# Supplementary material
Source: bioRxiv or medRxiv preprint supplement (https://medrxiv.org/highwire/filestream/73606/field_highwire_adjunct_files/0/2020.03.11.20034363-1.pdf)

# Guangdong

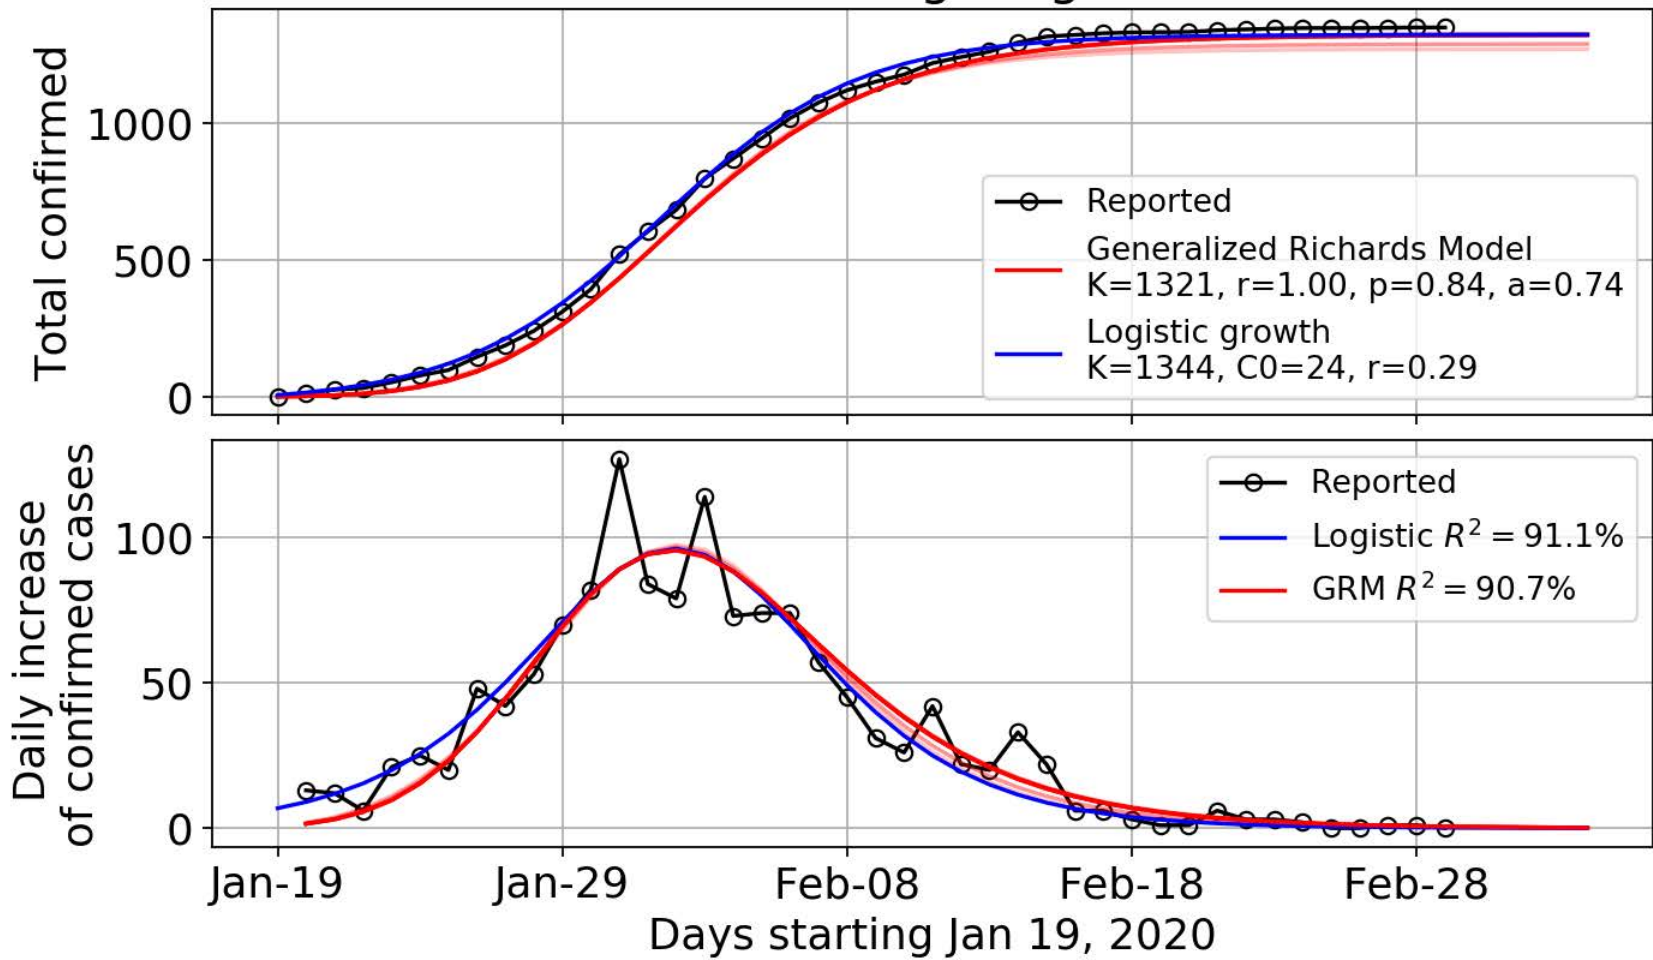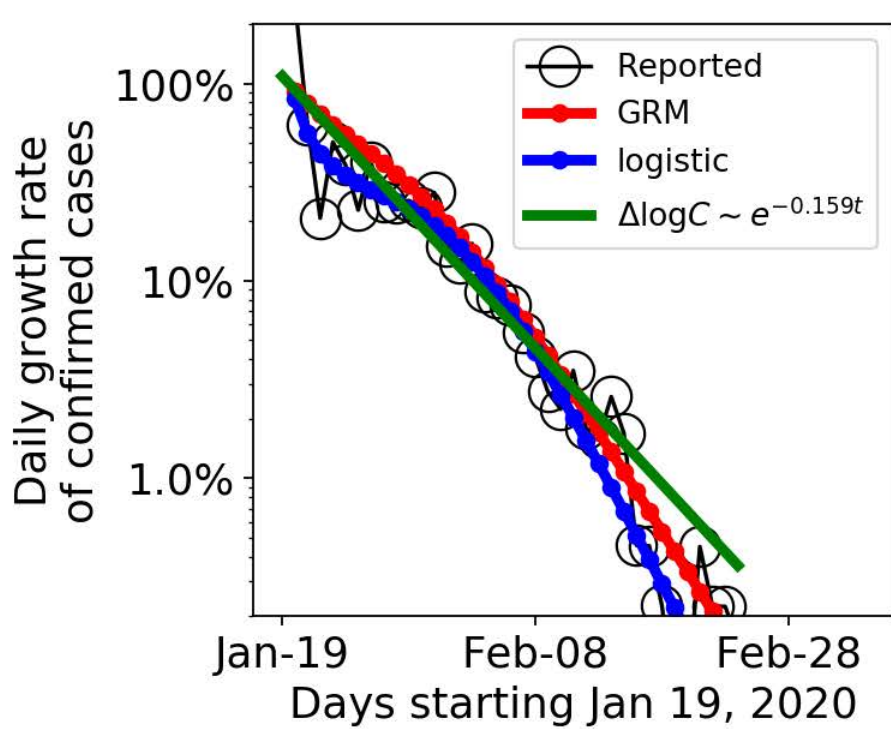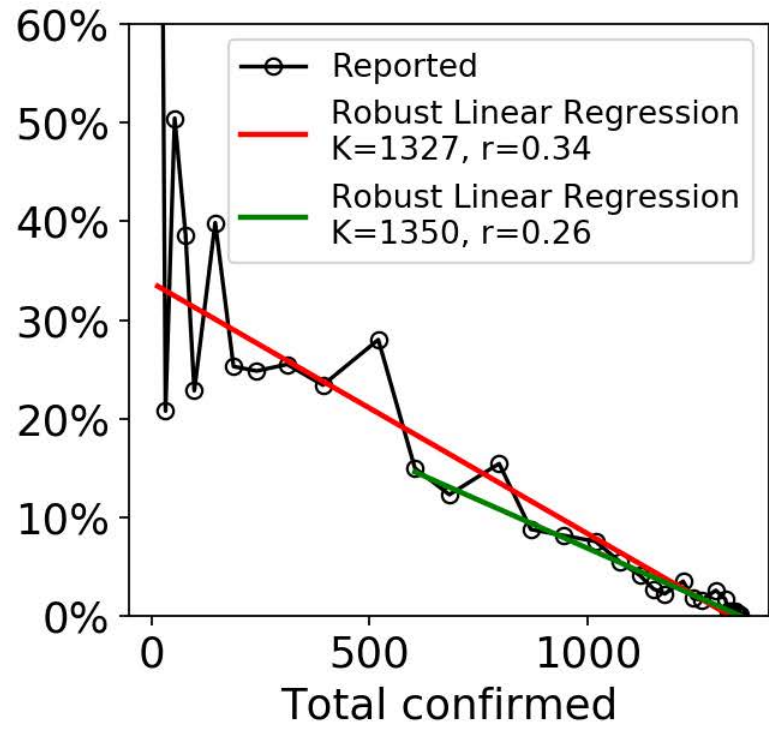

# Henan

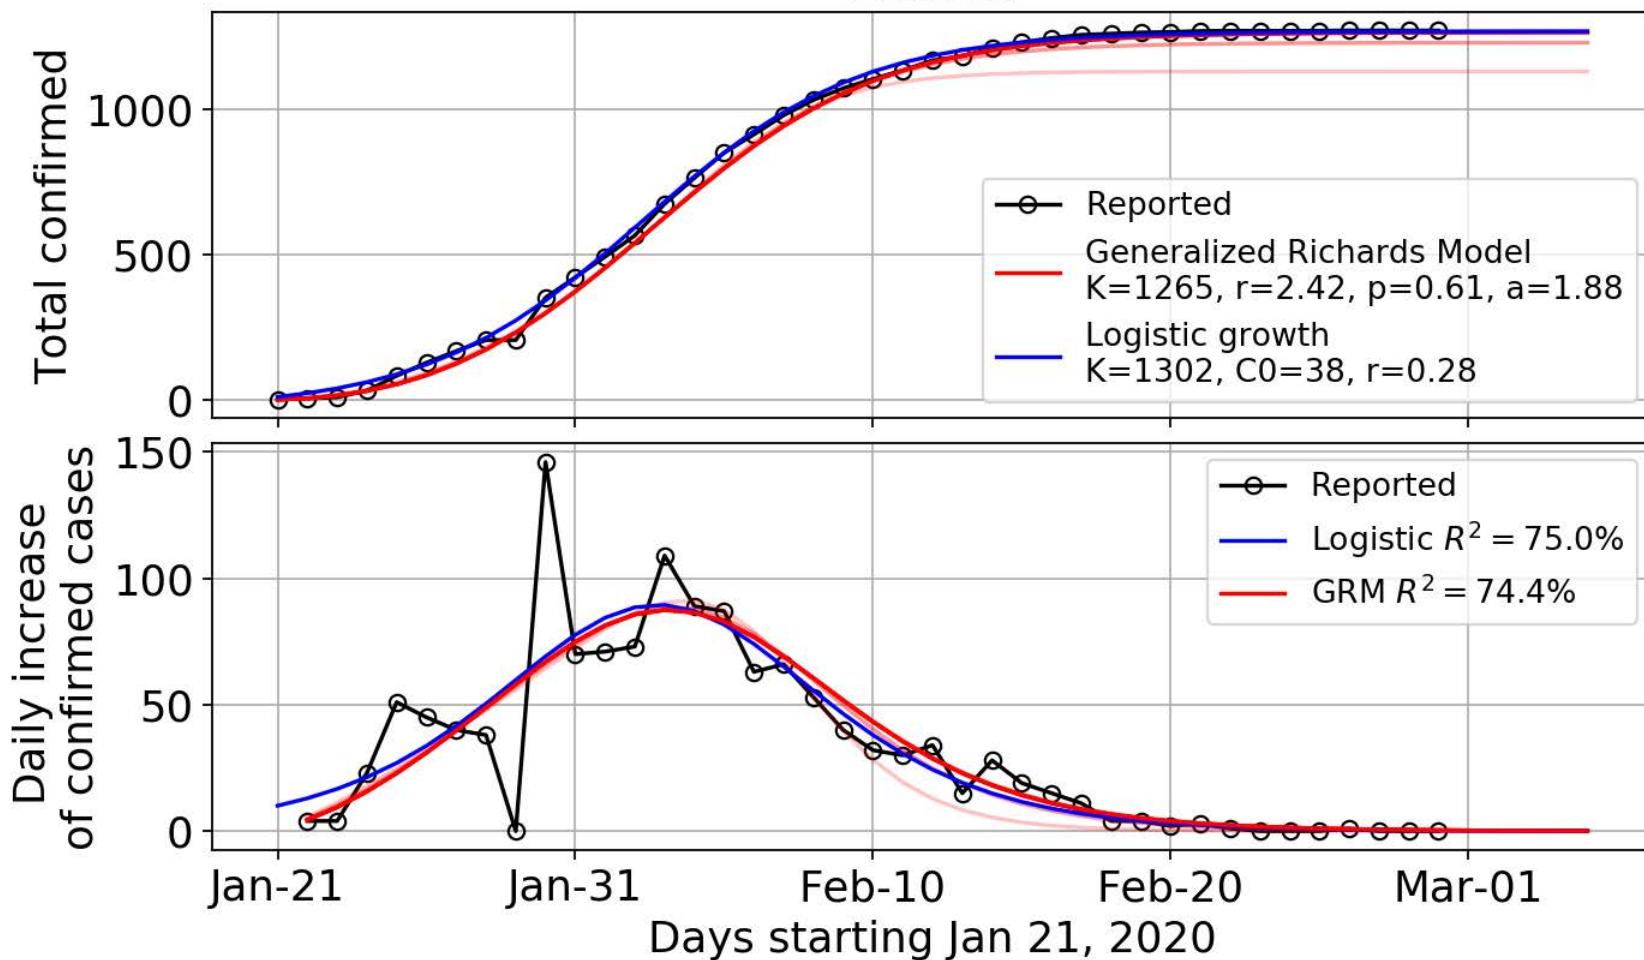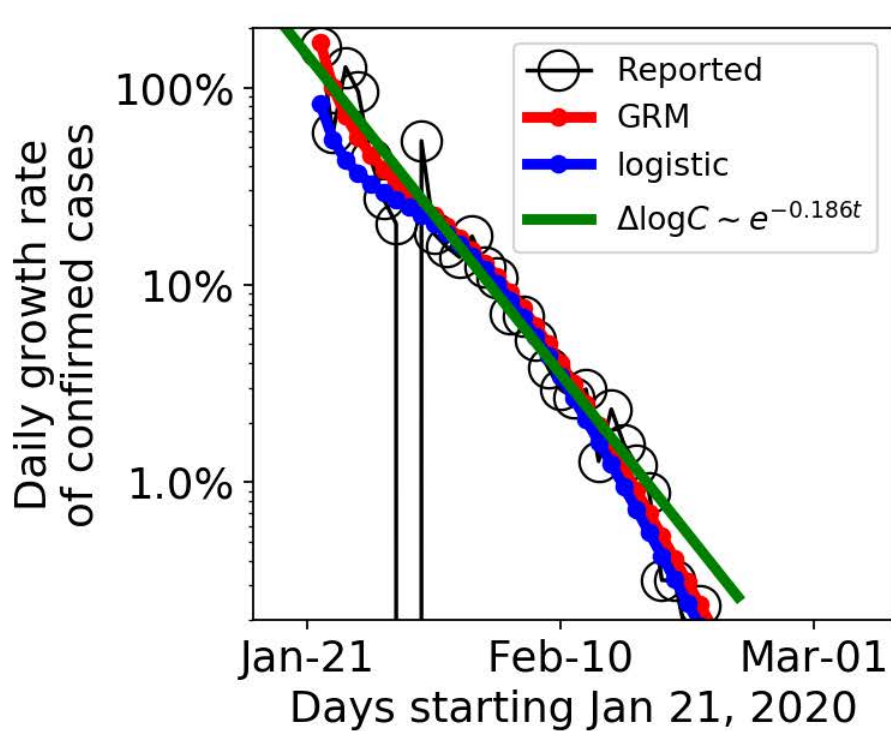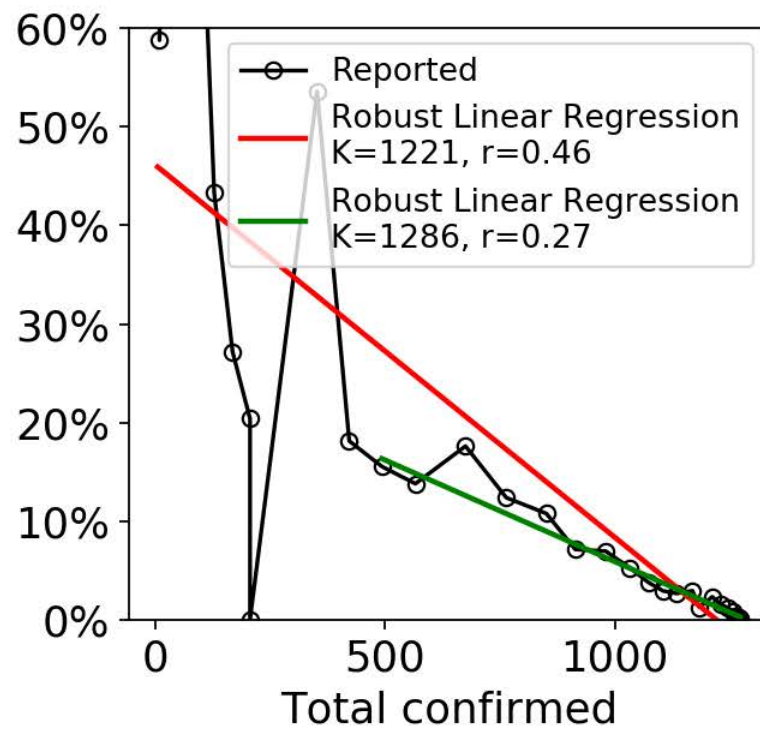

# Zhejiang

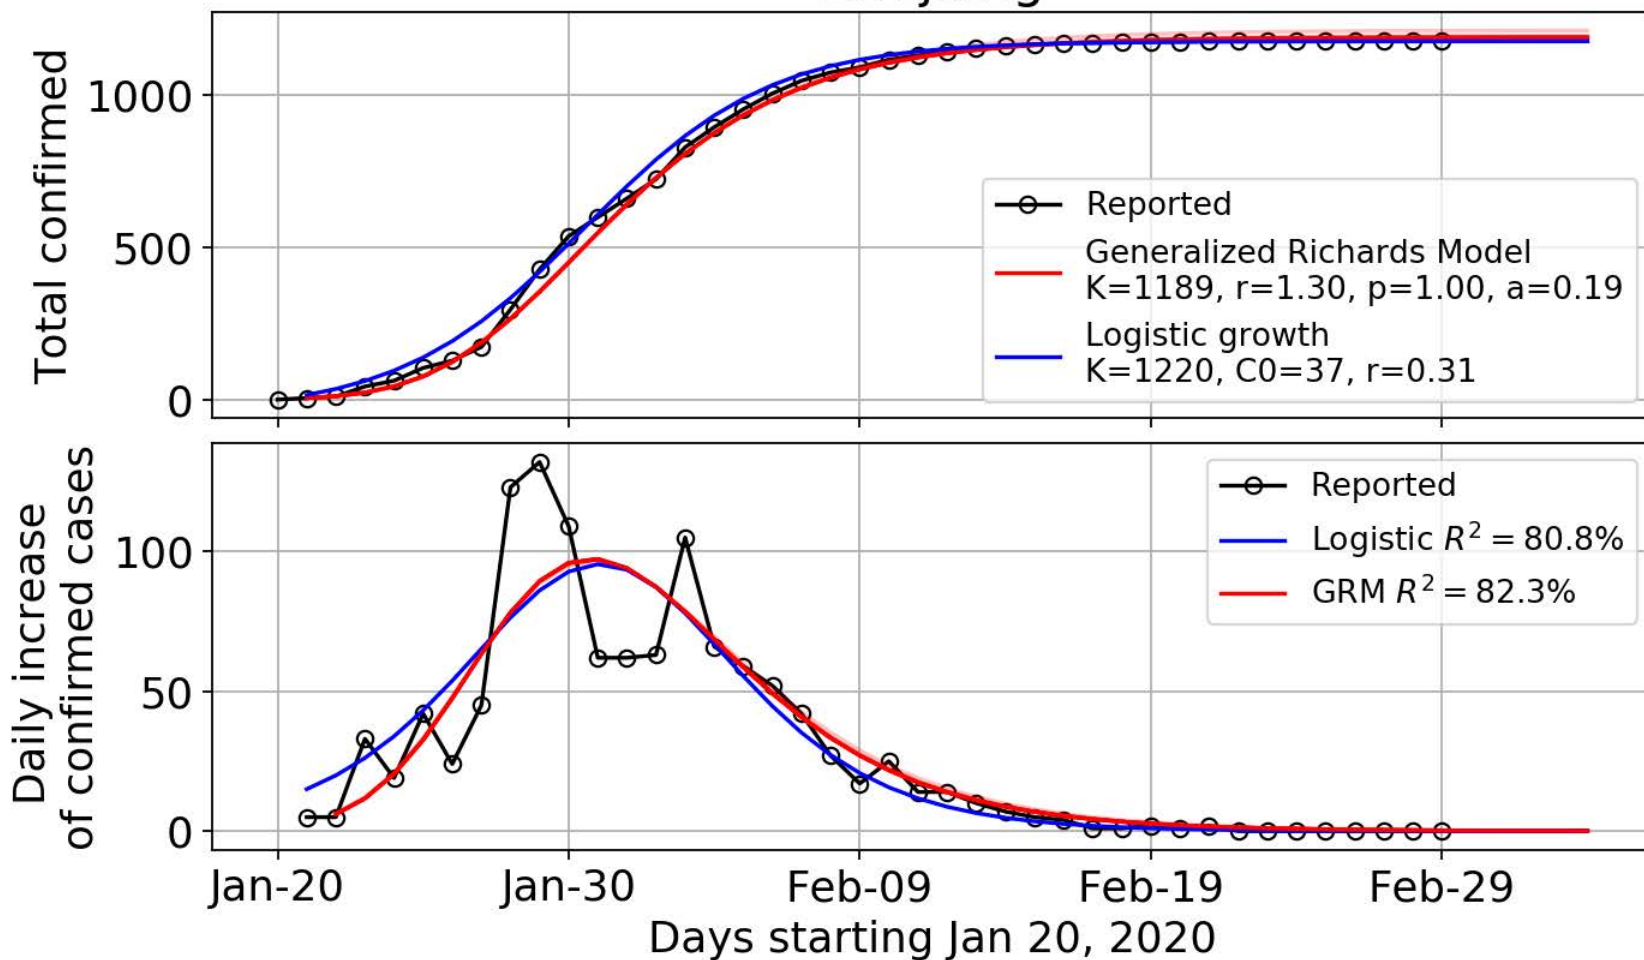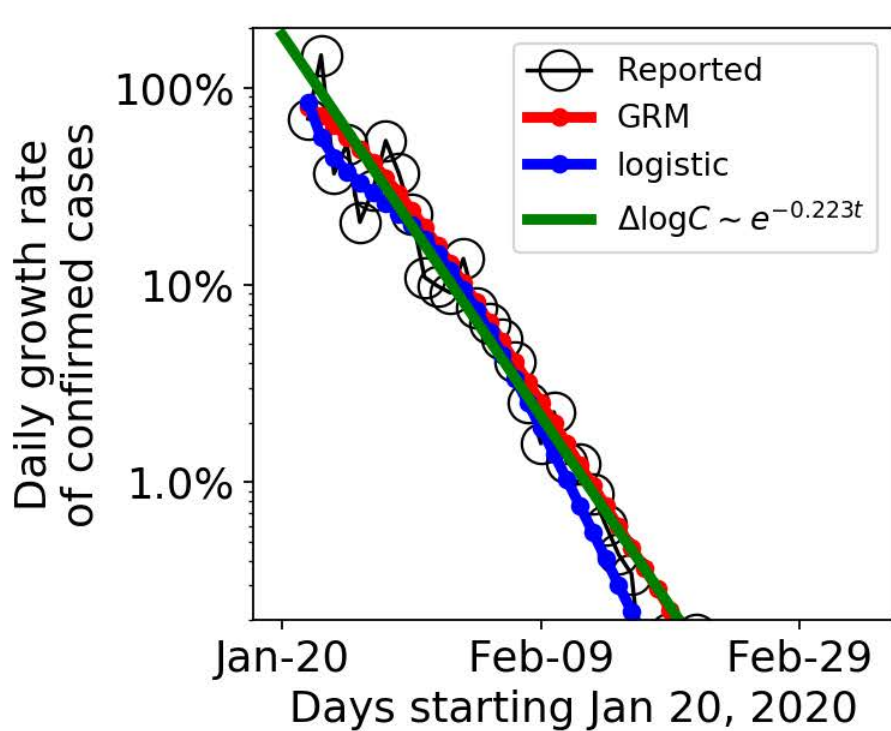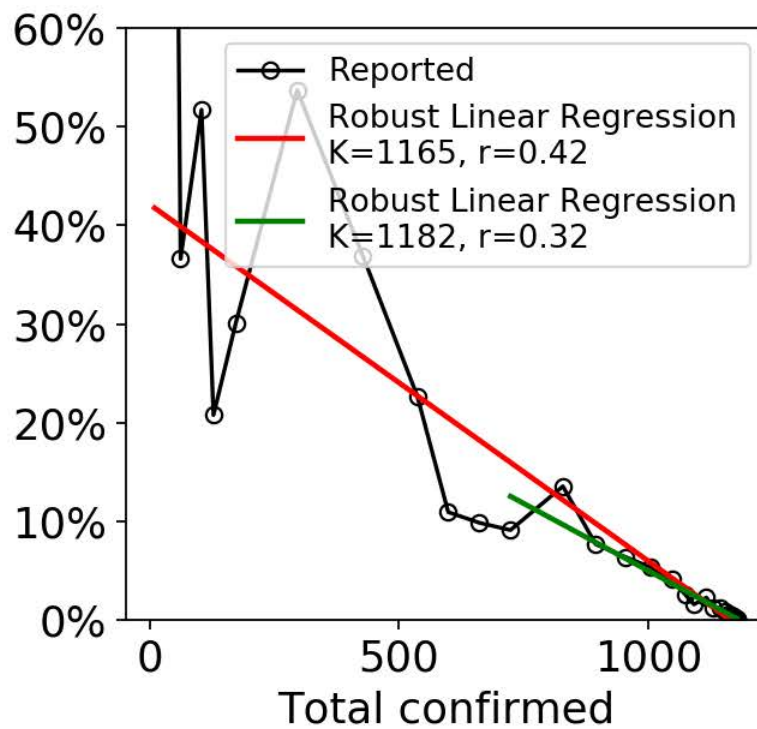

# Hunan

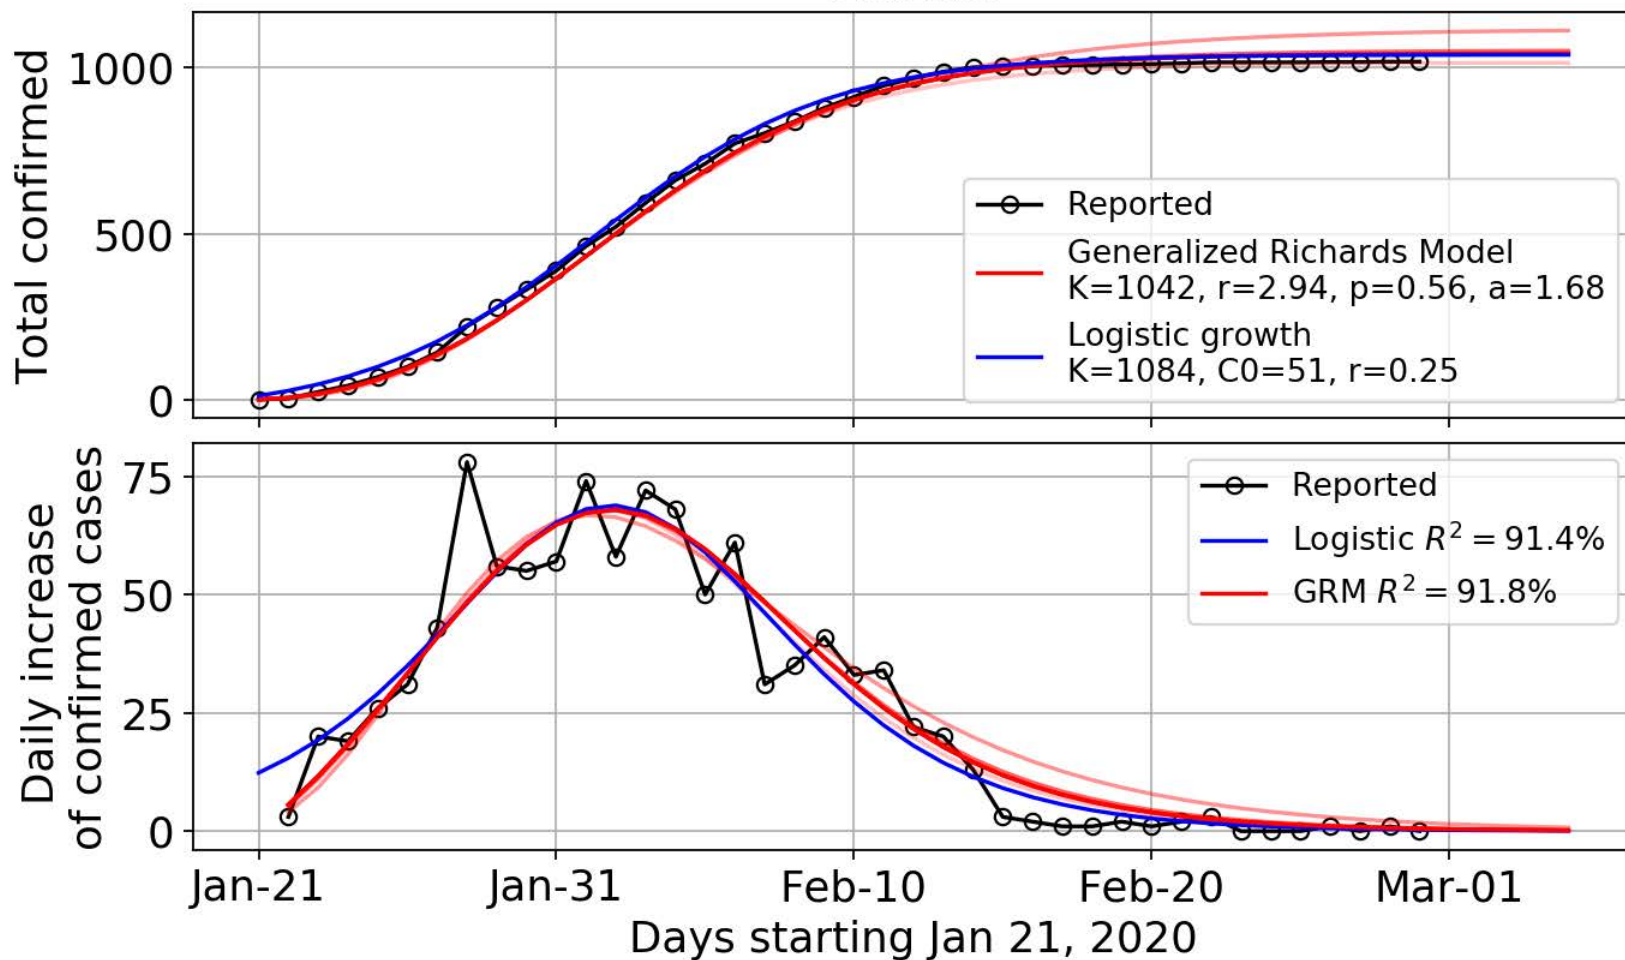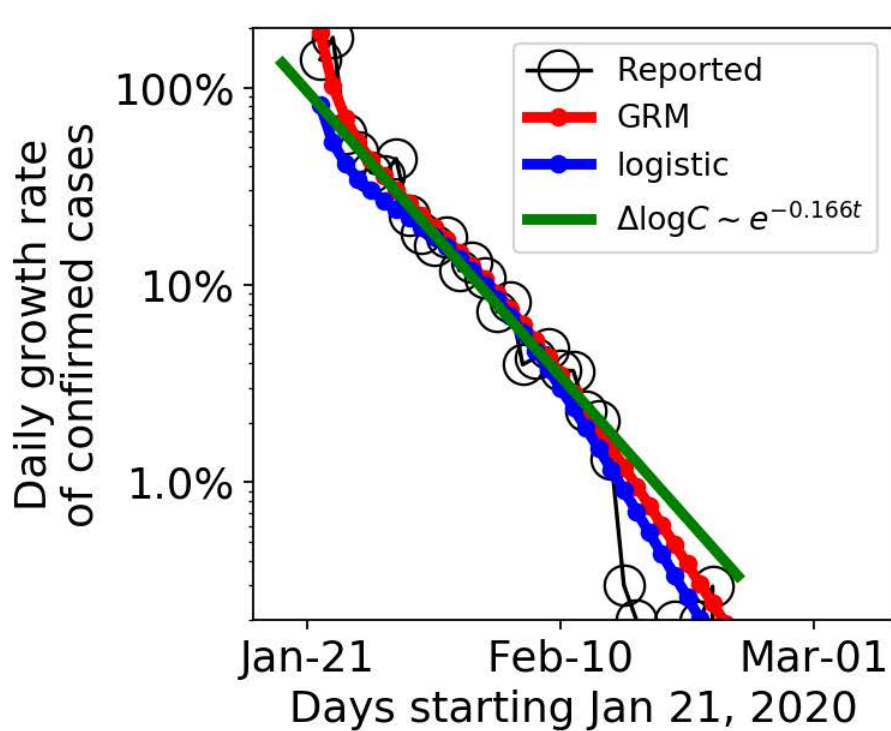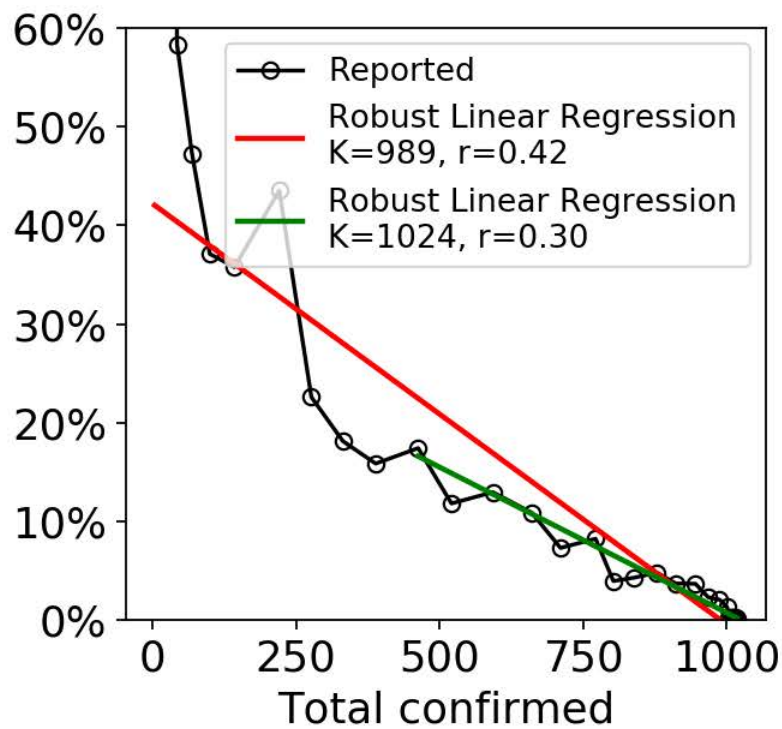

# Anhui

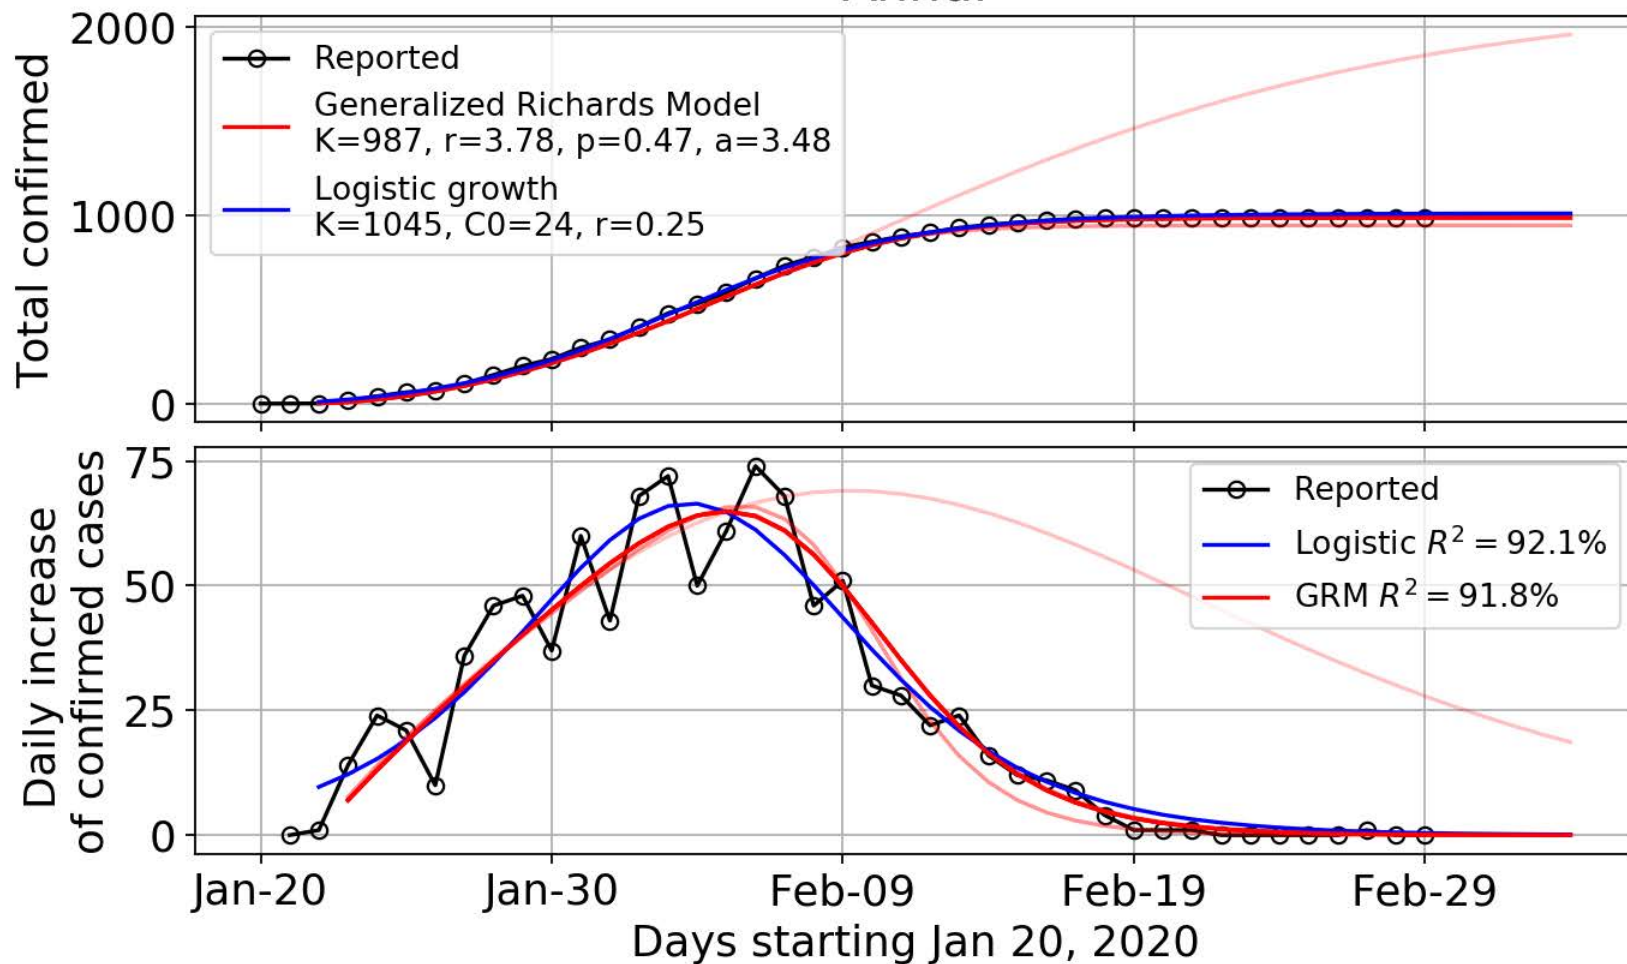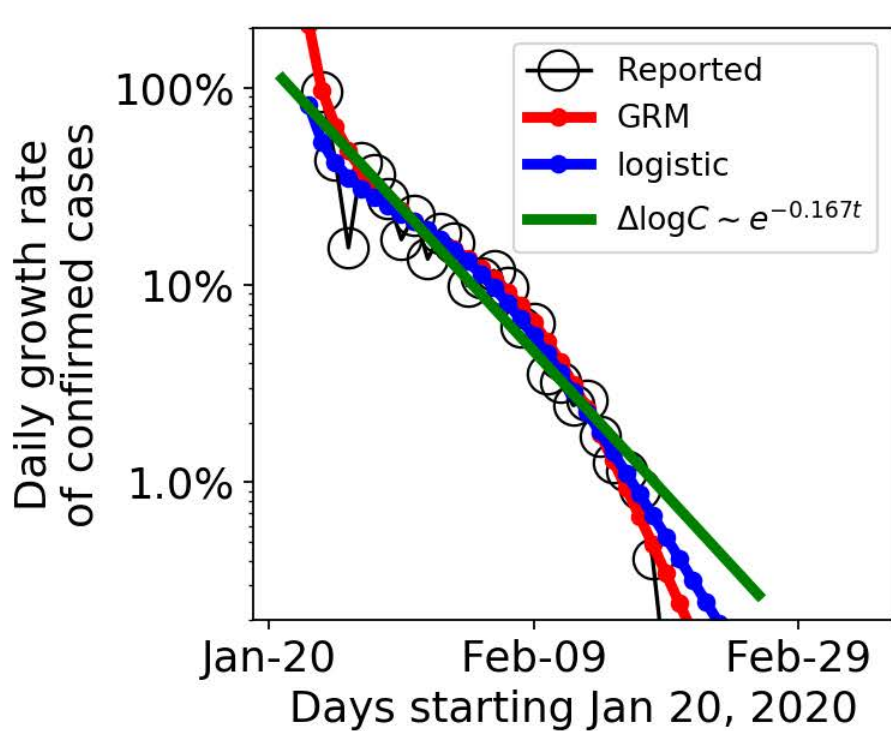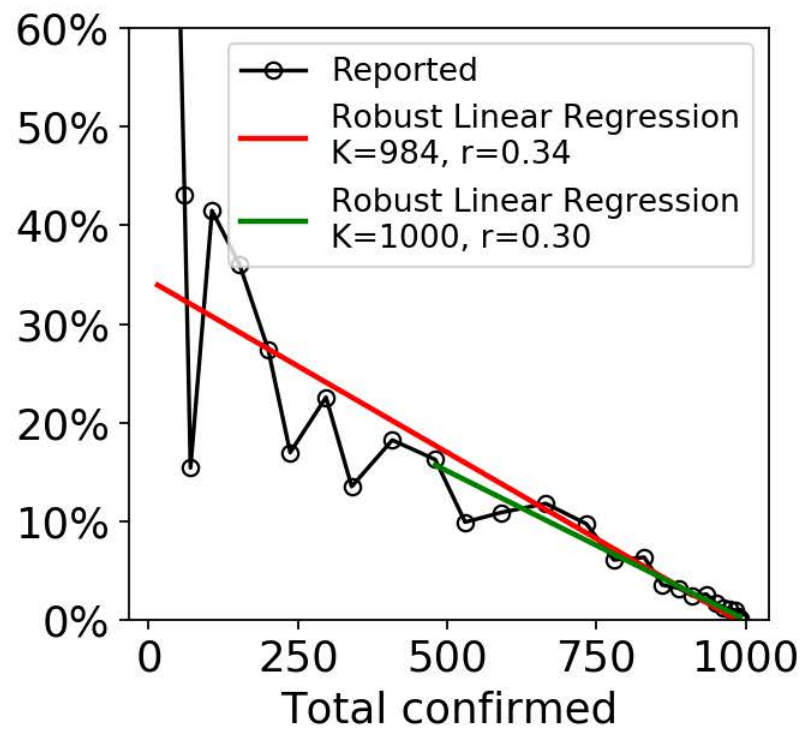

# Jiangxi

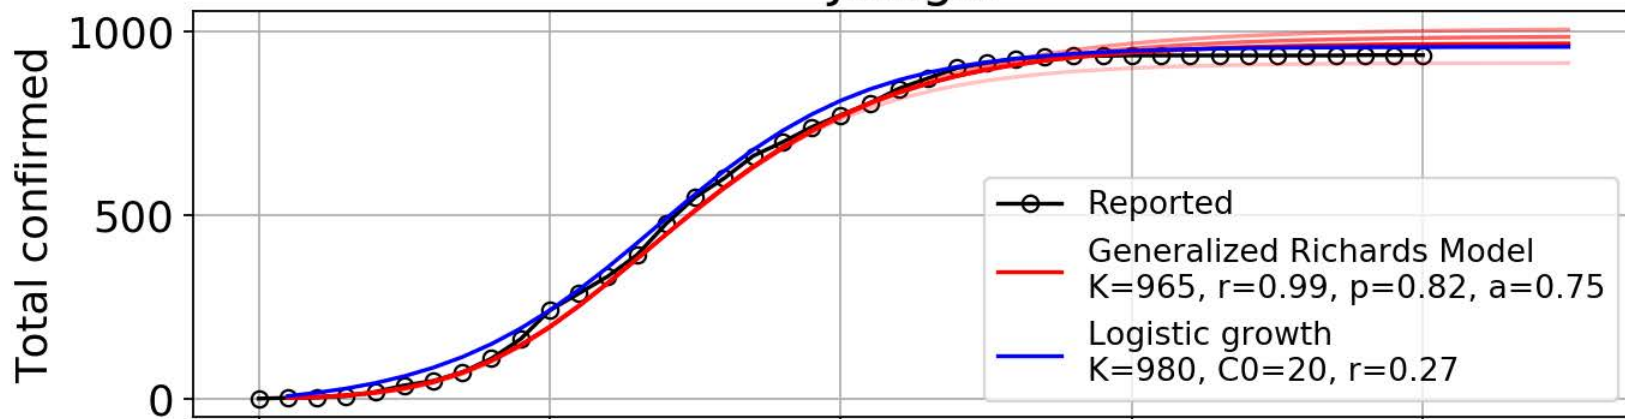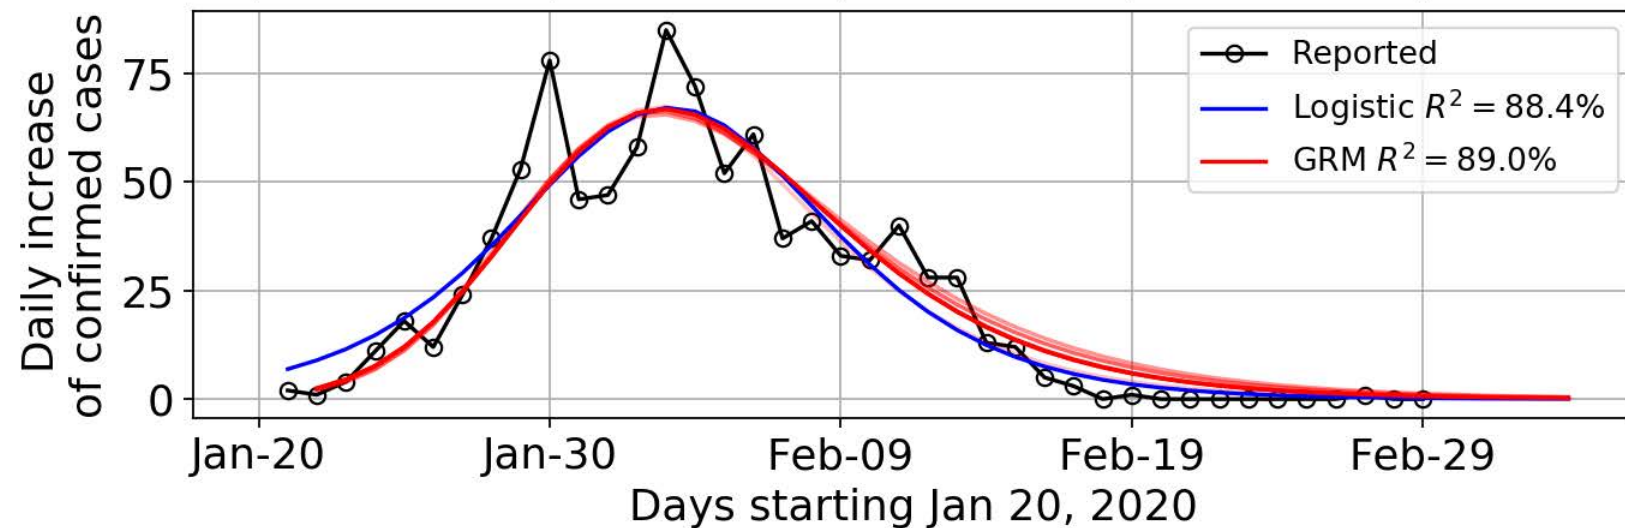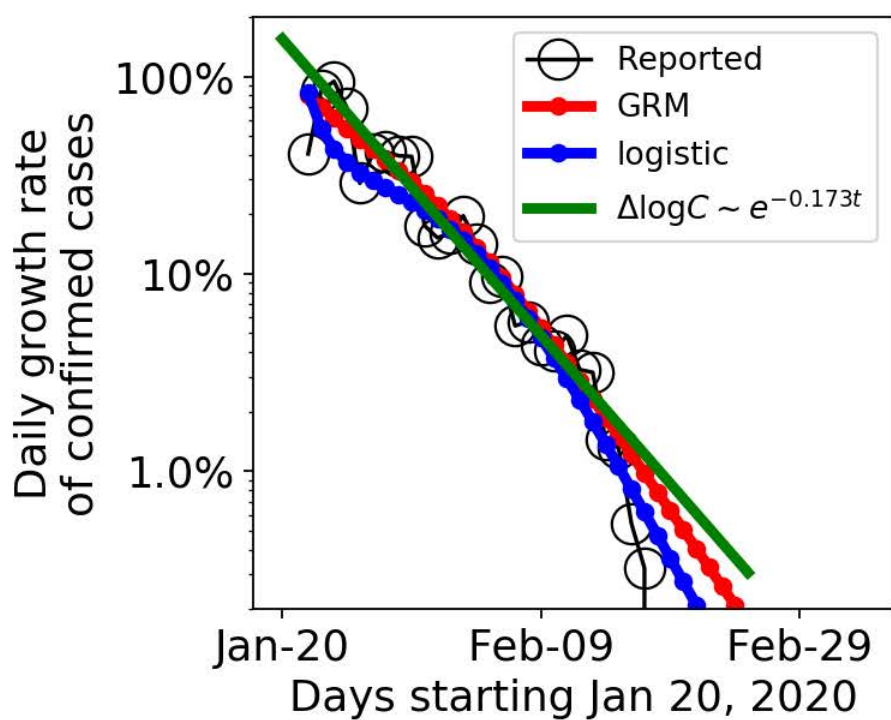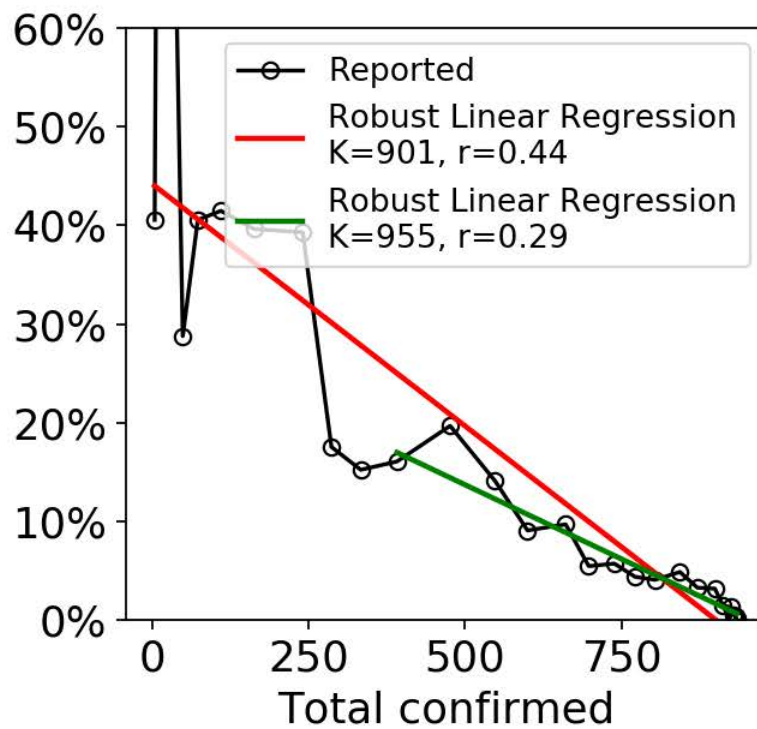

# Shandong

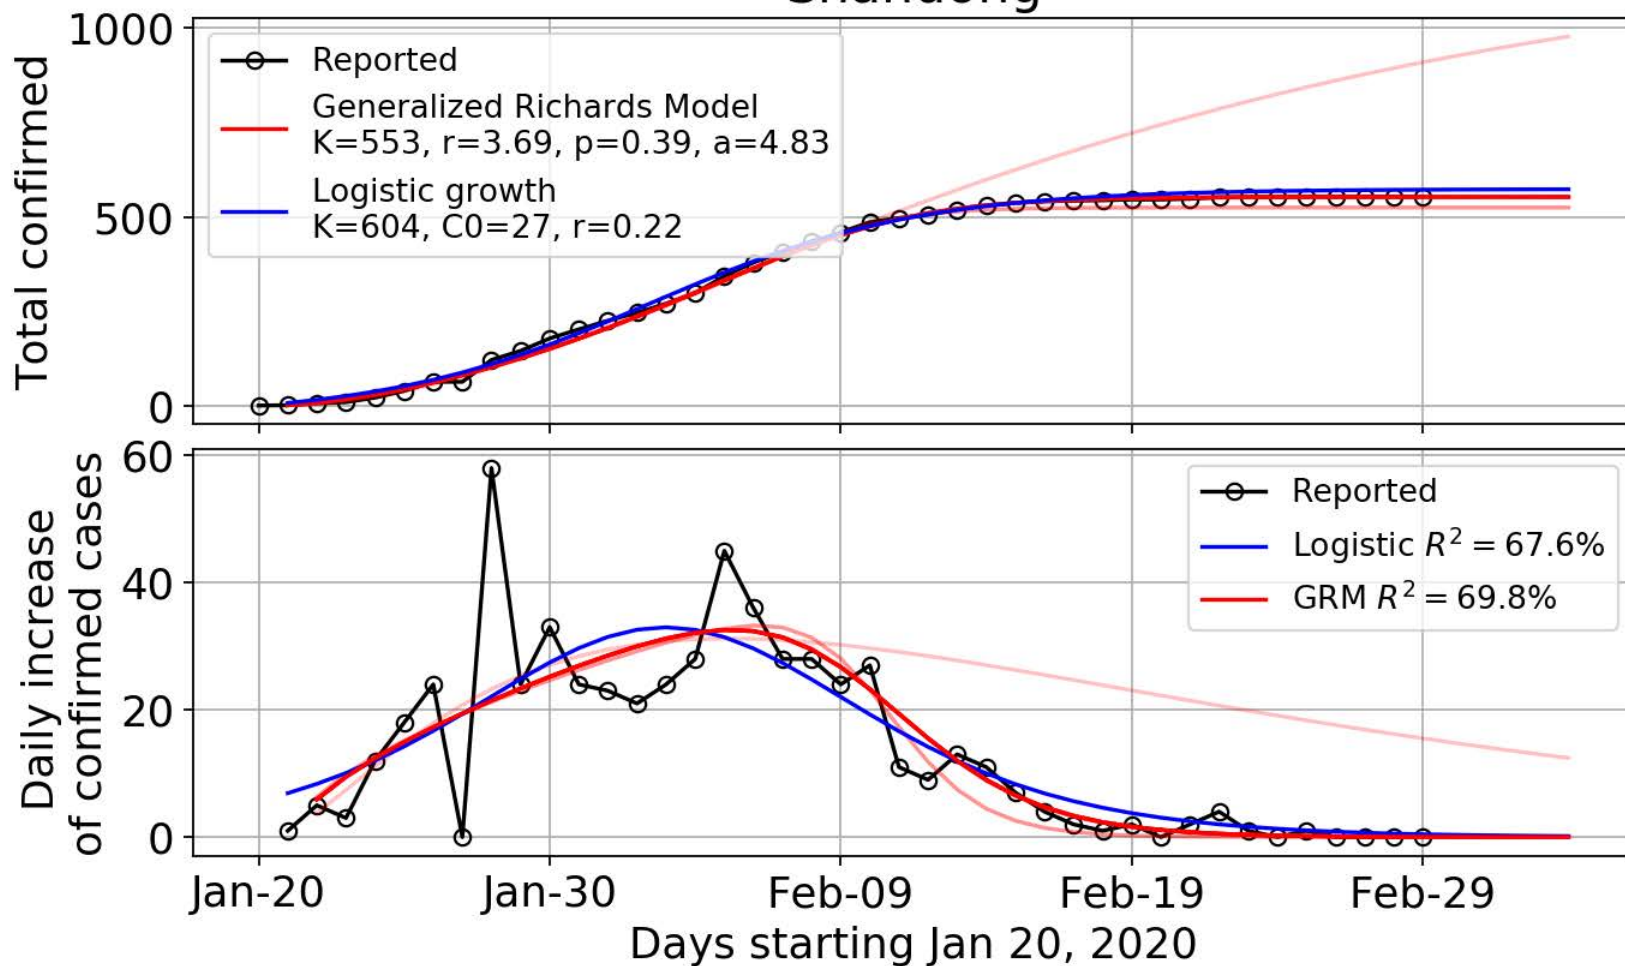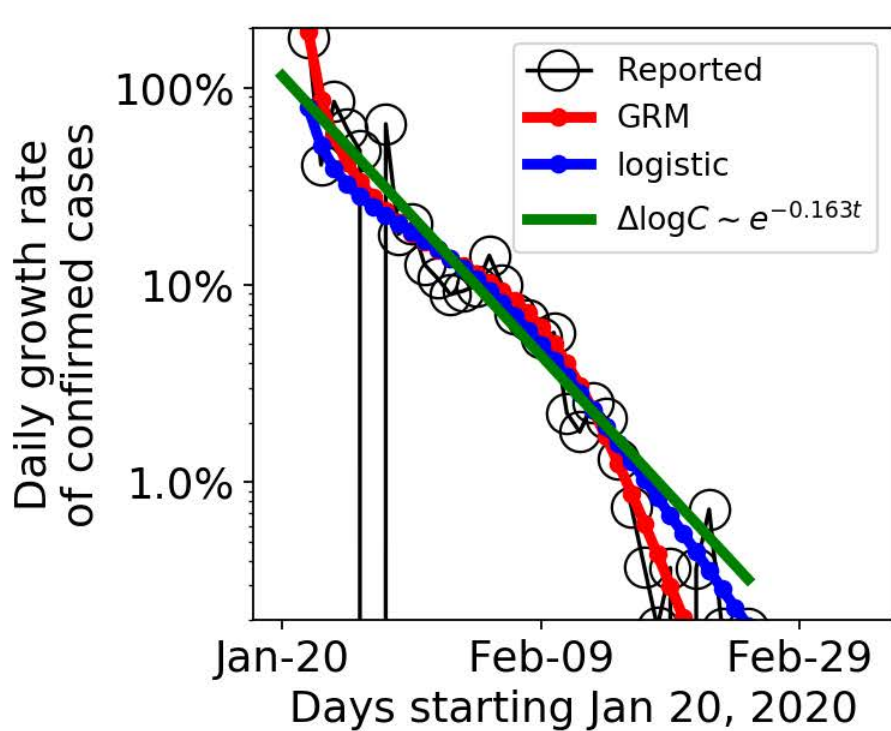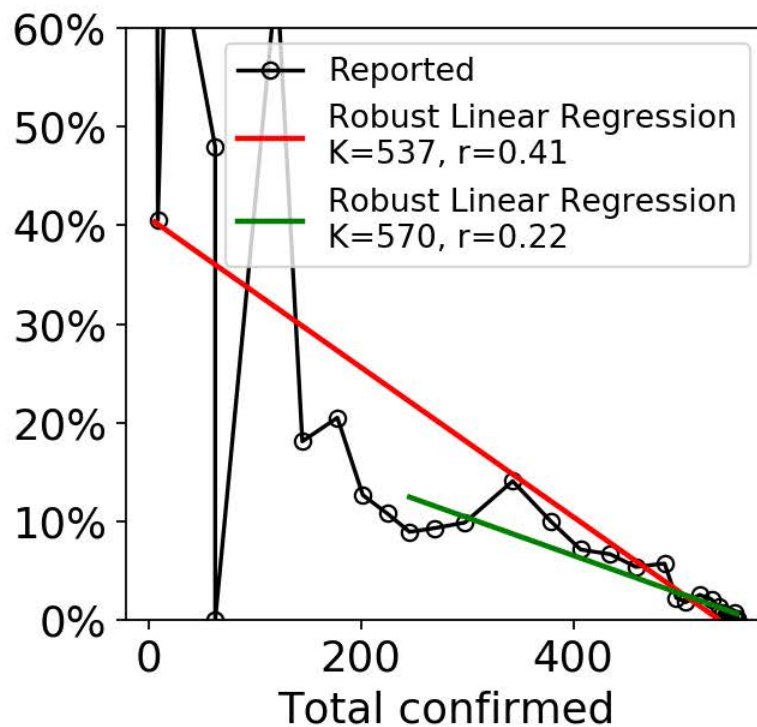

# Jiangsu

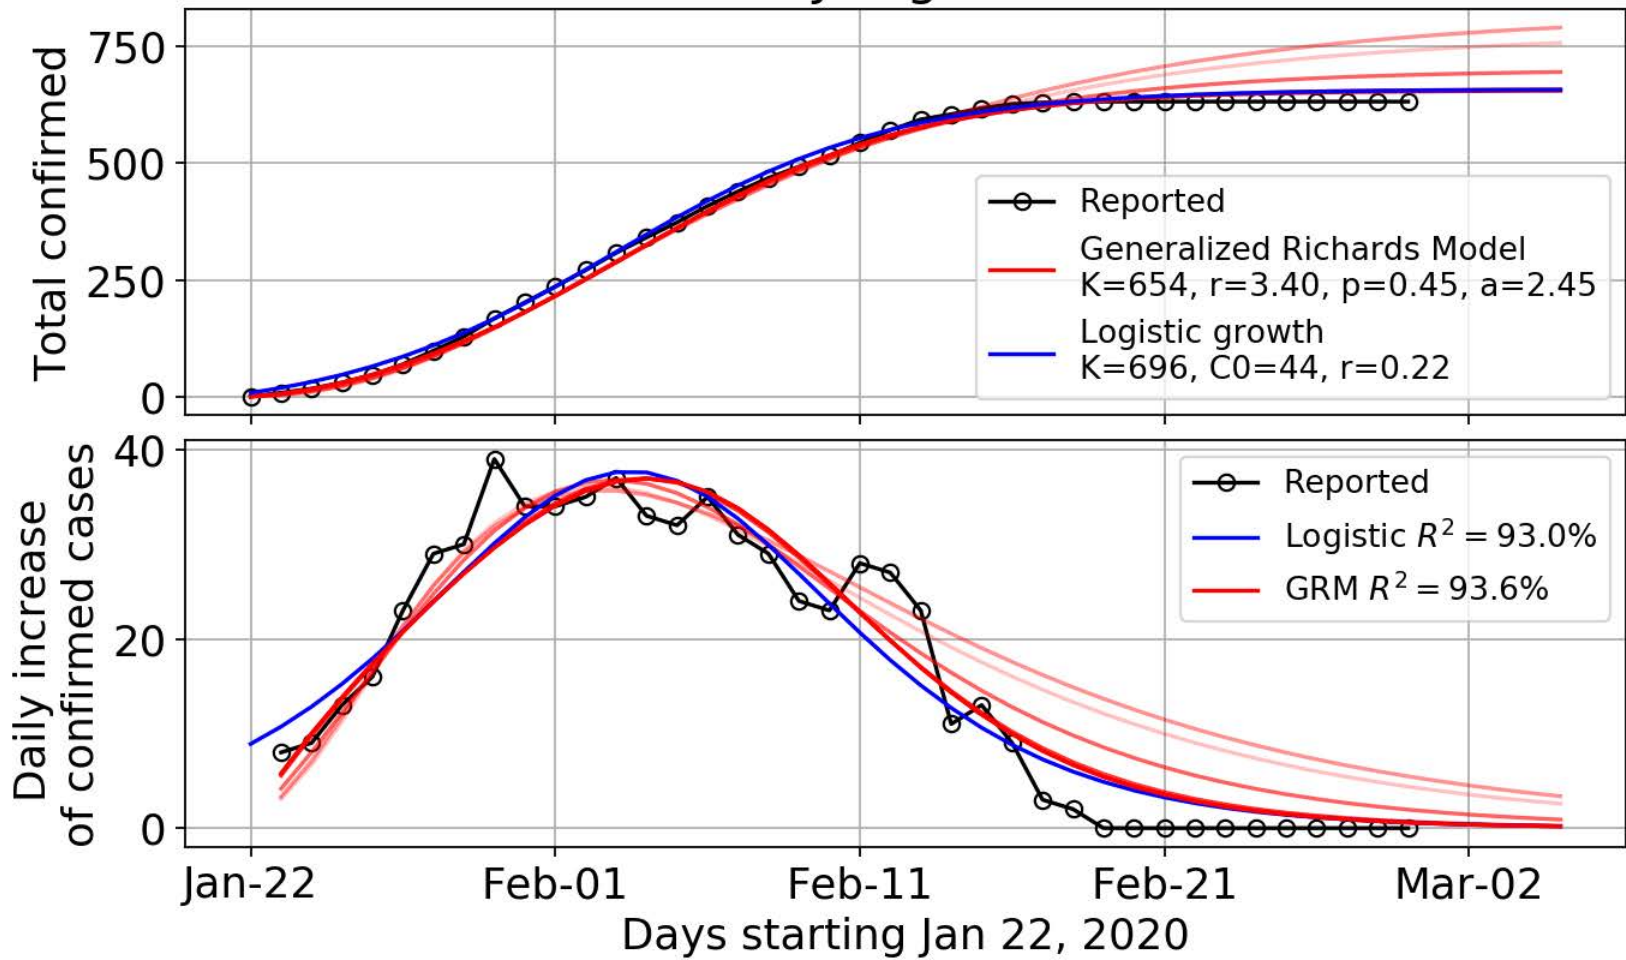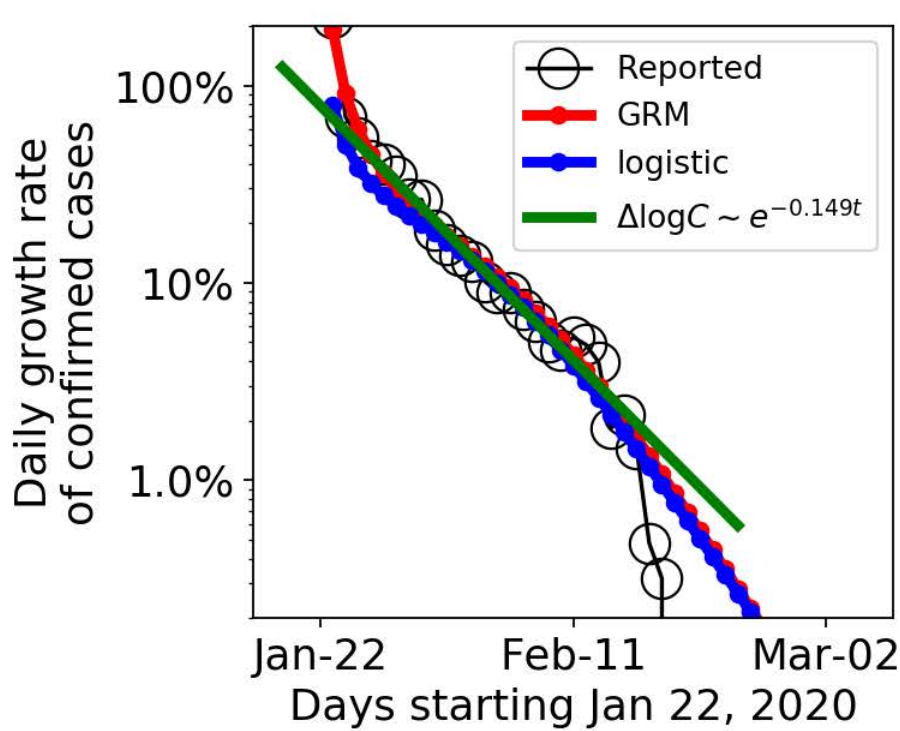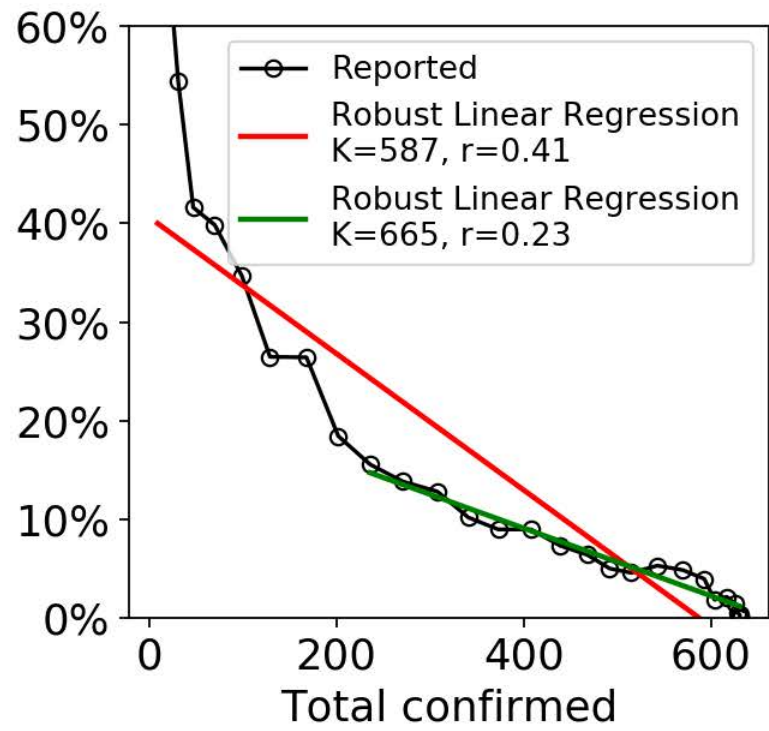



# Chongqing

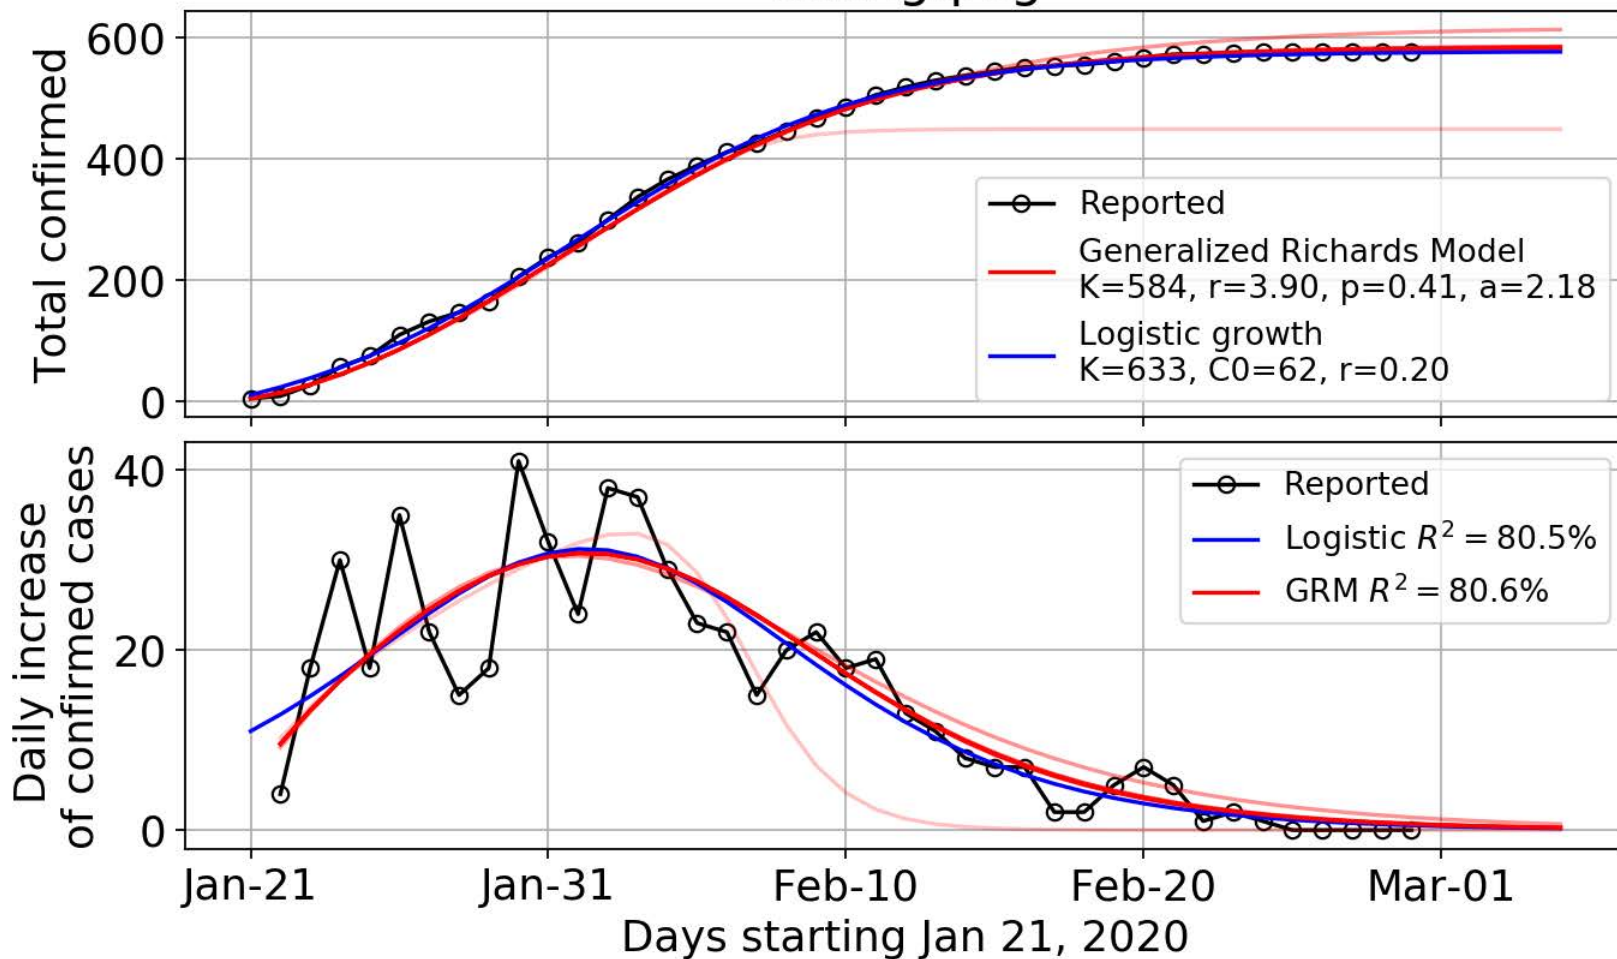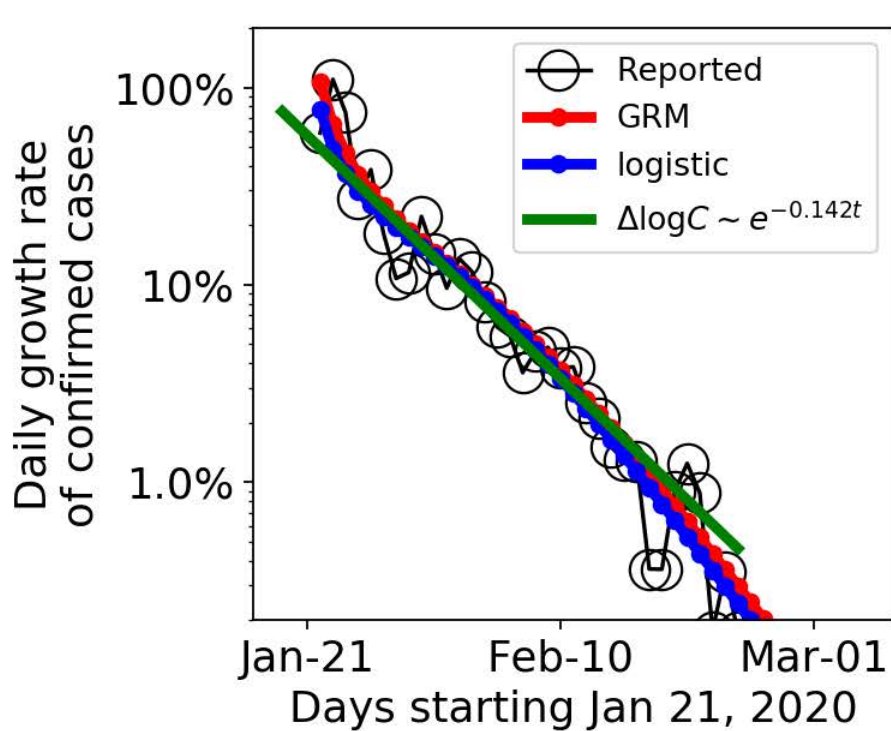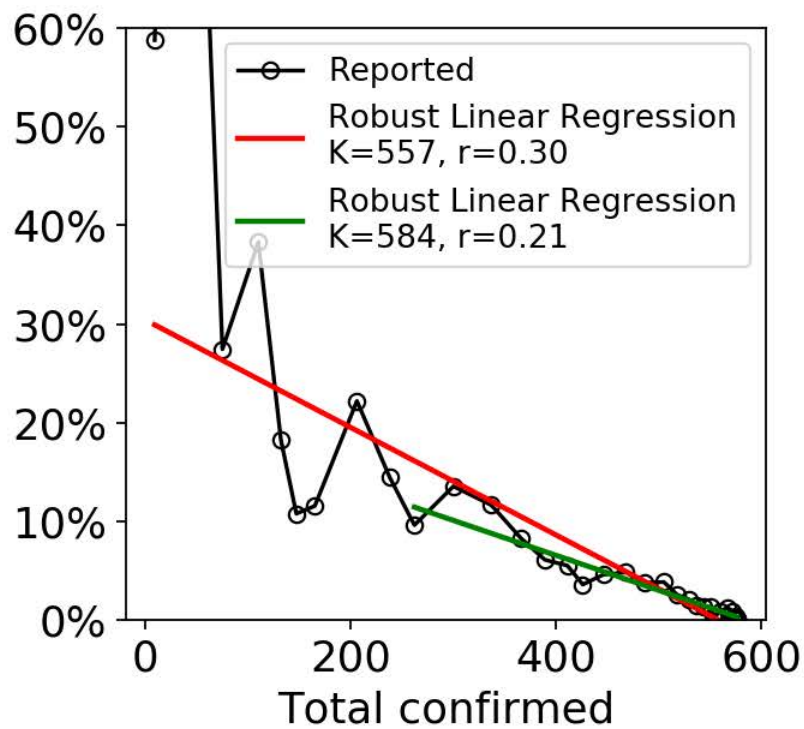

# Sichuan

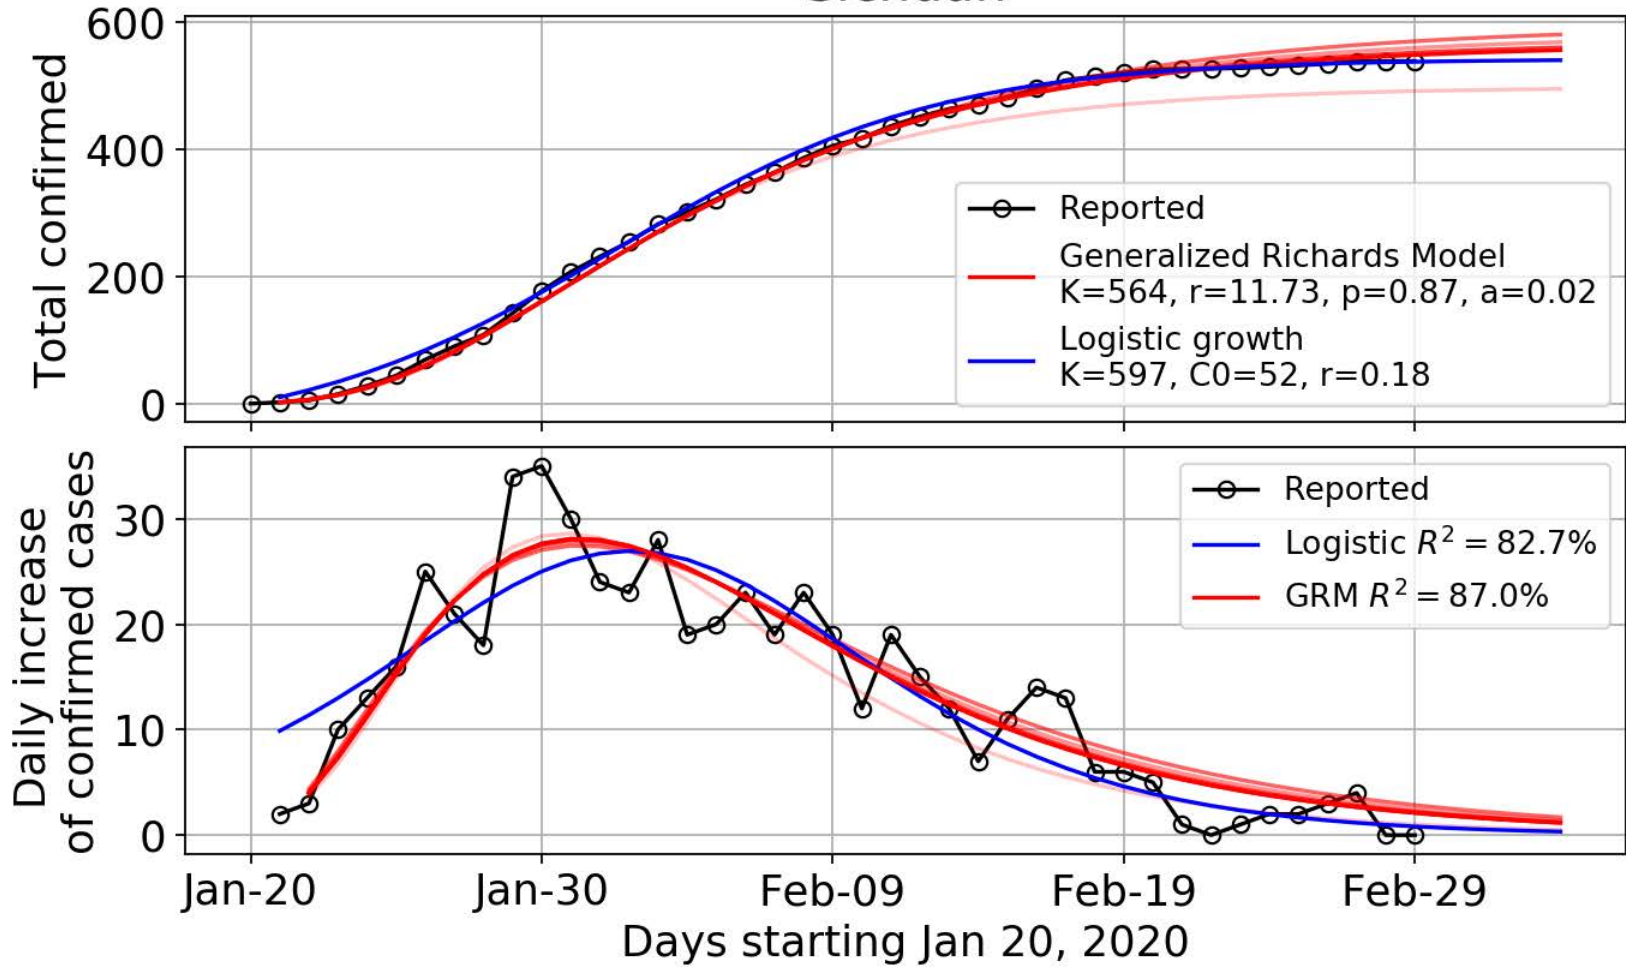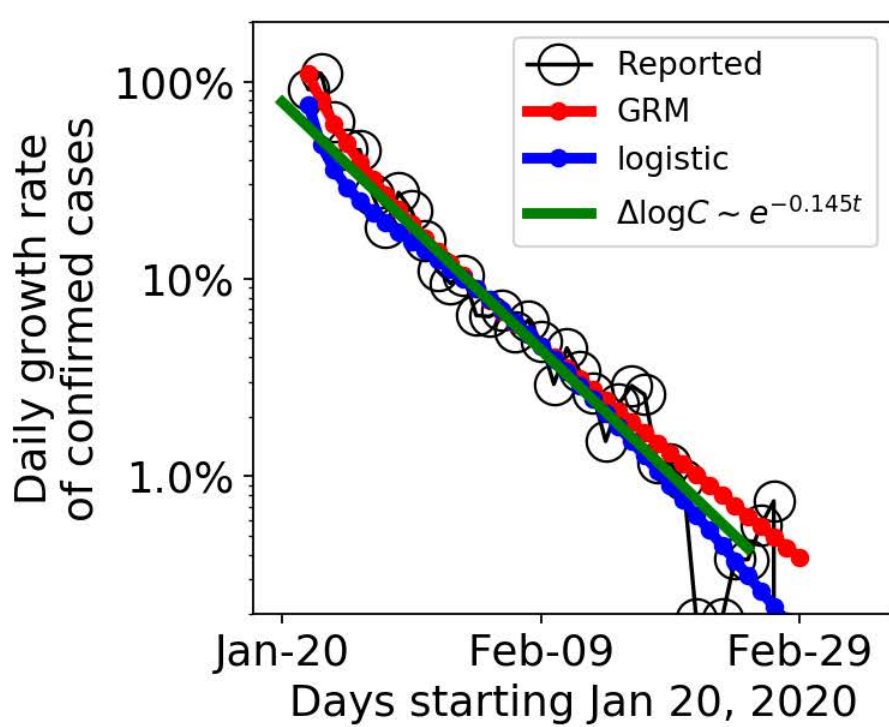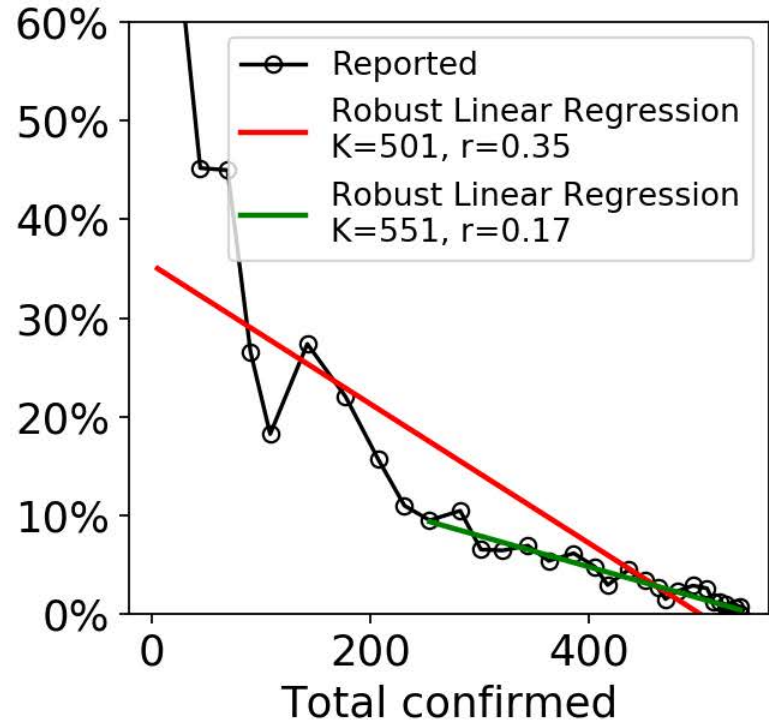

# Heilongjiang

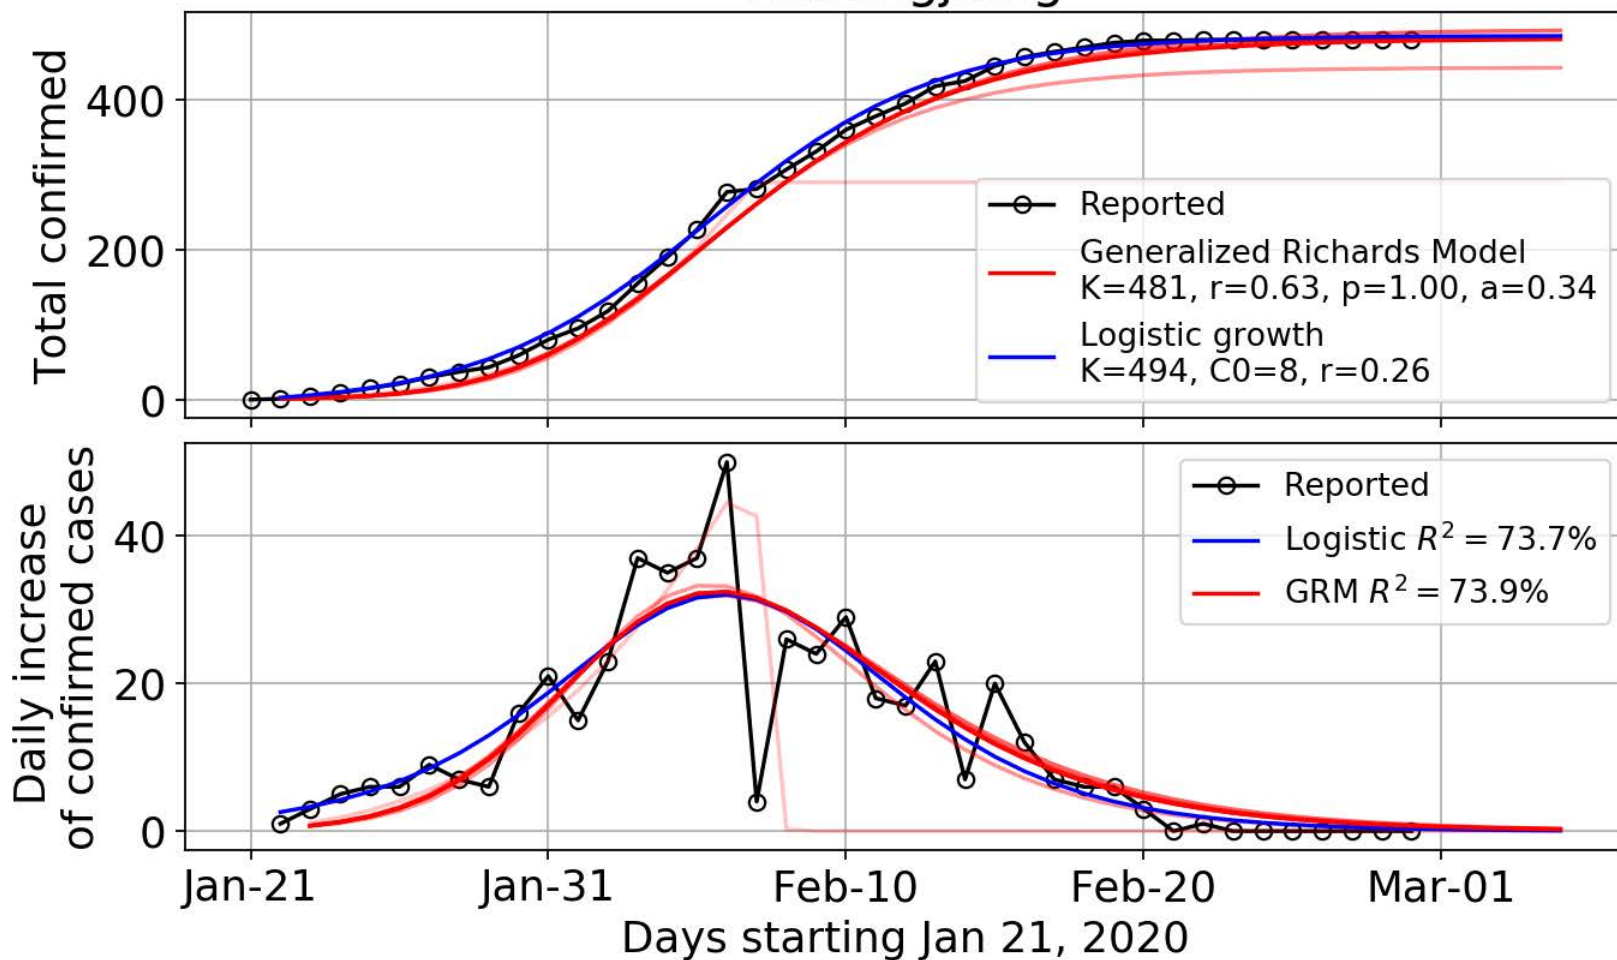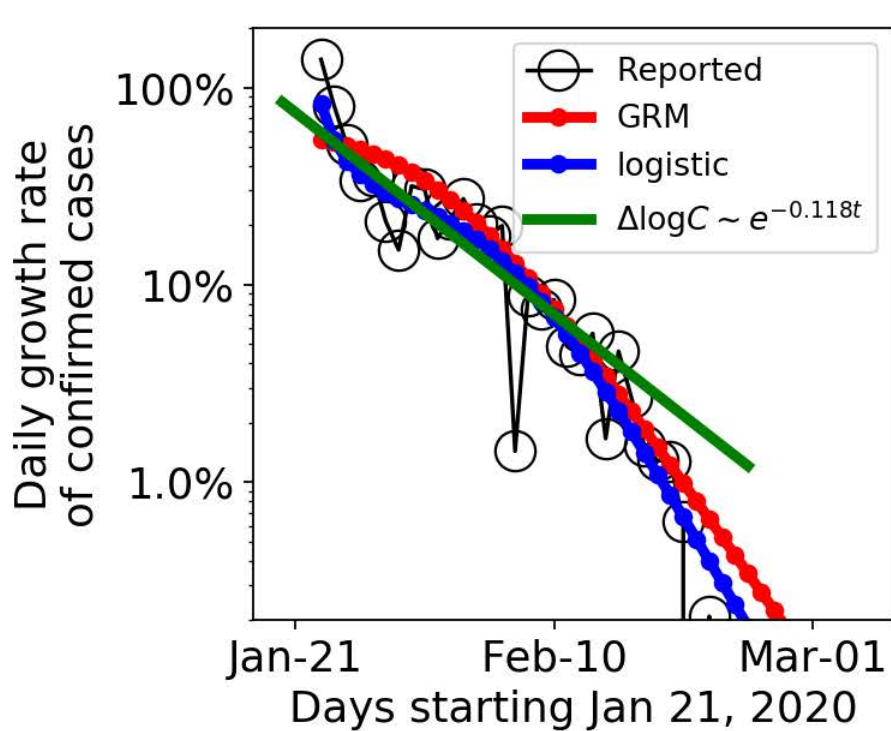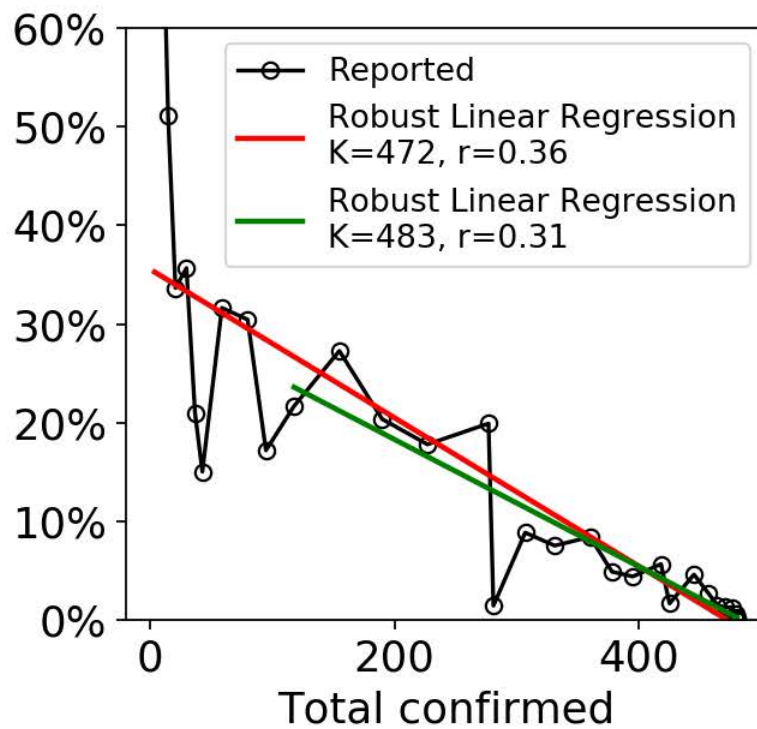

# Beijing

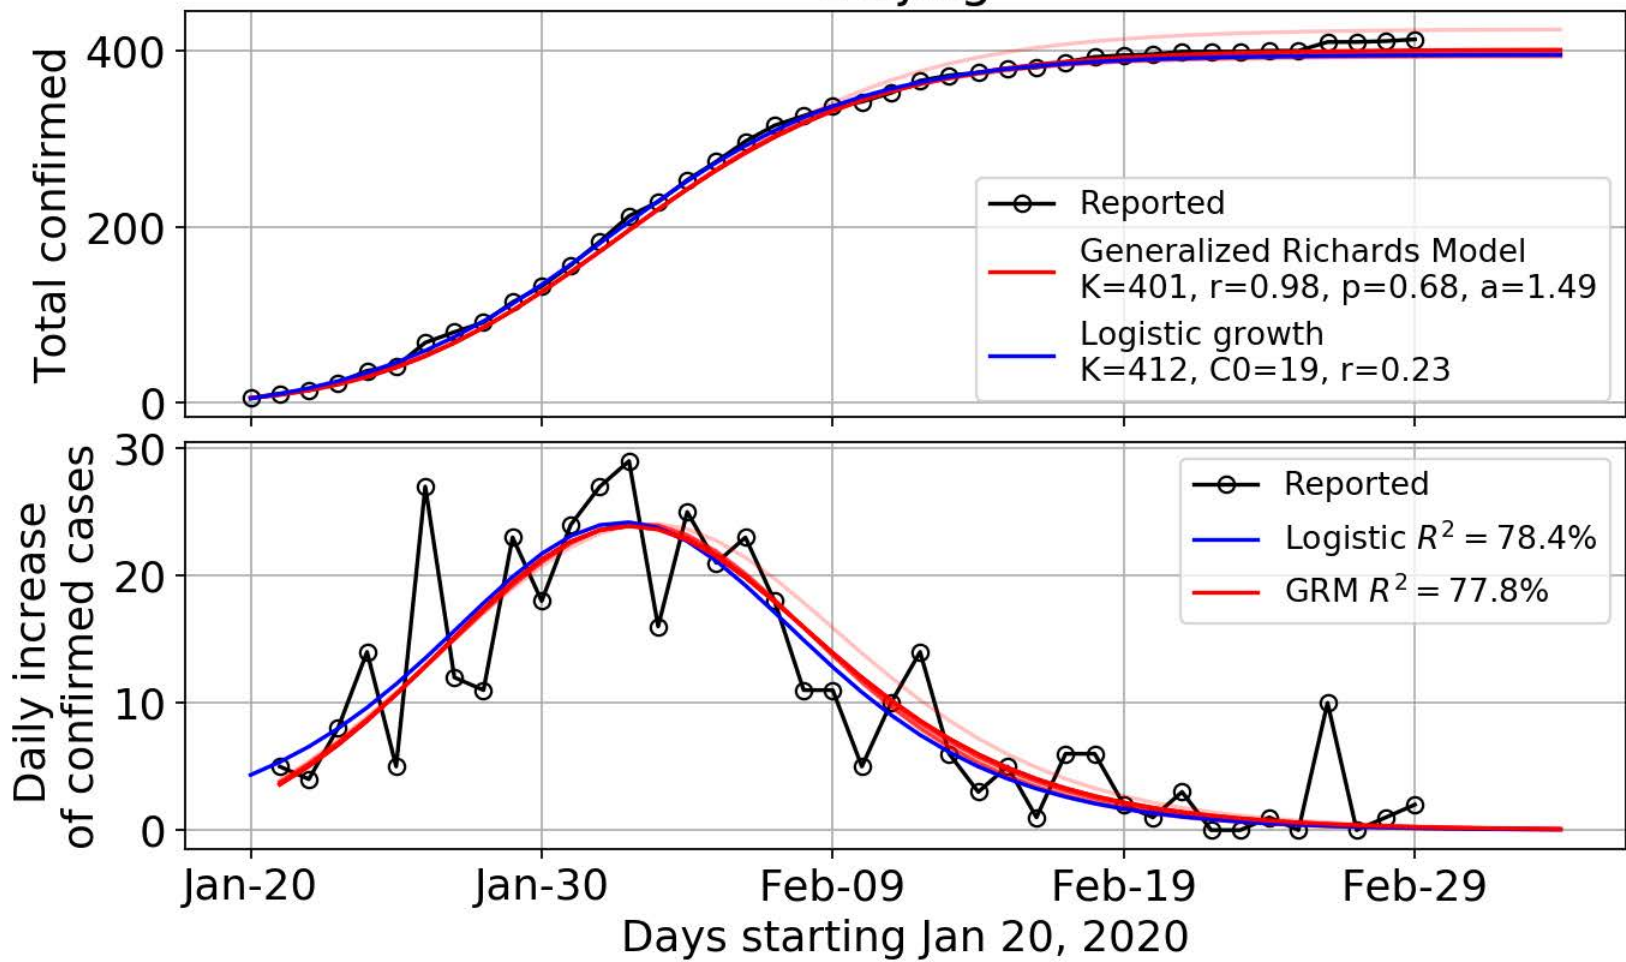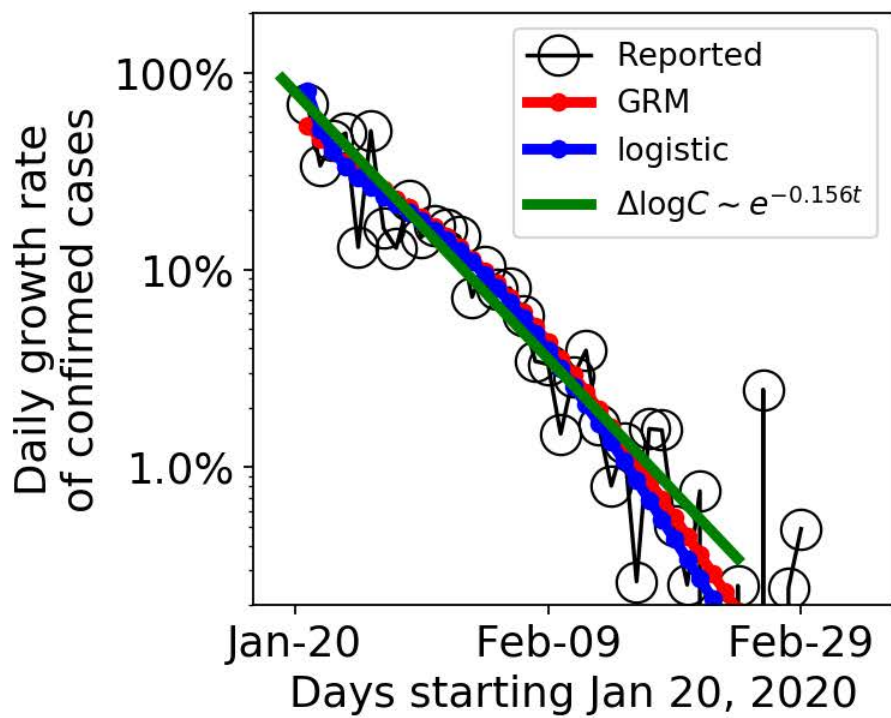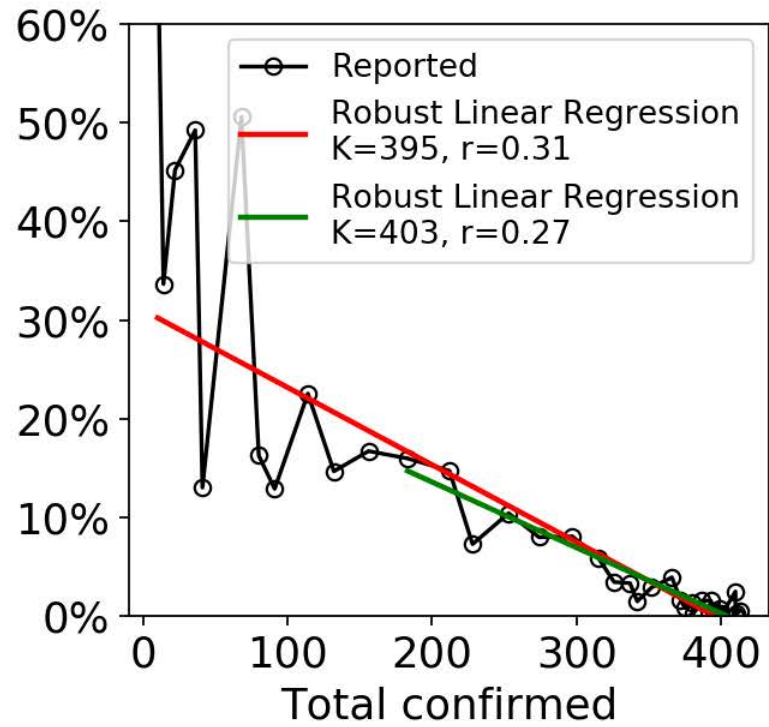

# Shanghai

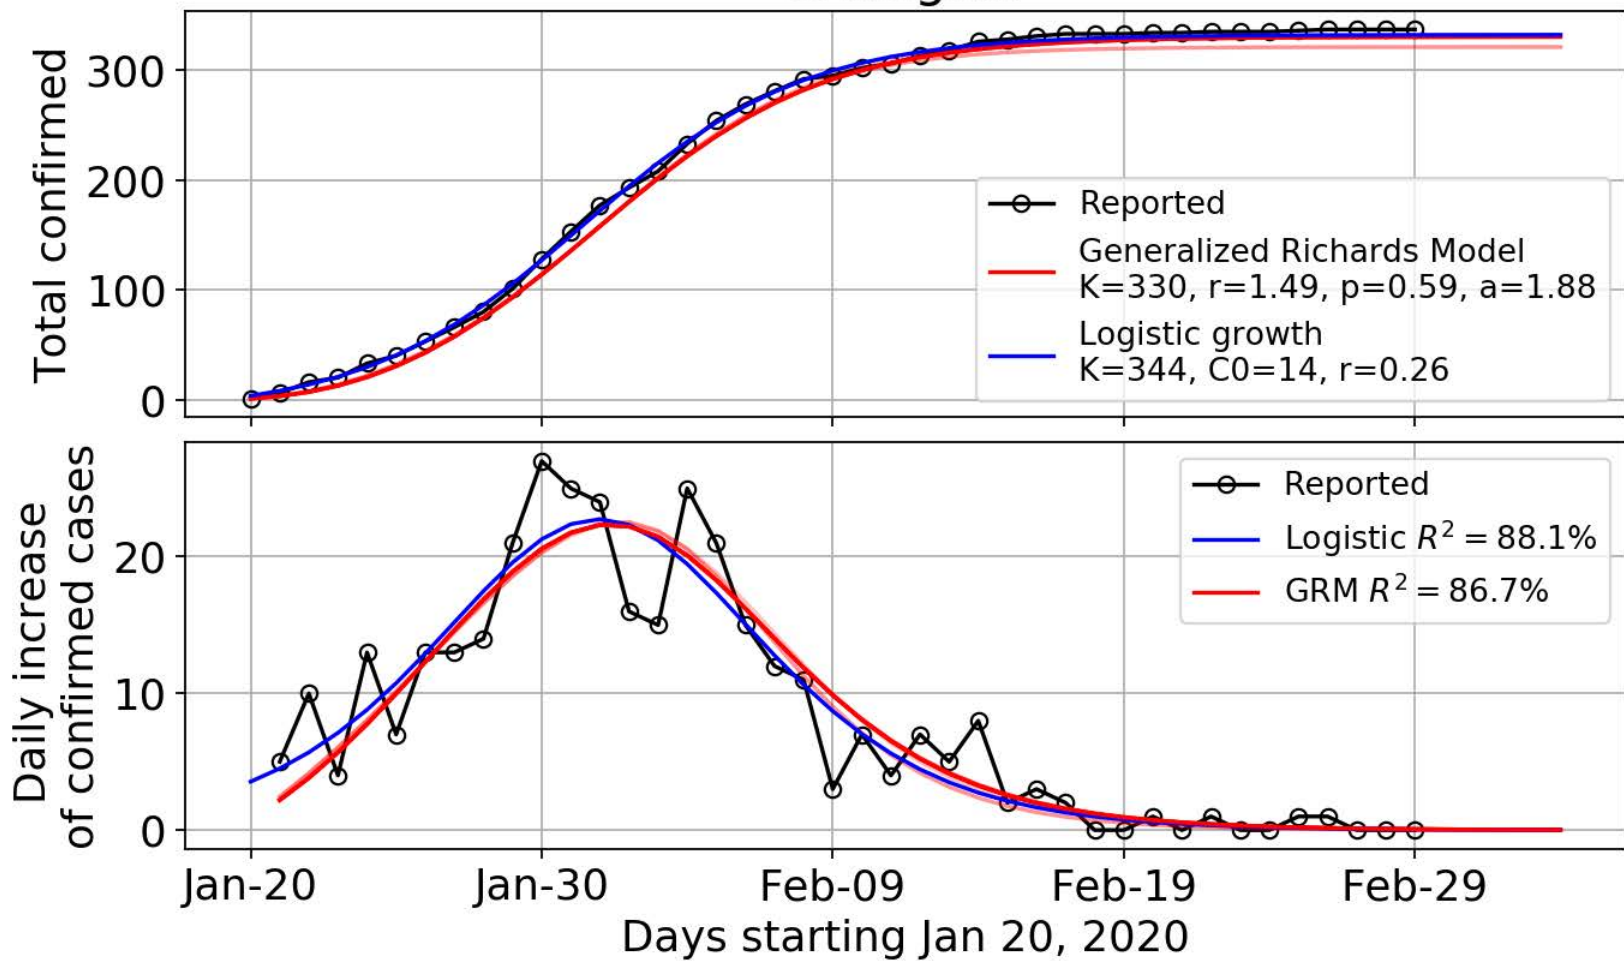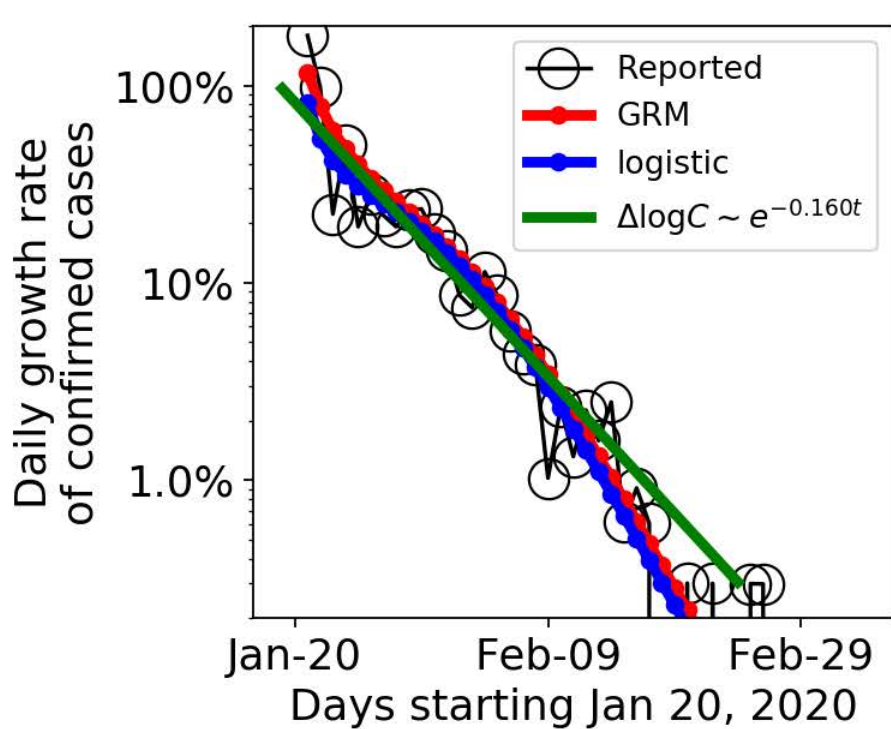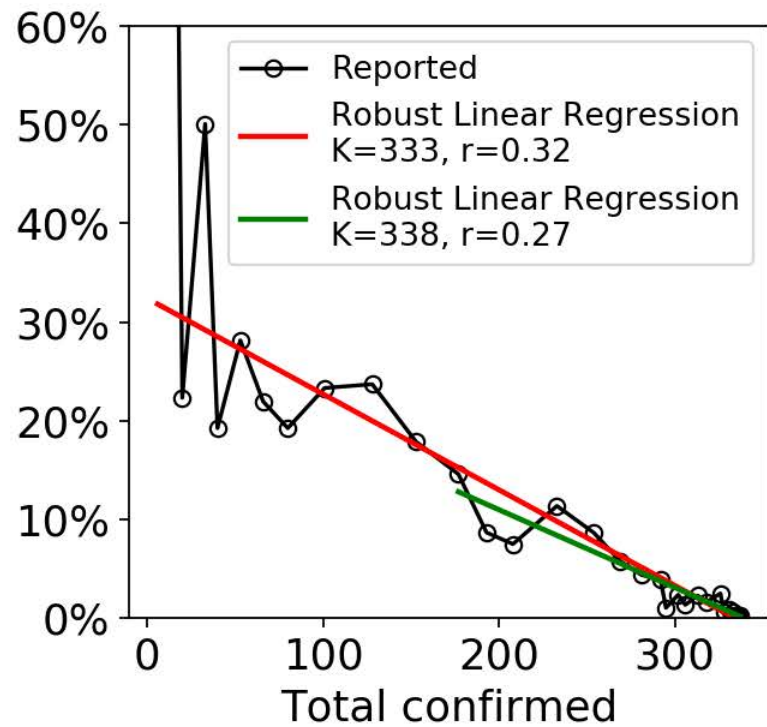

# Hebei

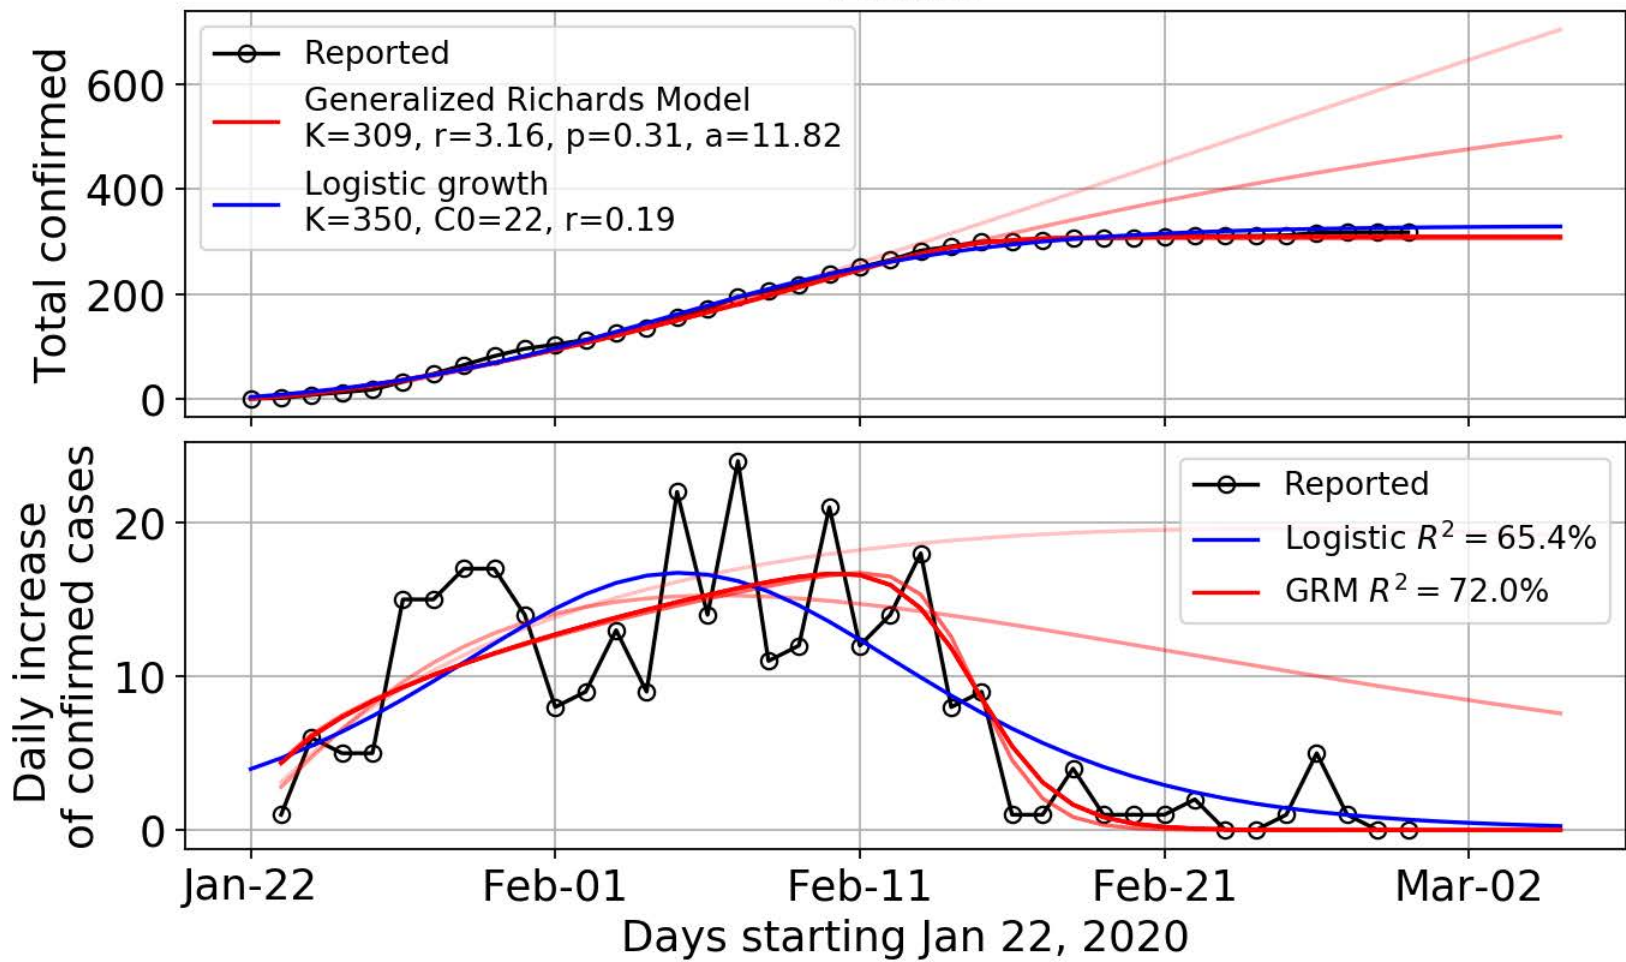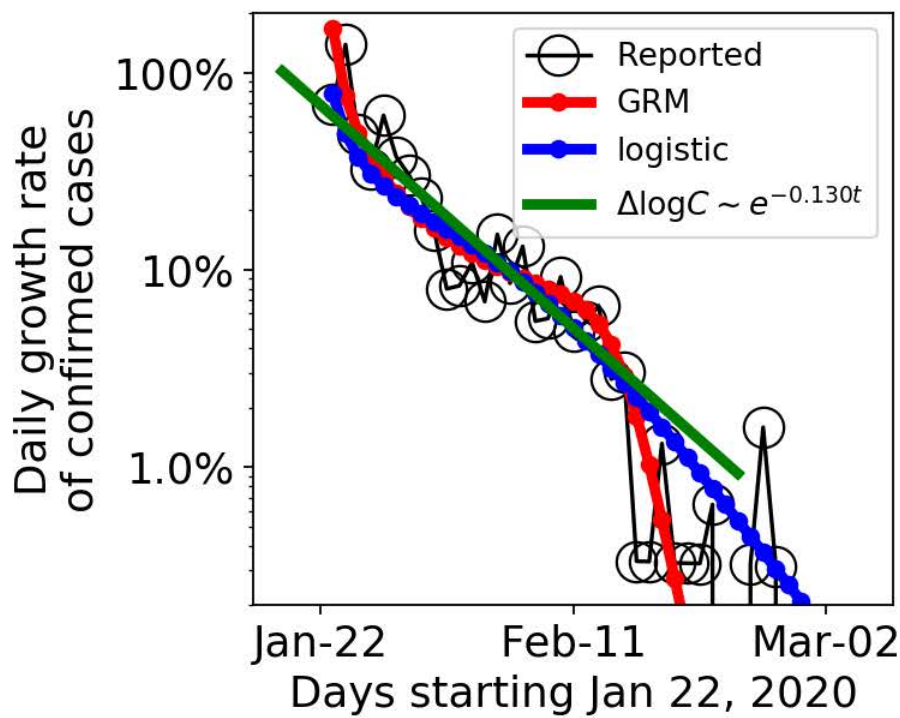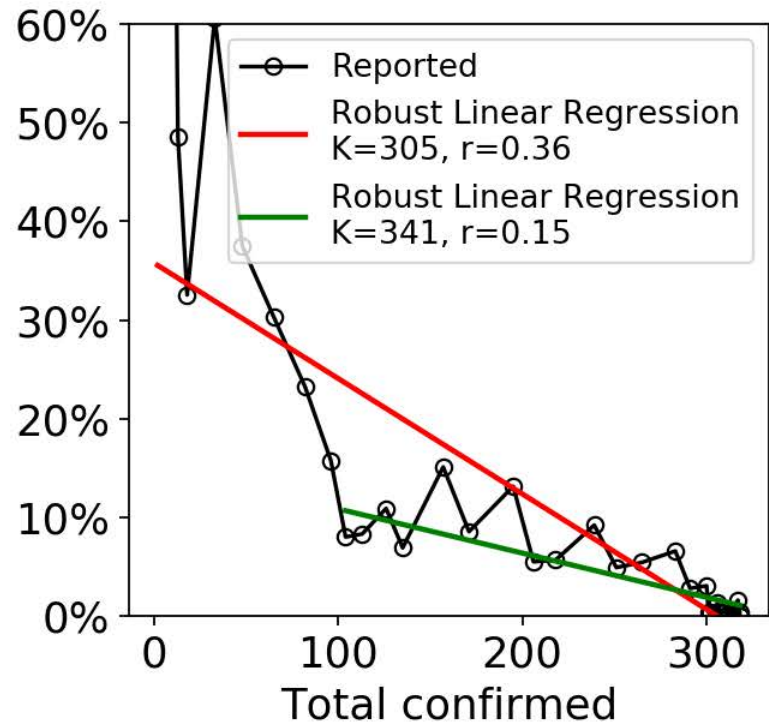

# Fujian

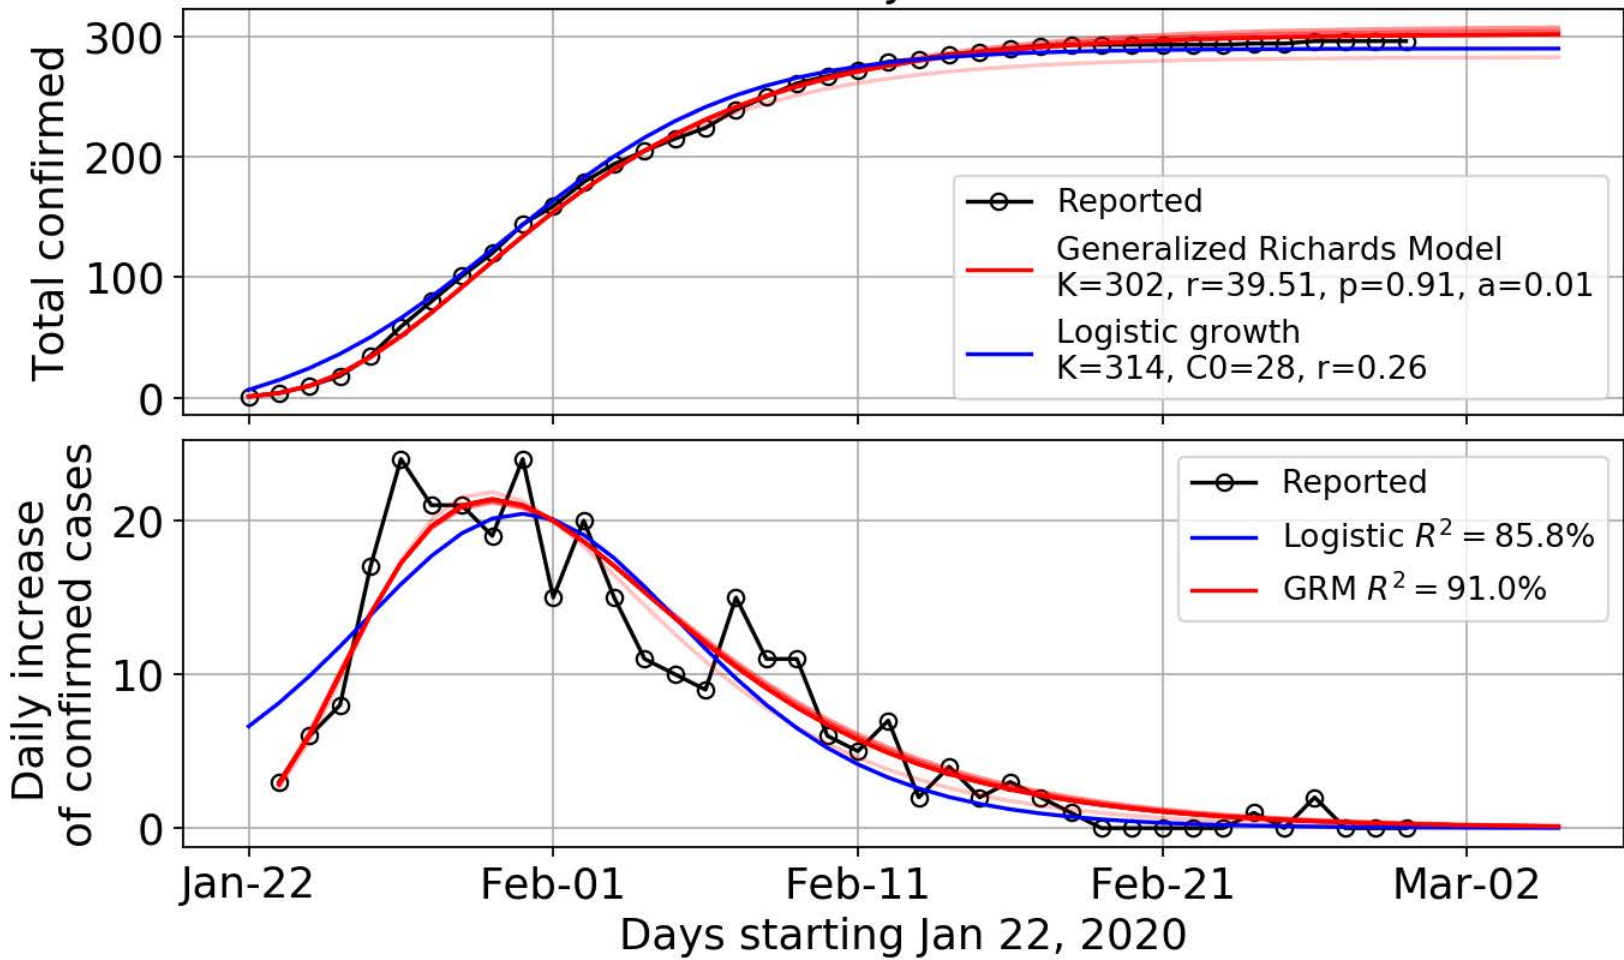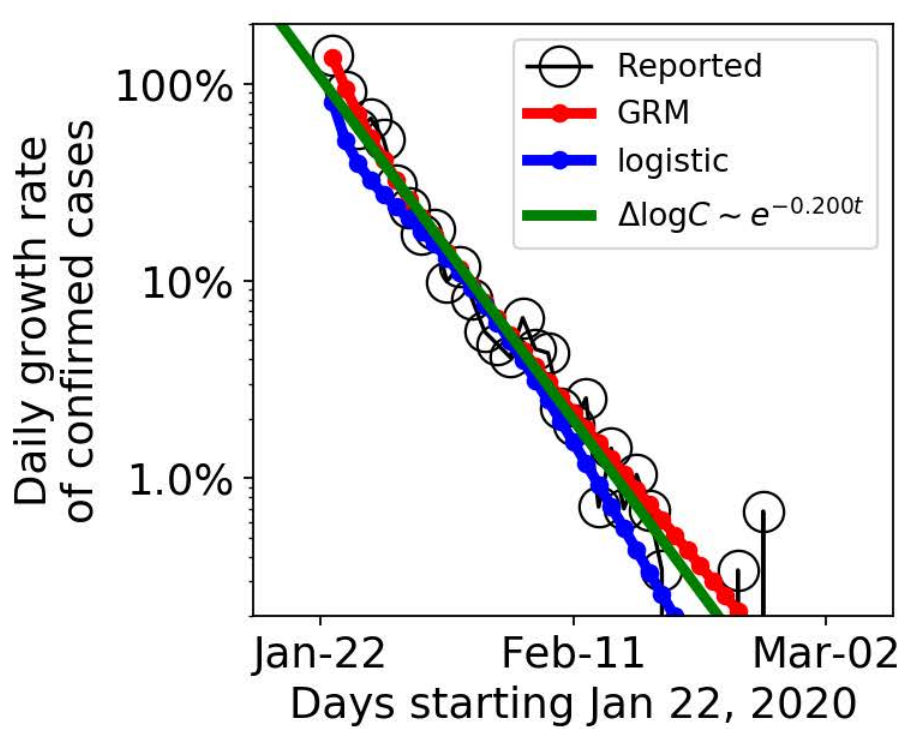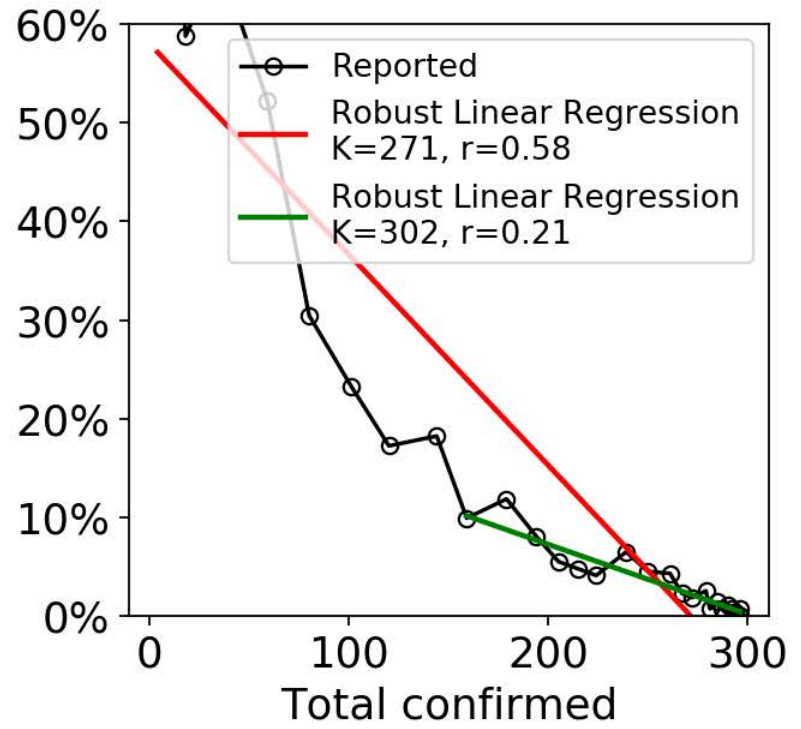

# Guangxi

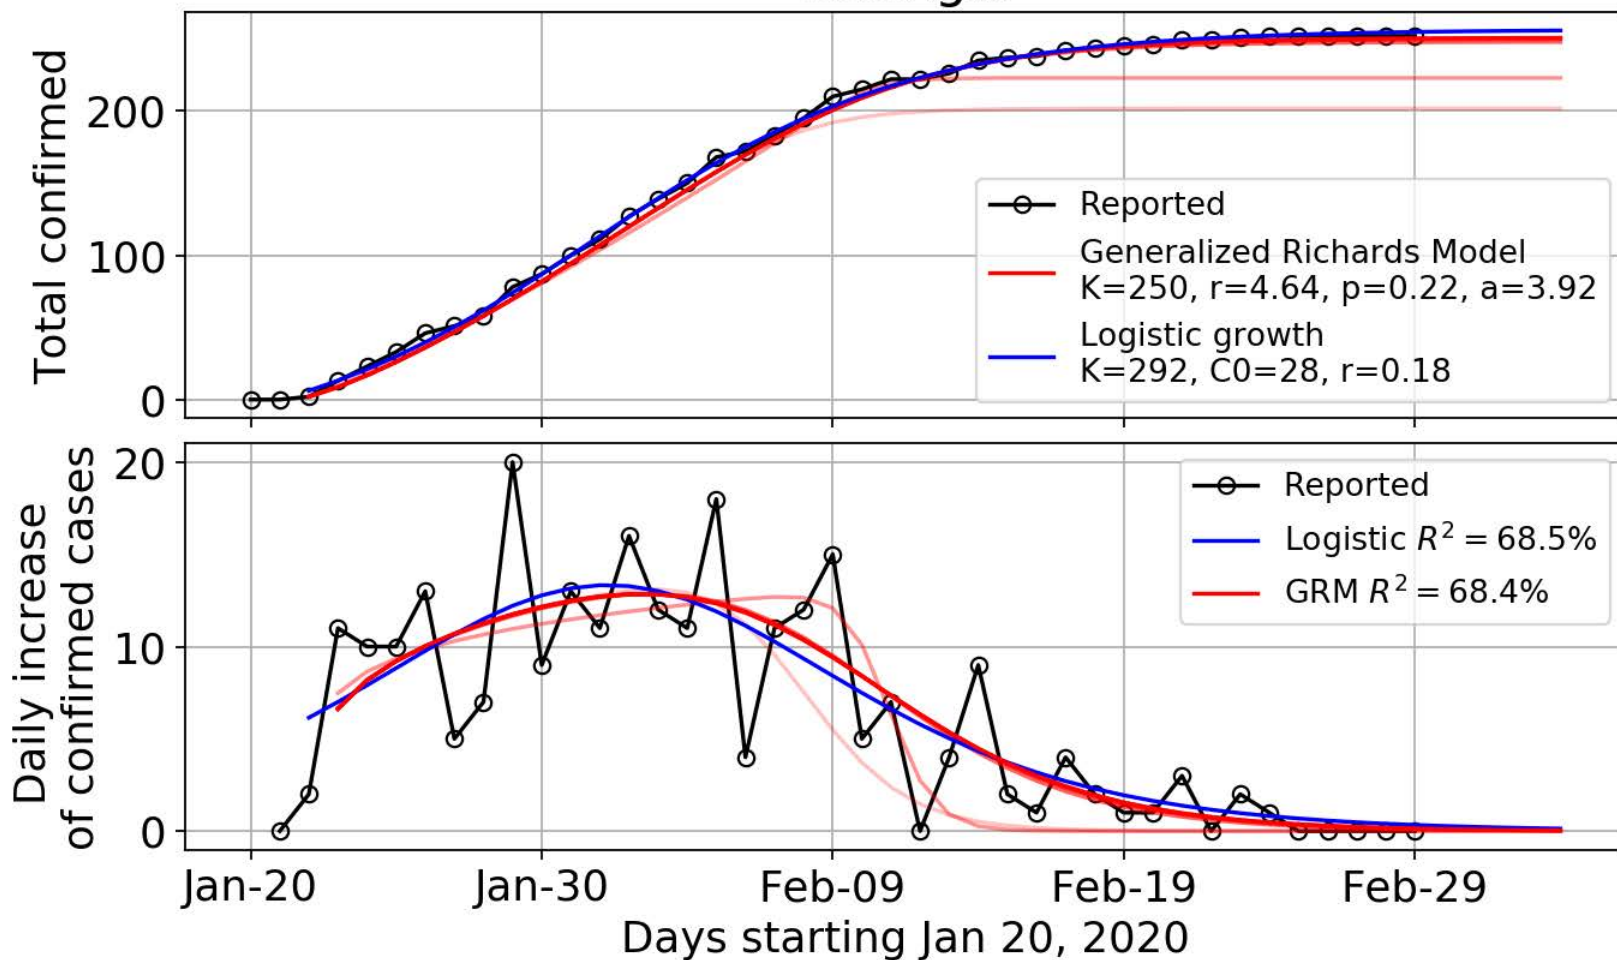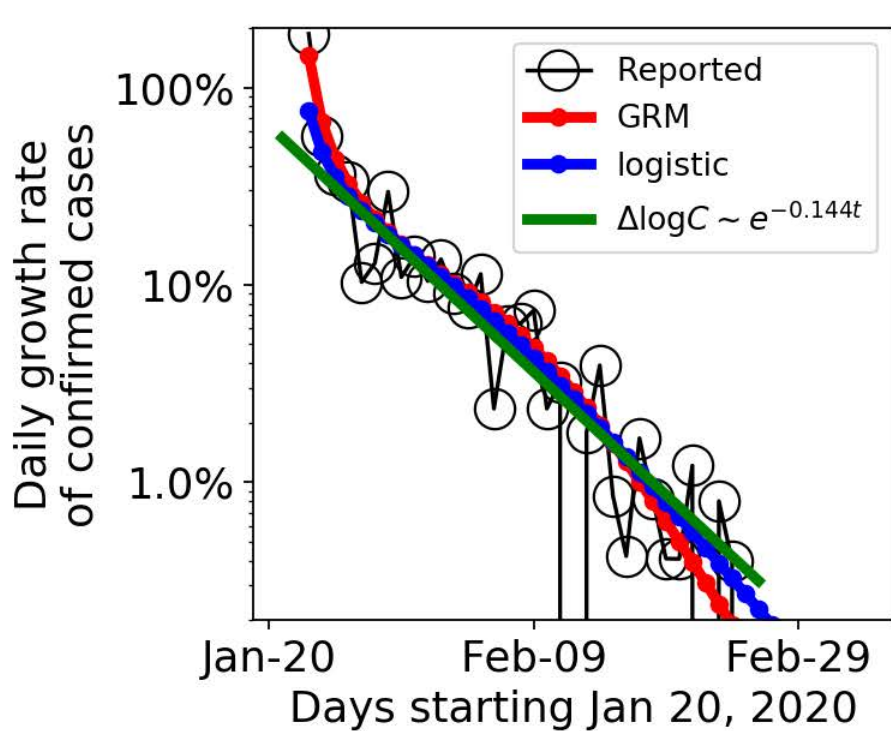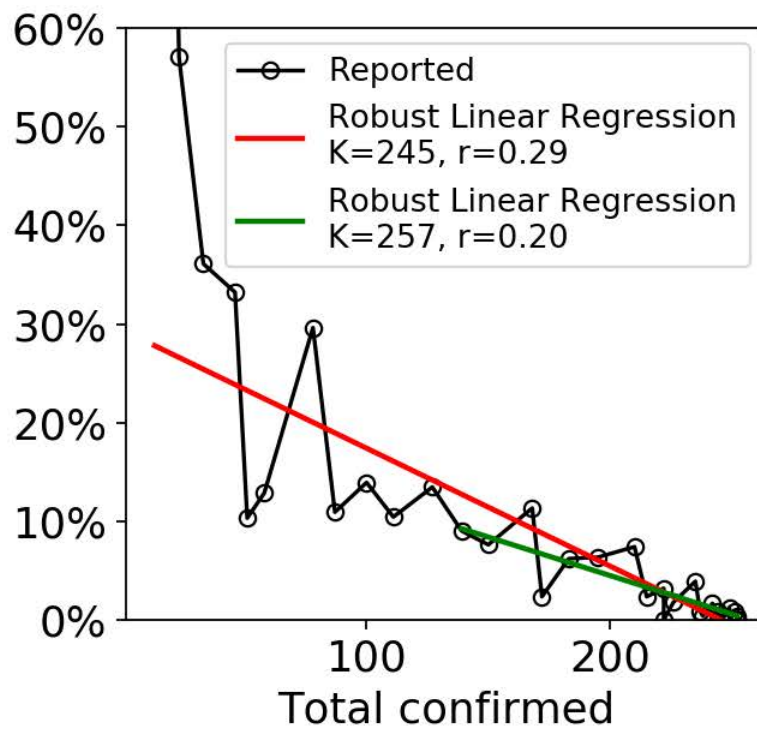



# Shaanxi

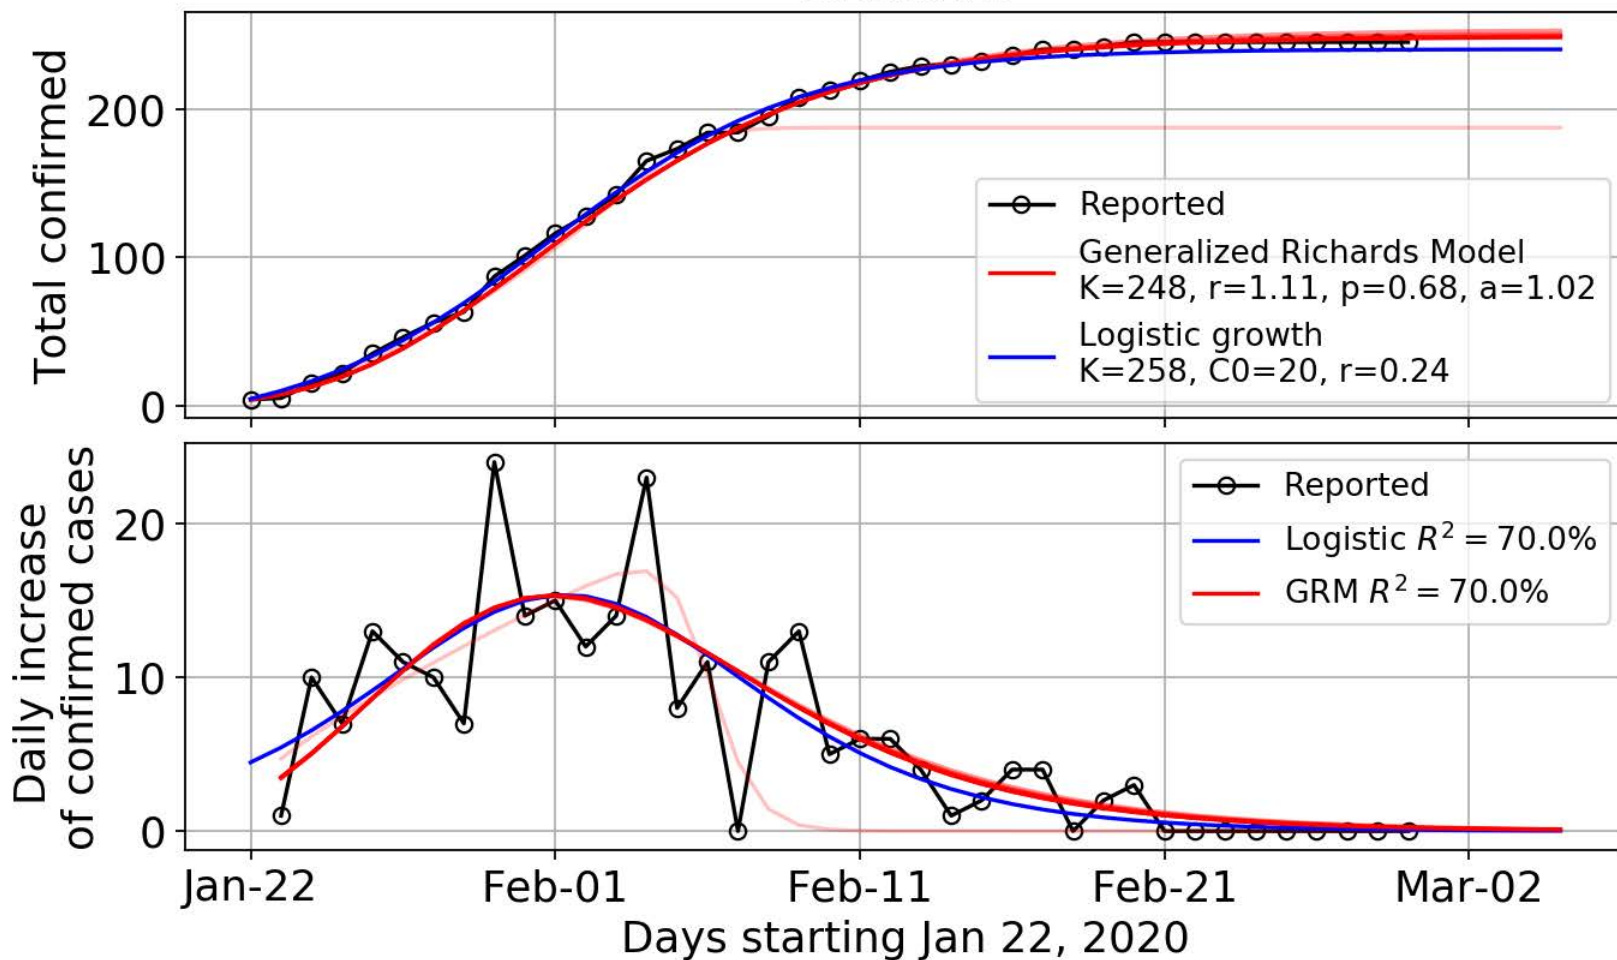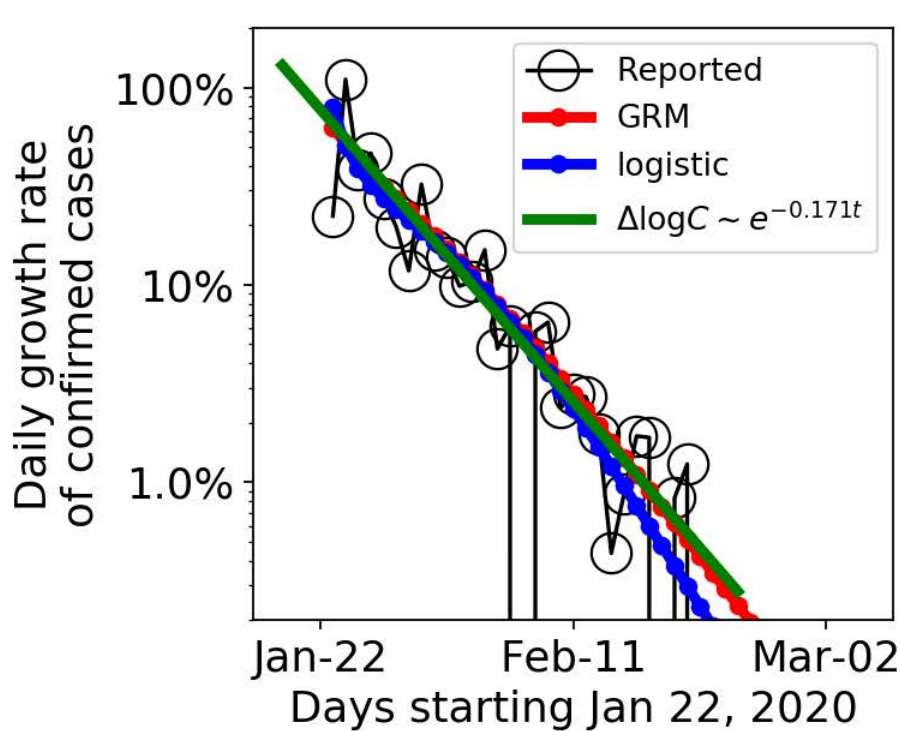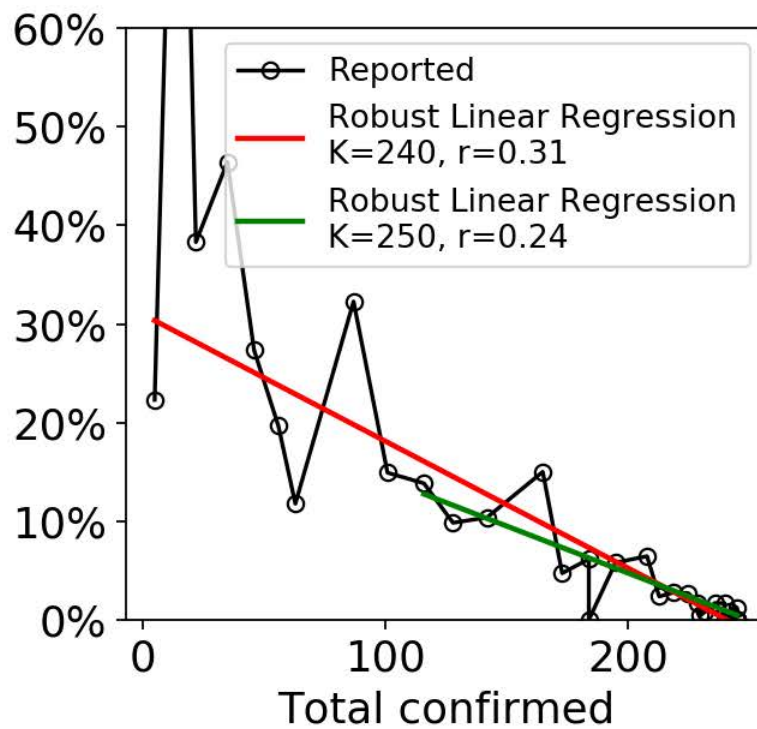

# Yunnan

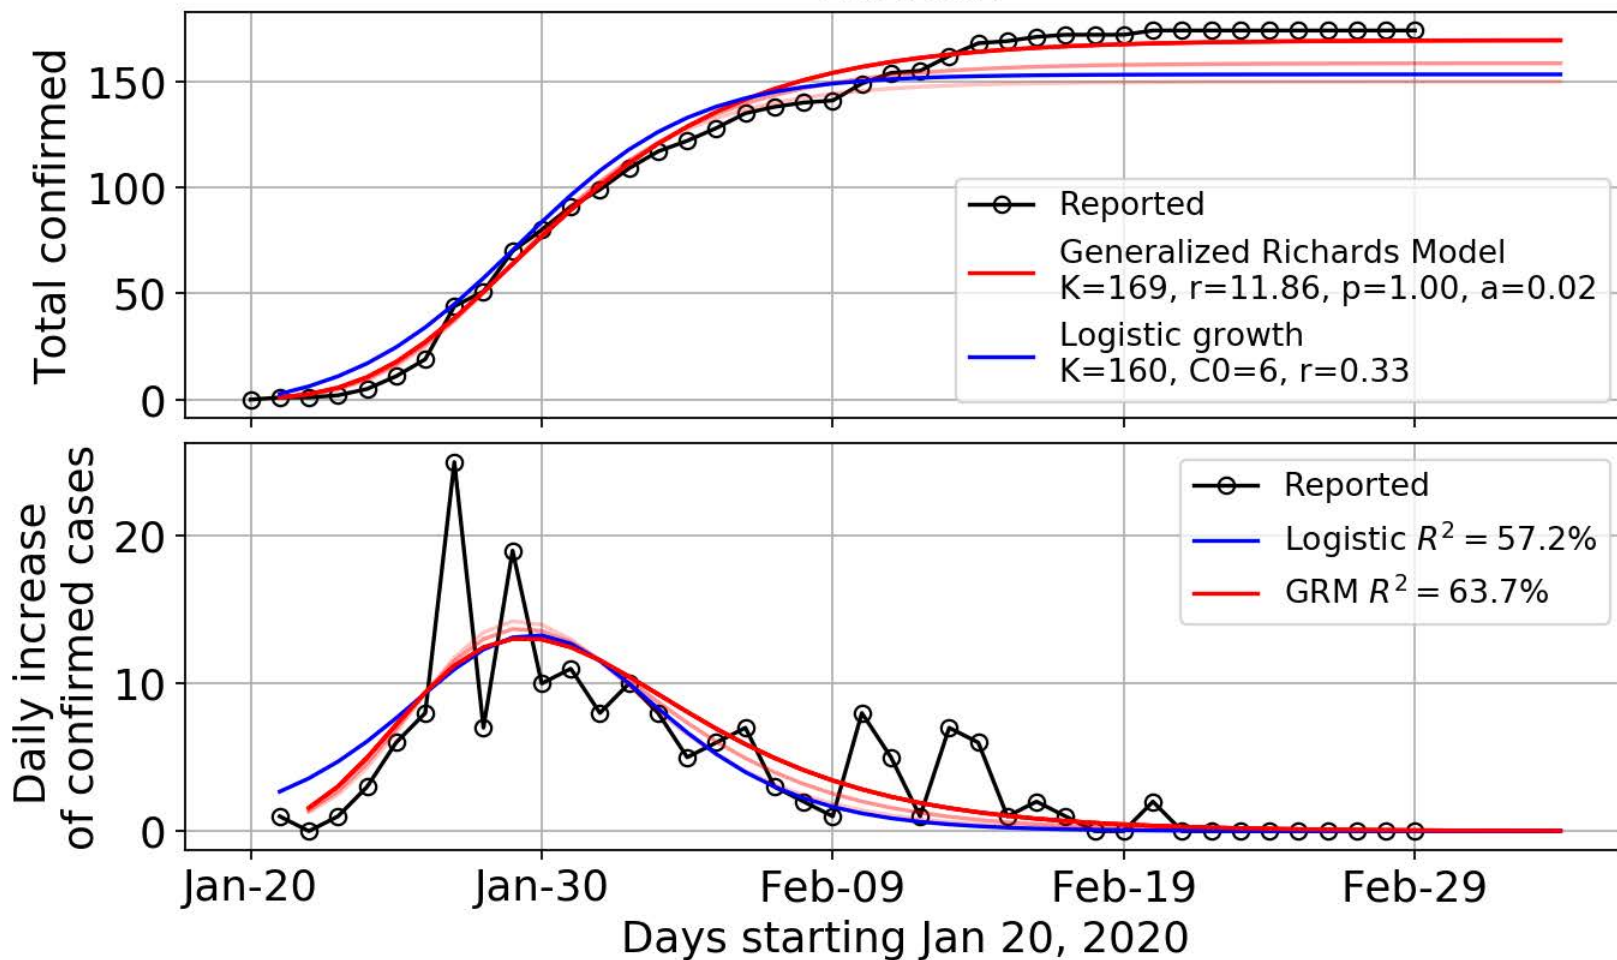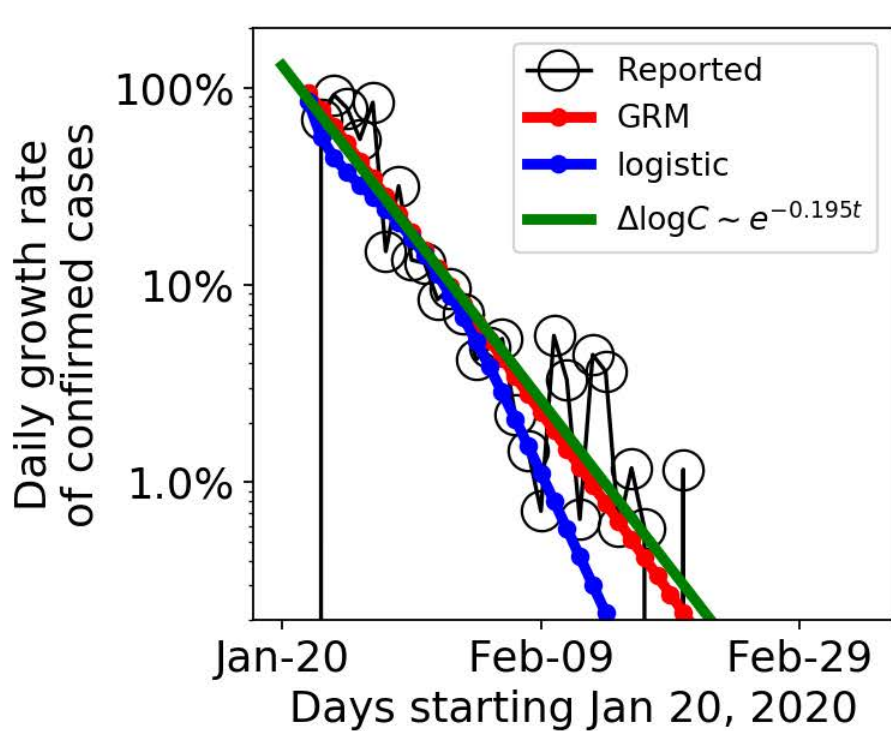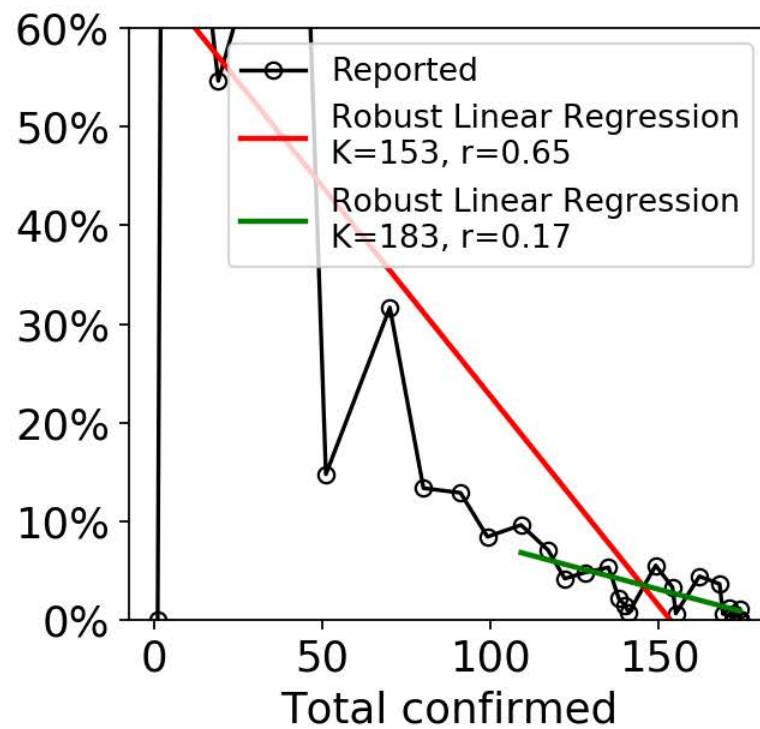

# Hainan

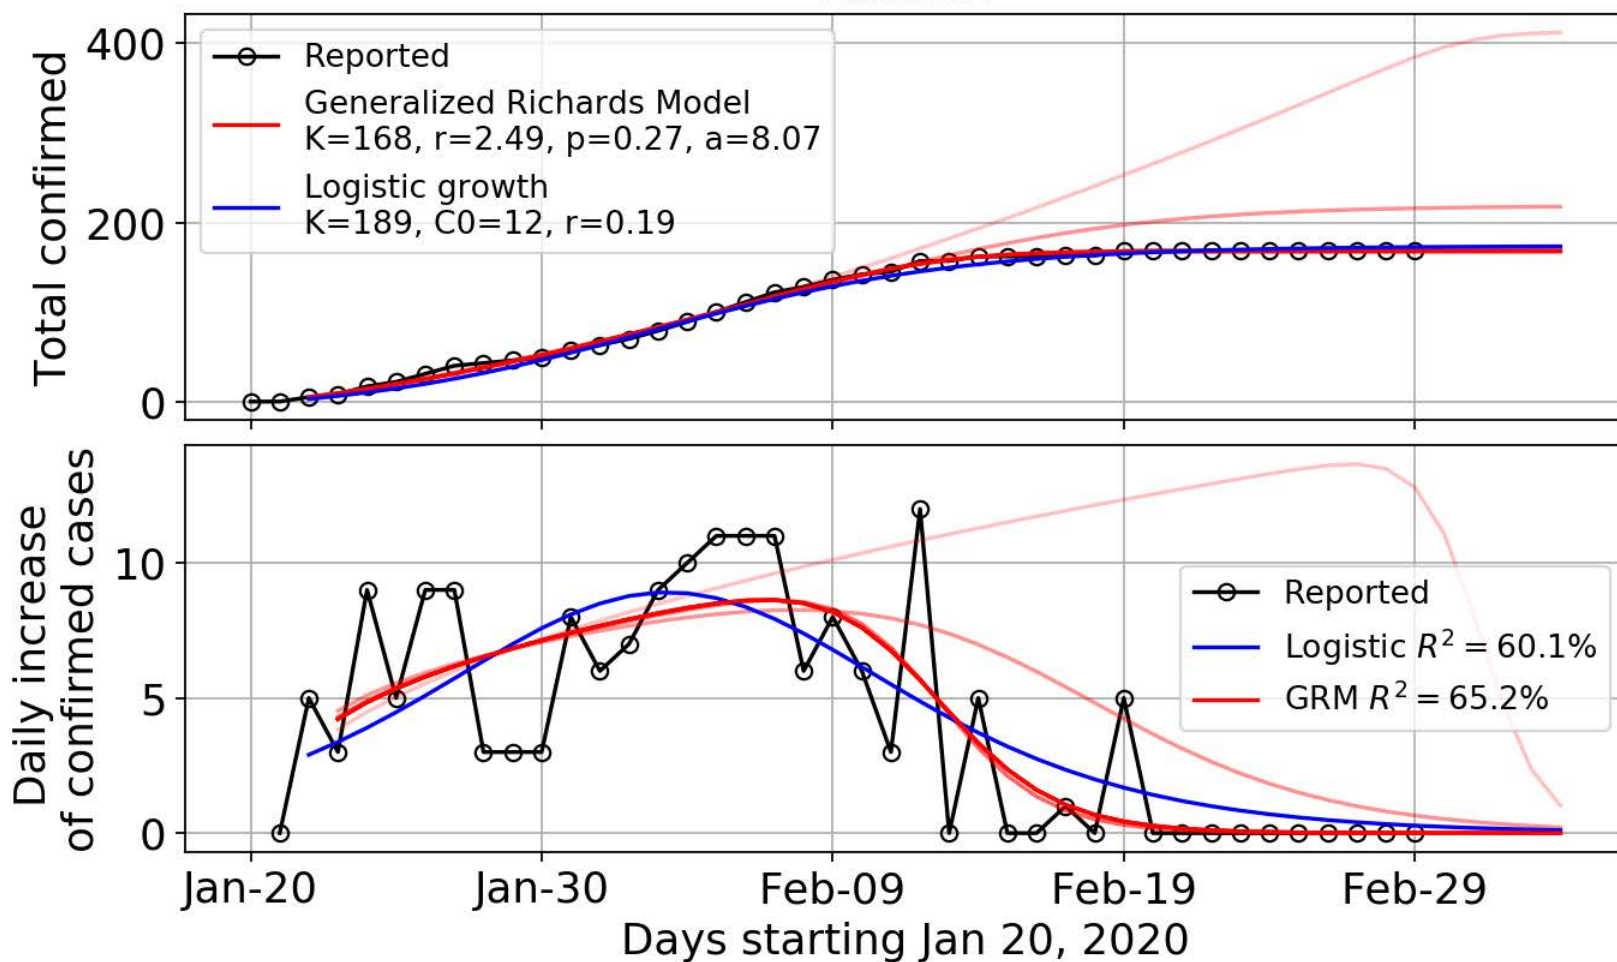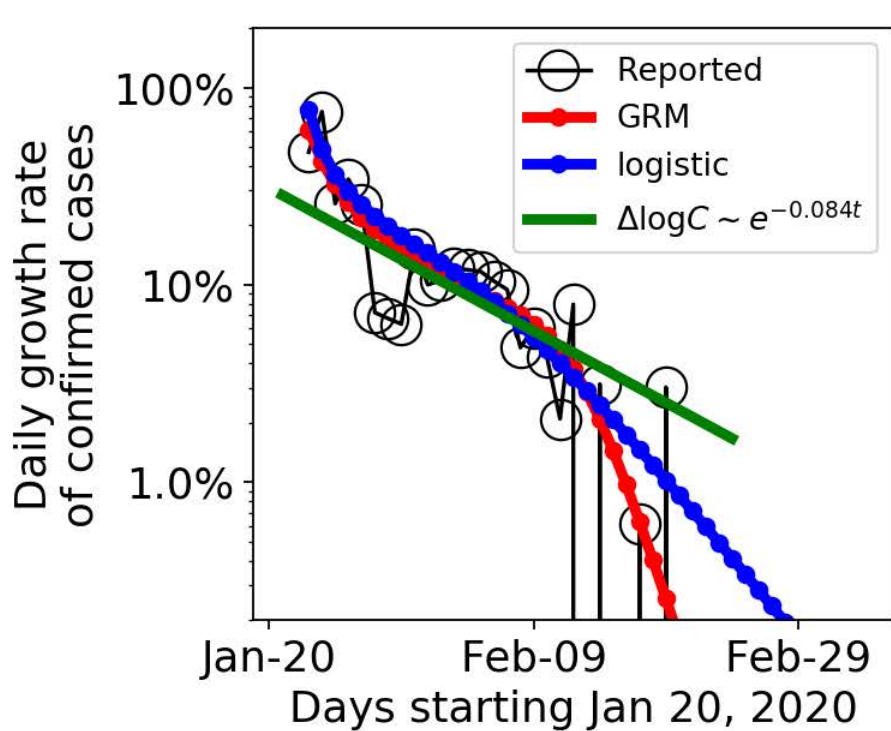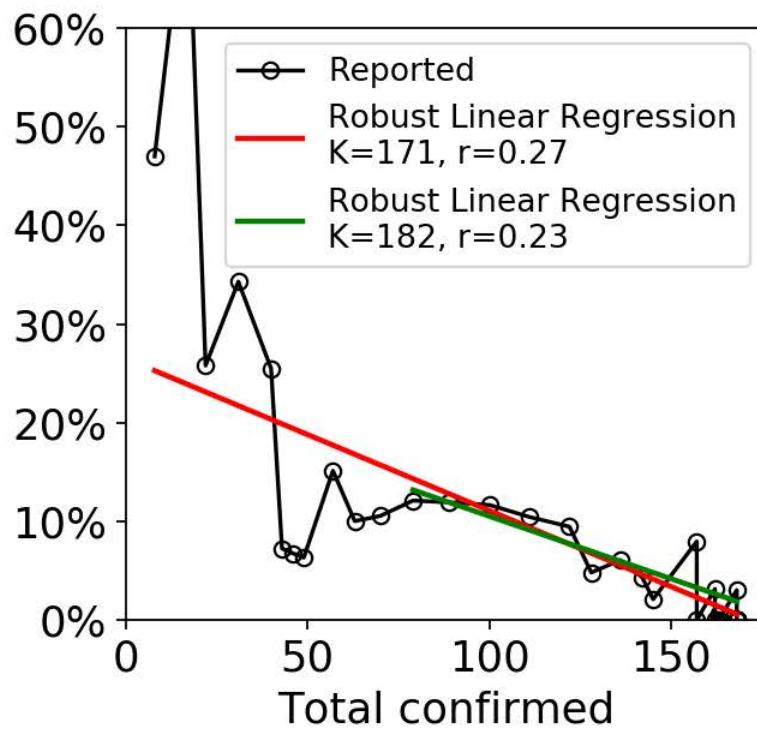

# Guizhou

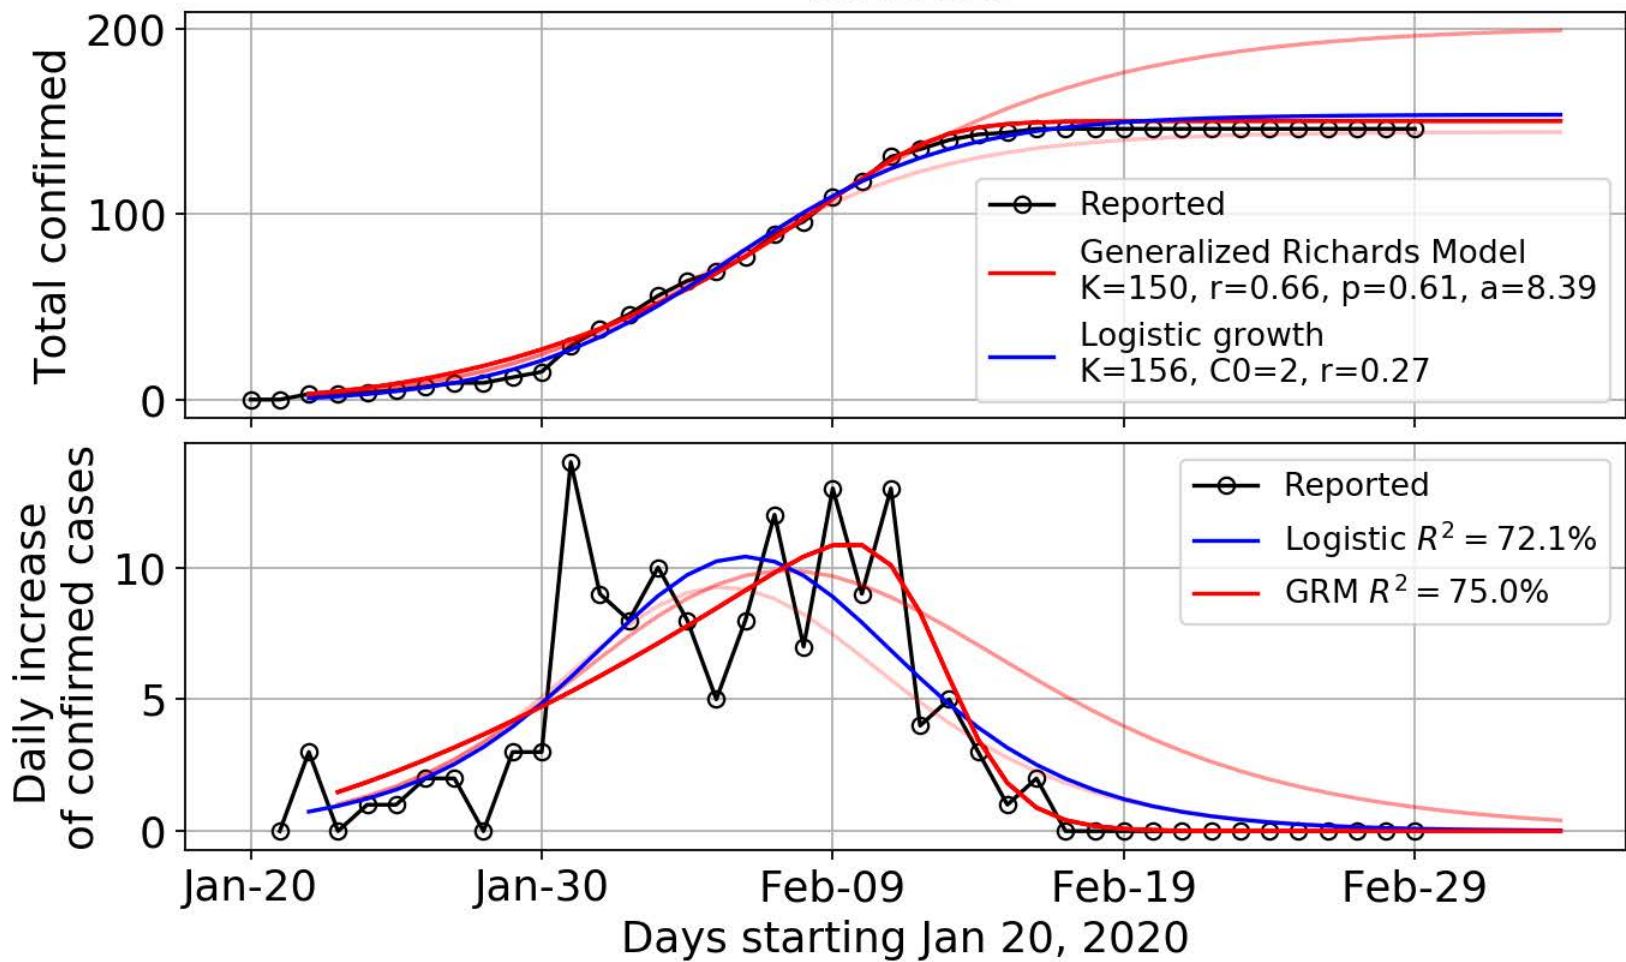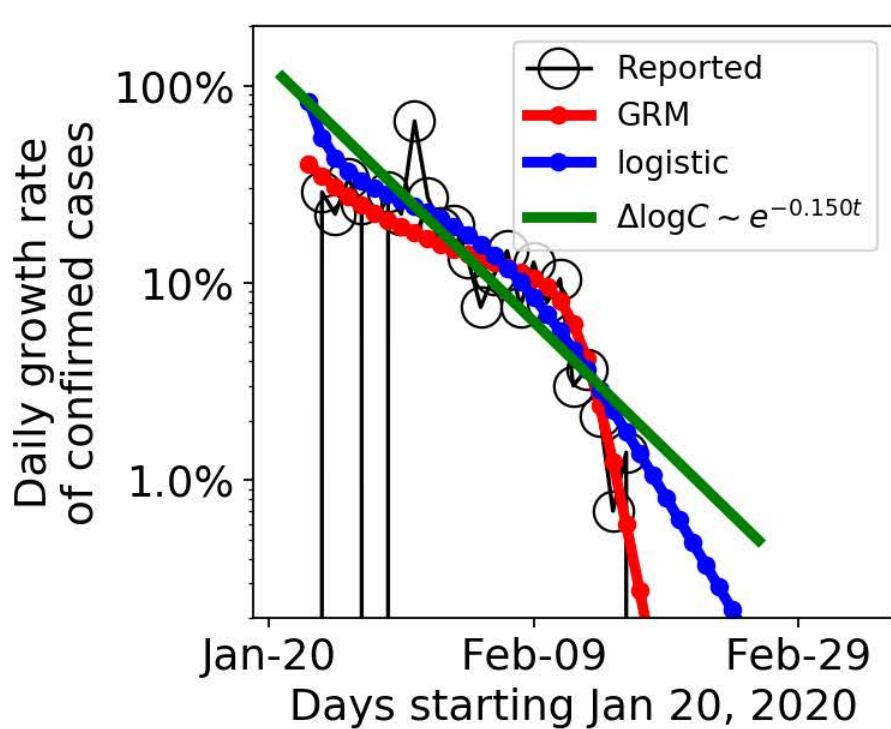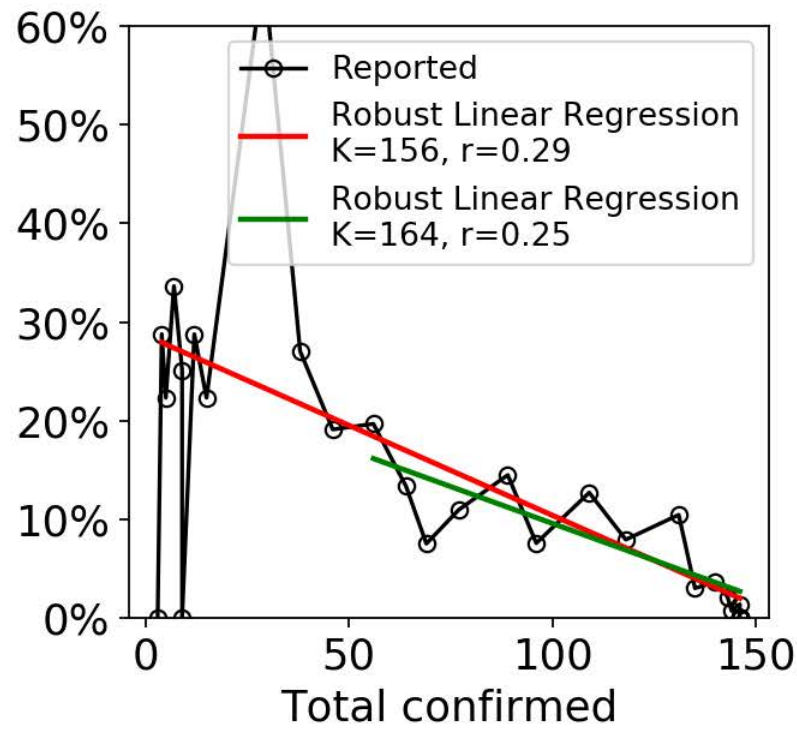

# Tianjin

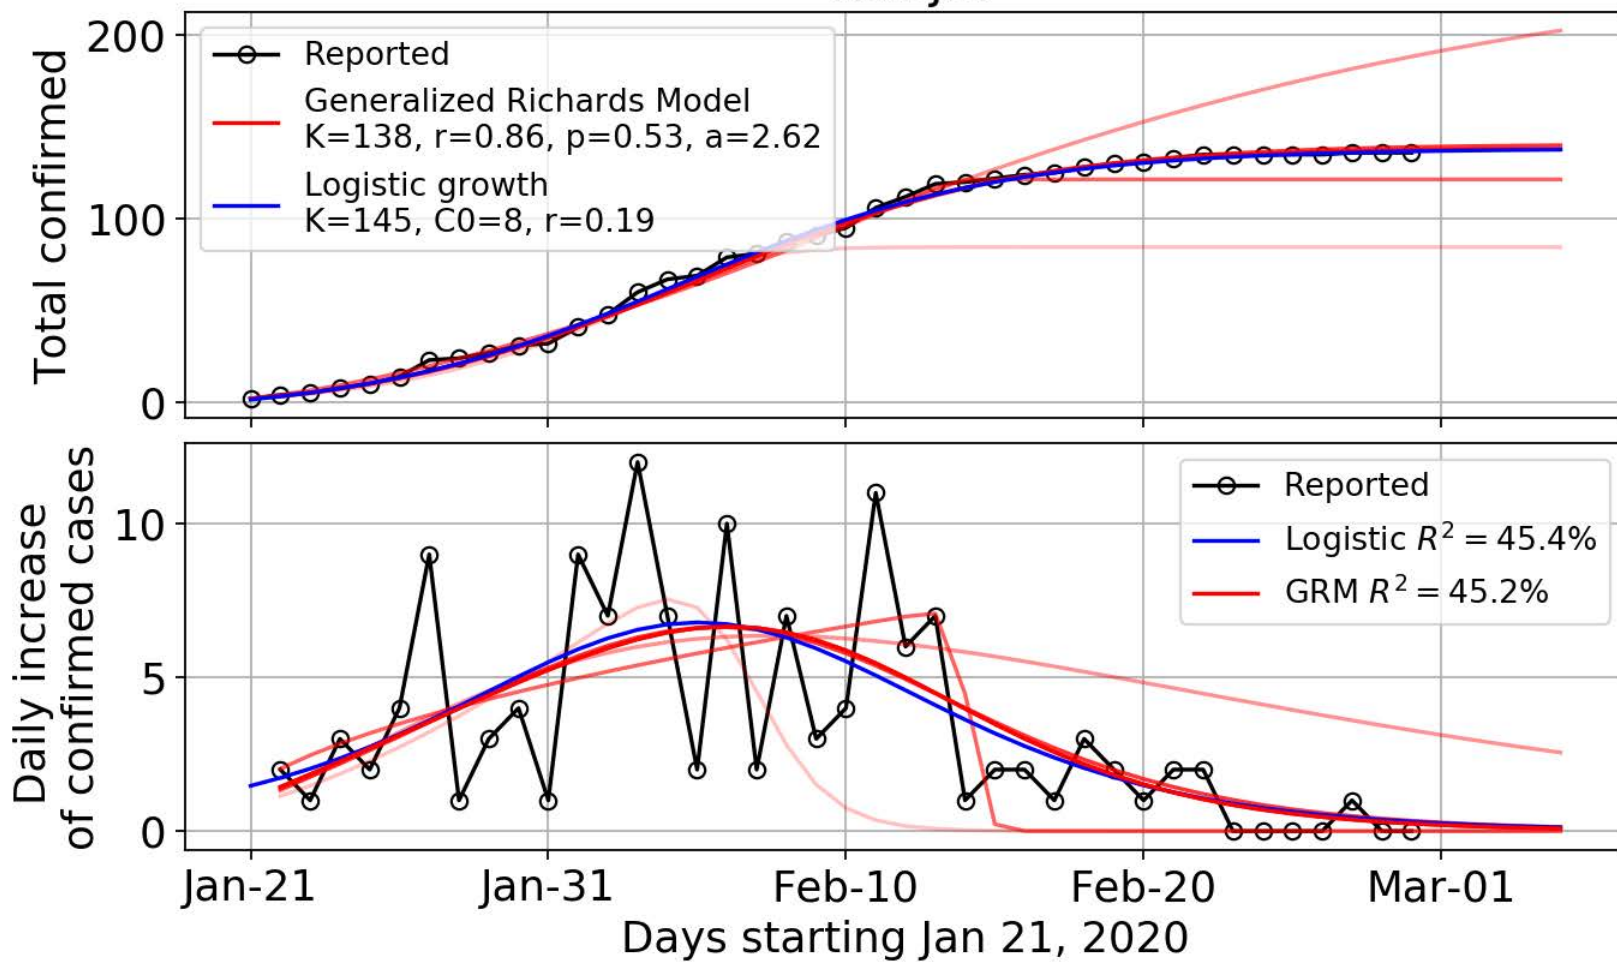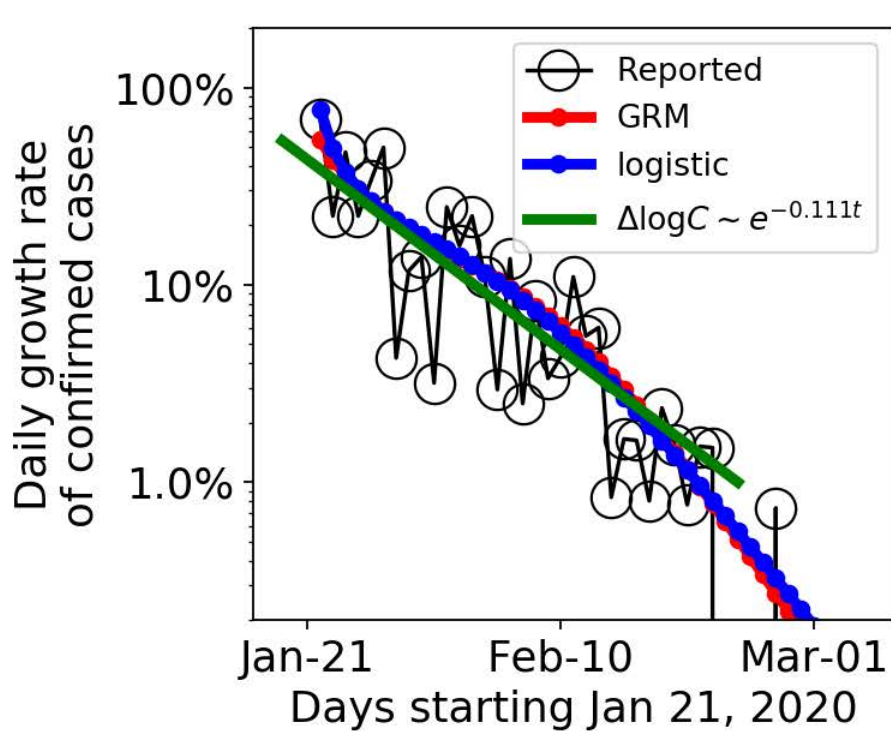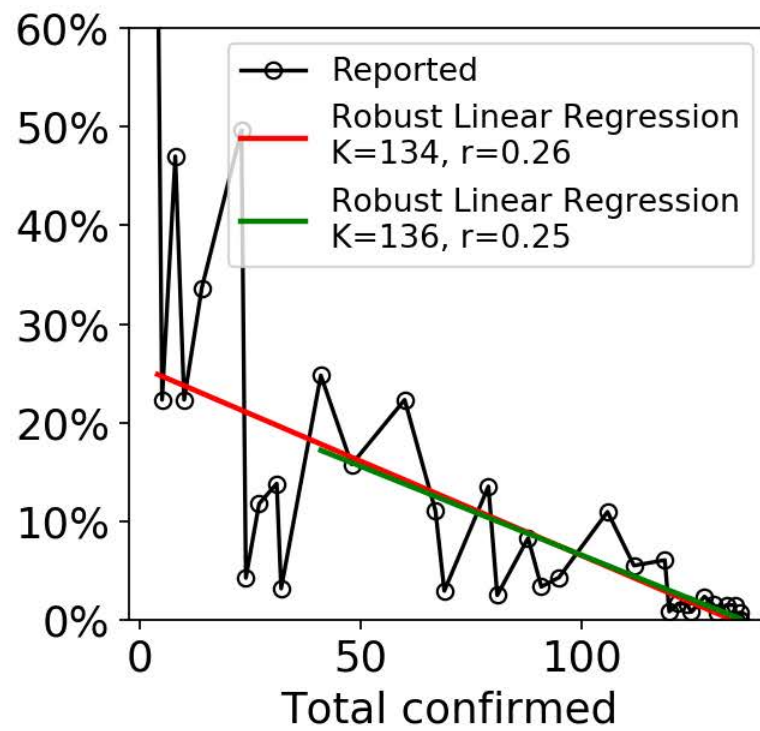

# Shanxi

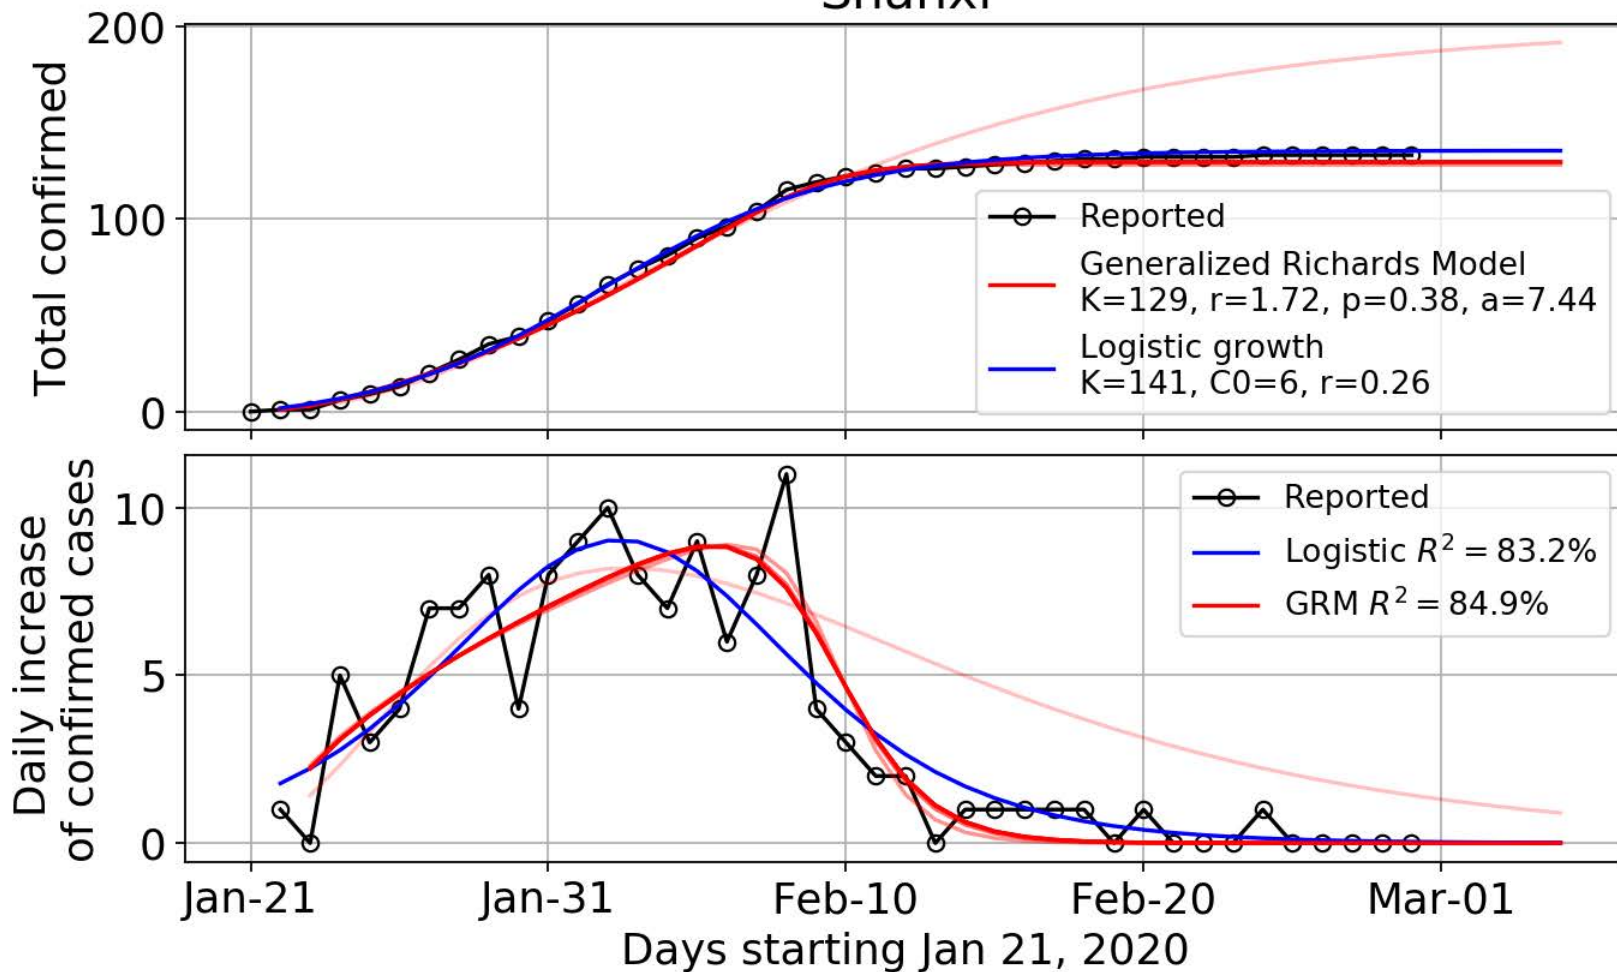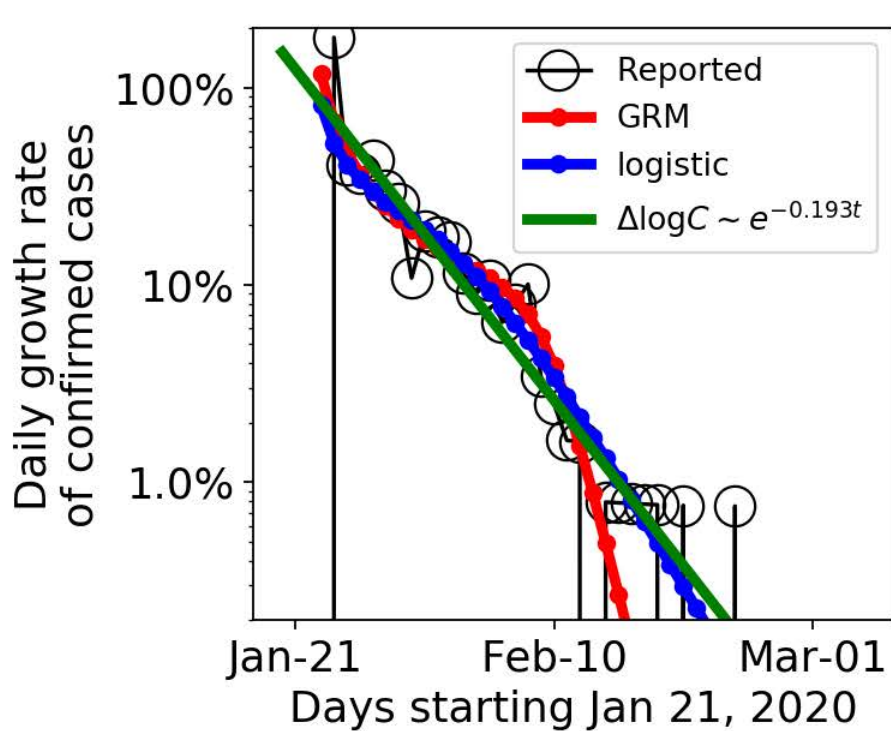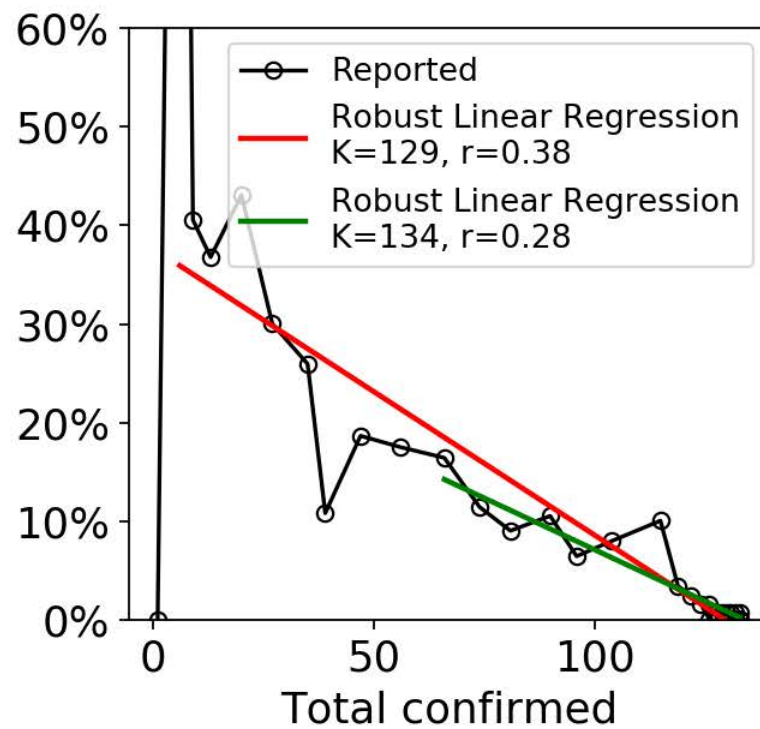

# Liaoning

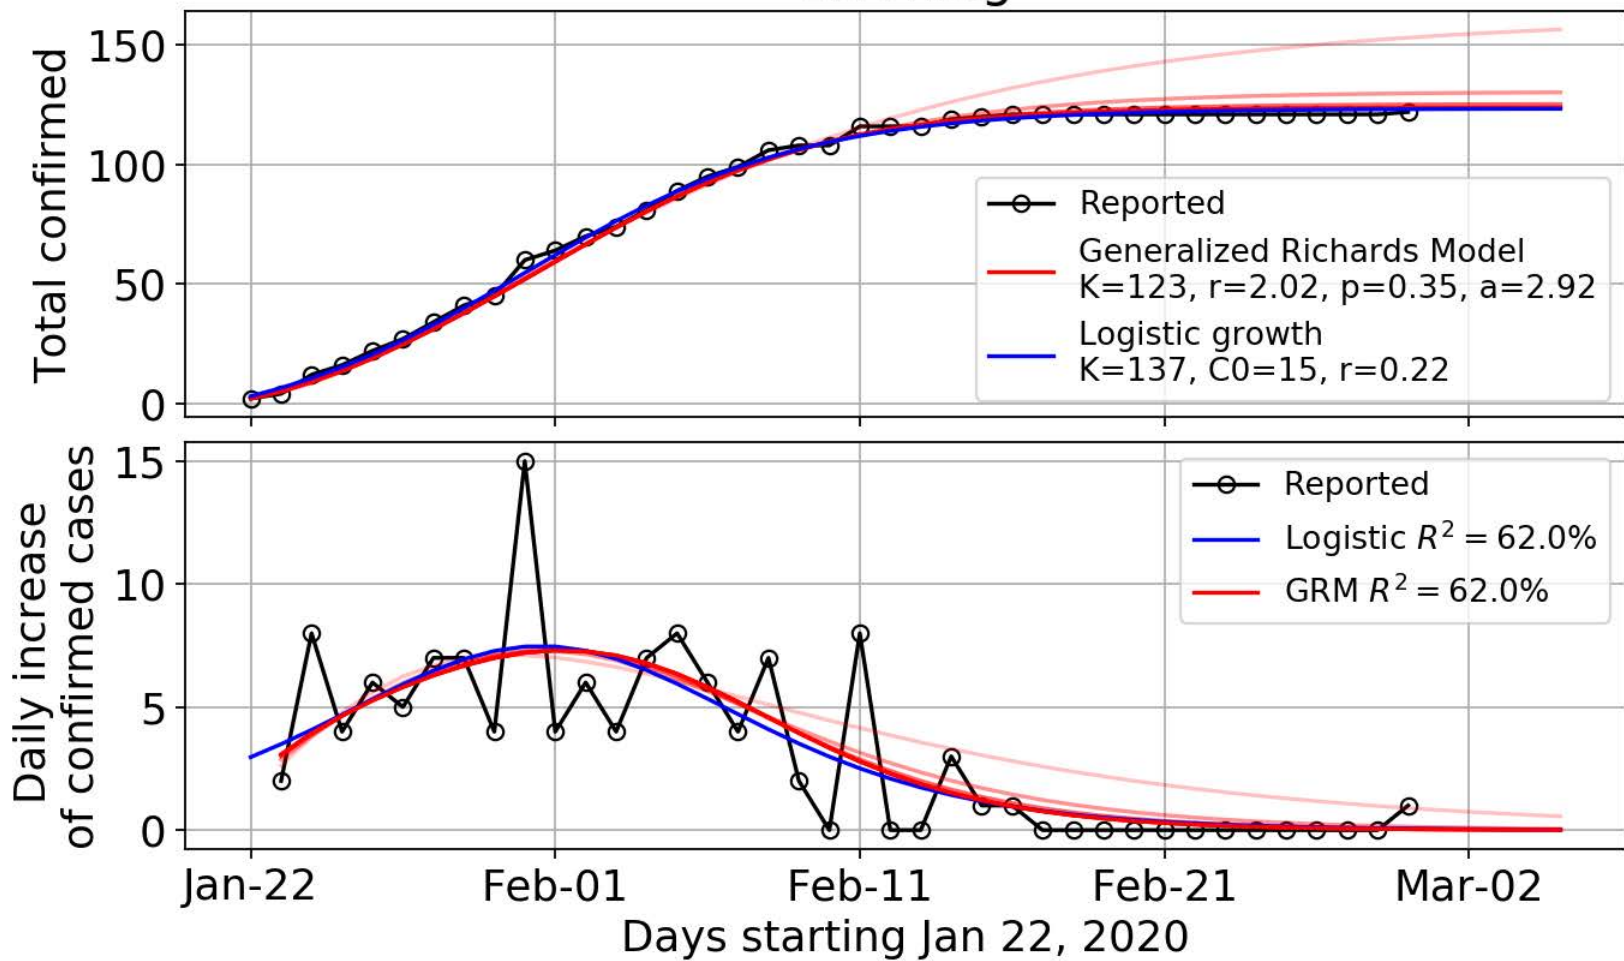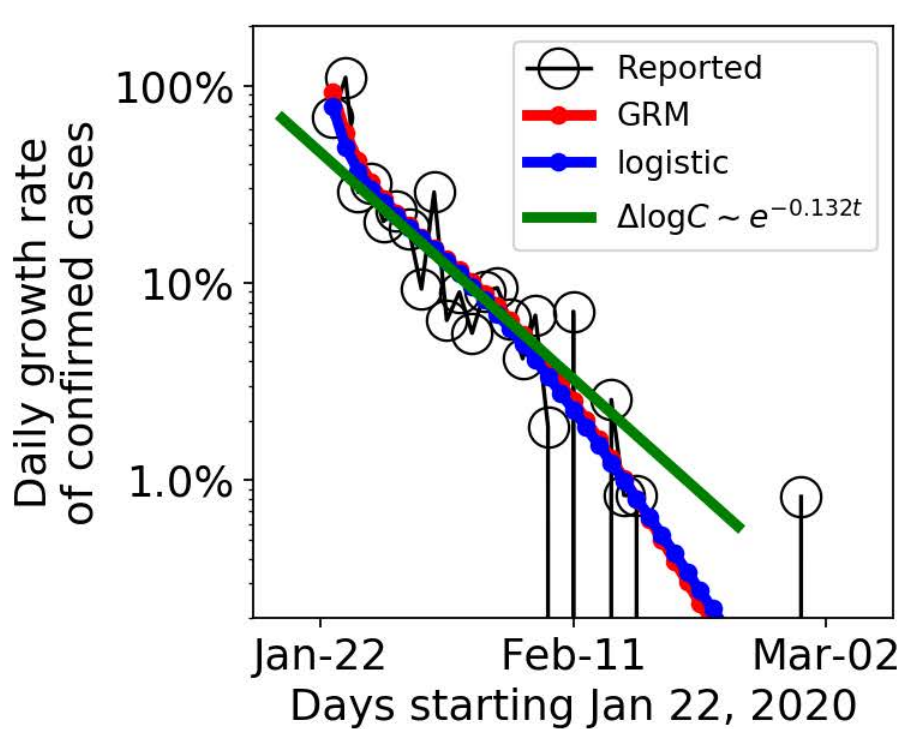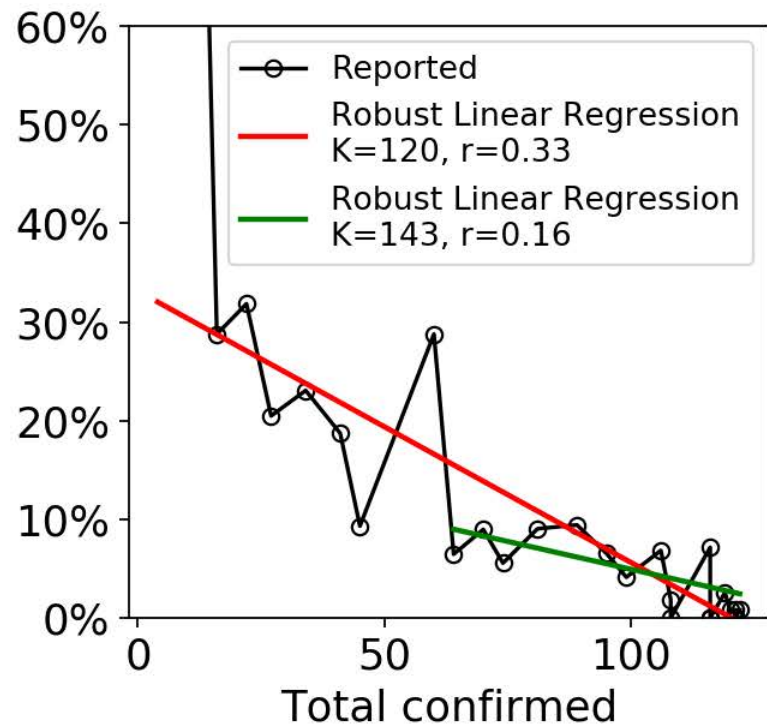

# Gansu

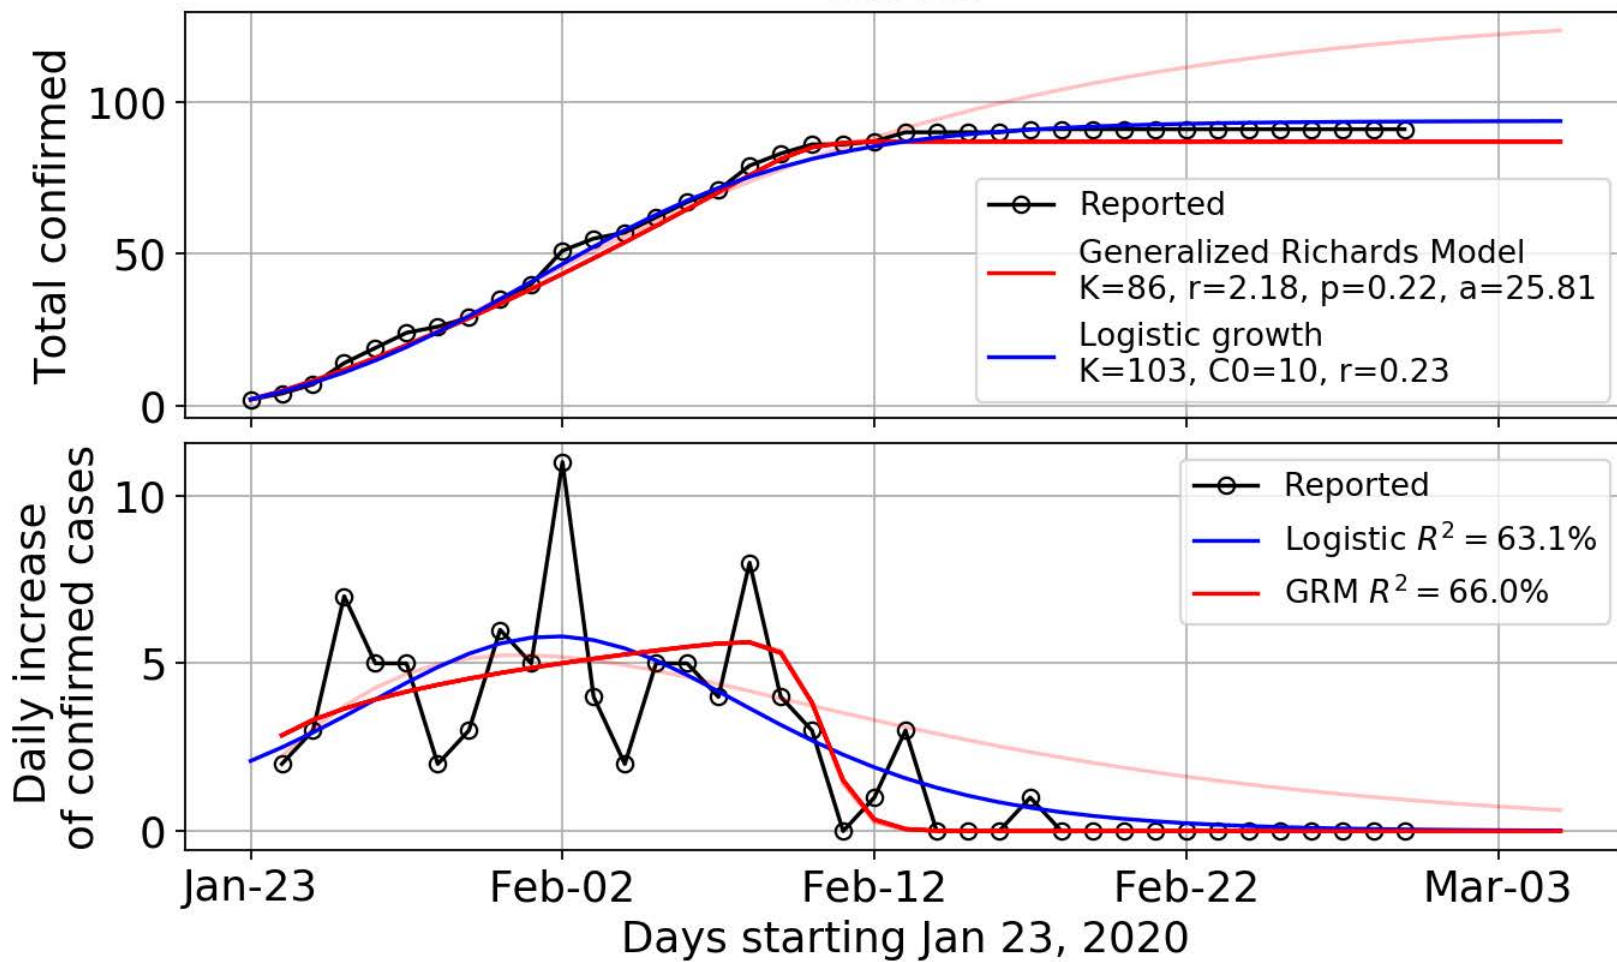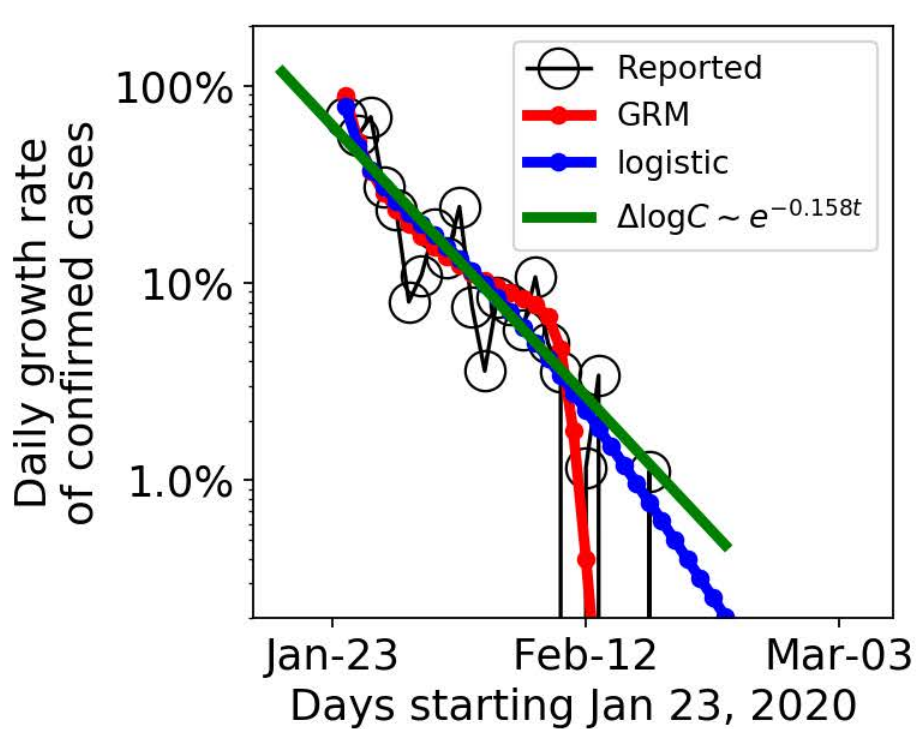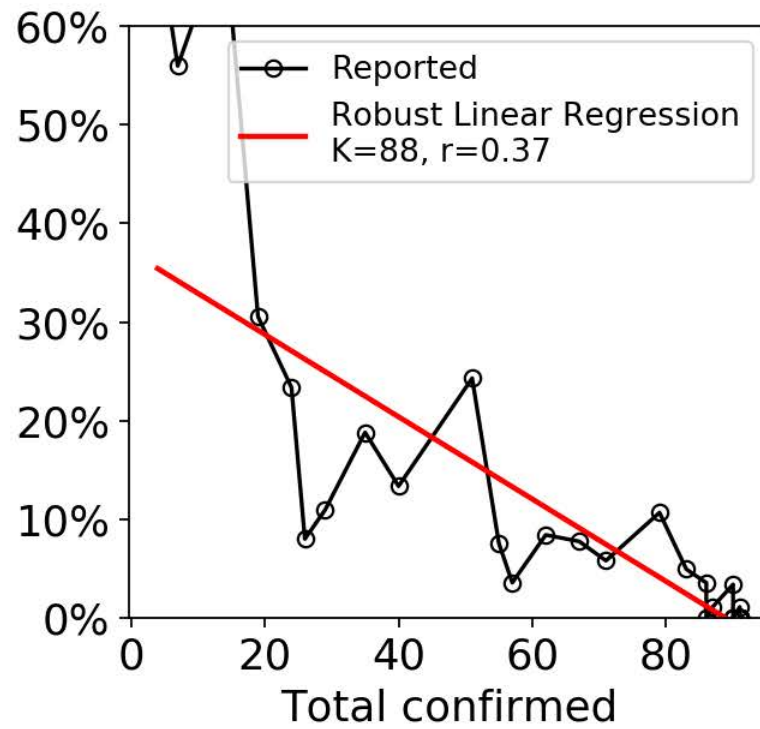



# Jilin

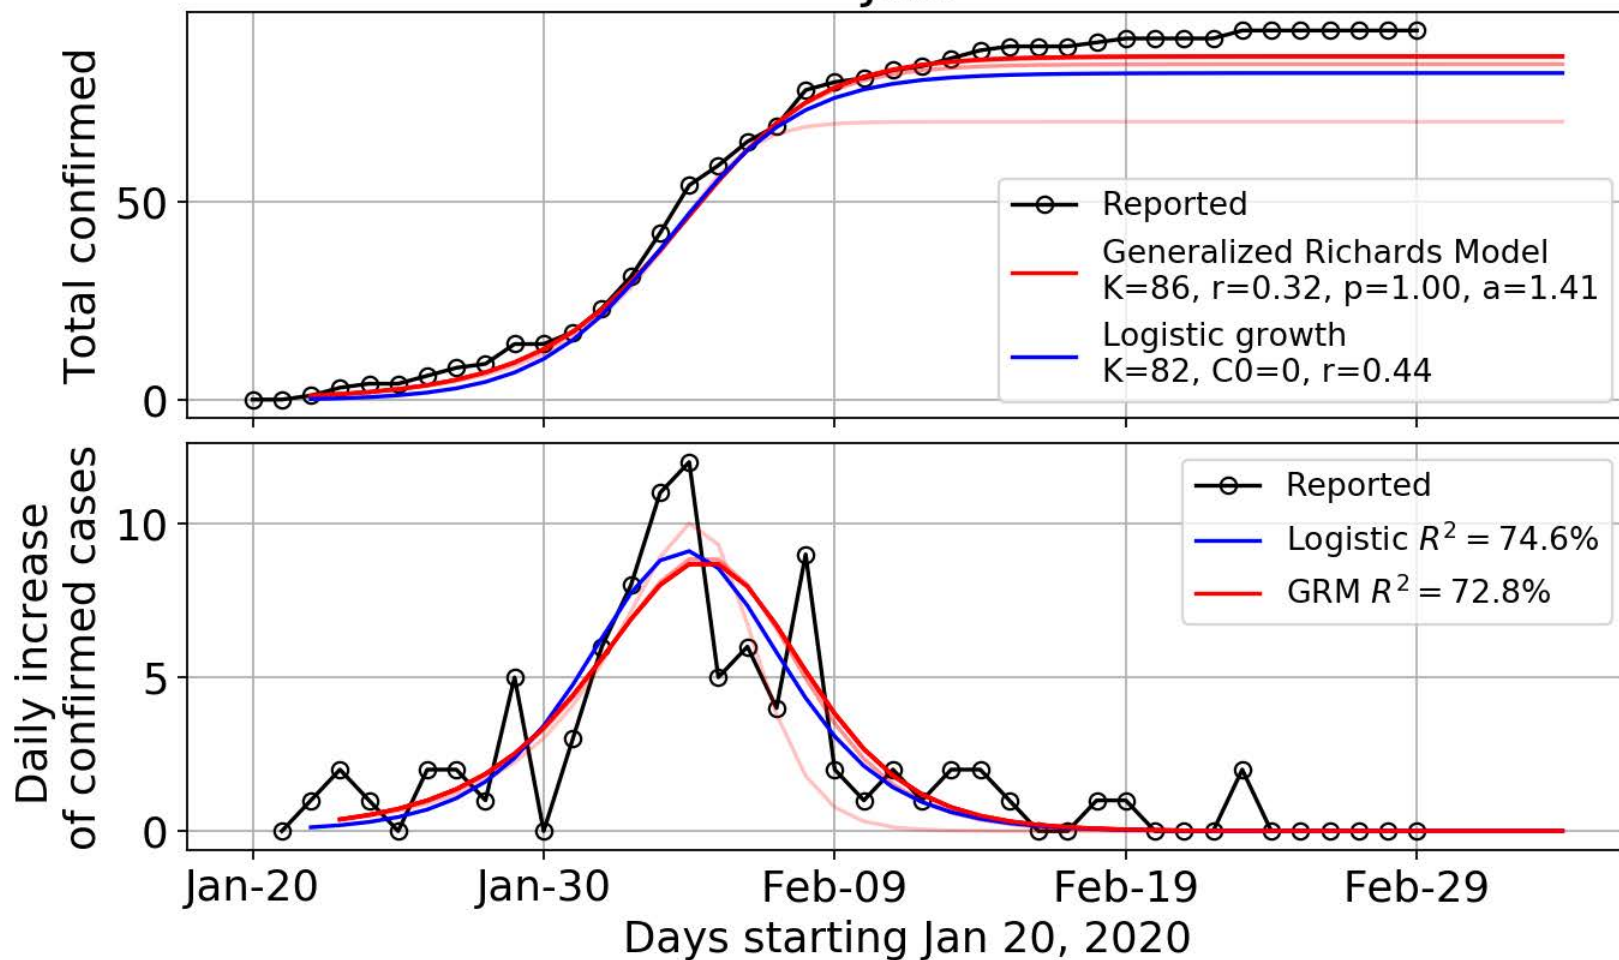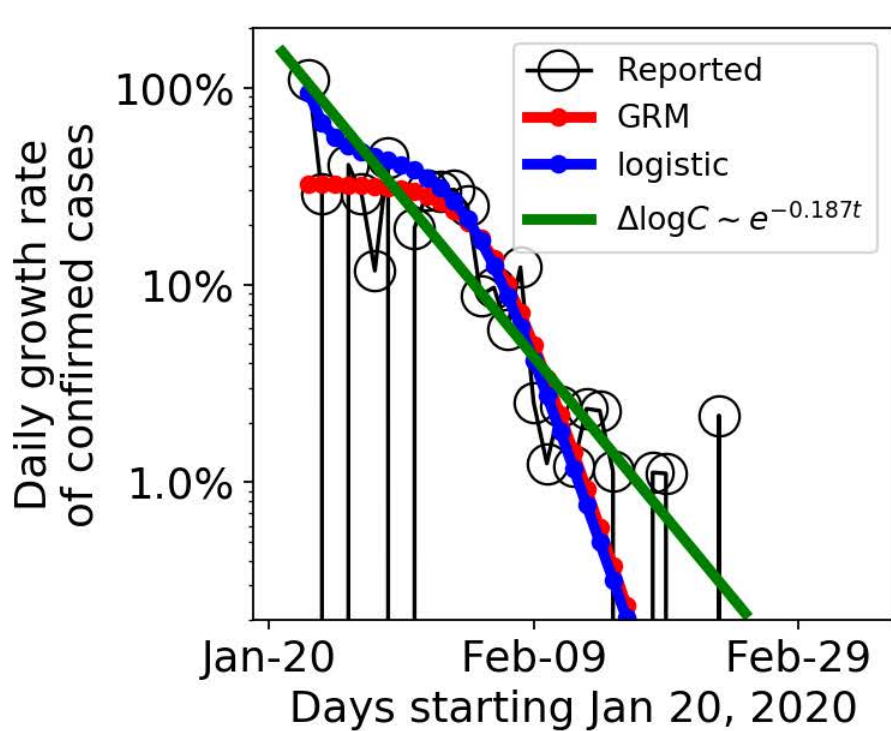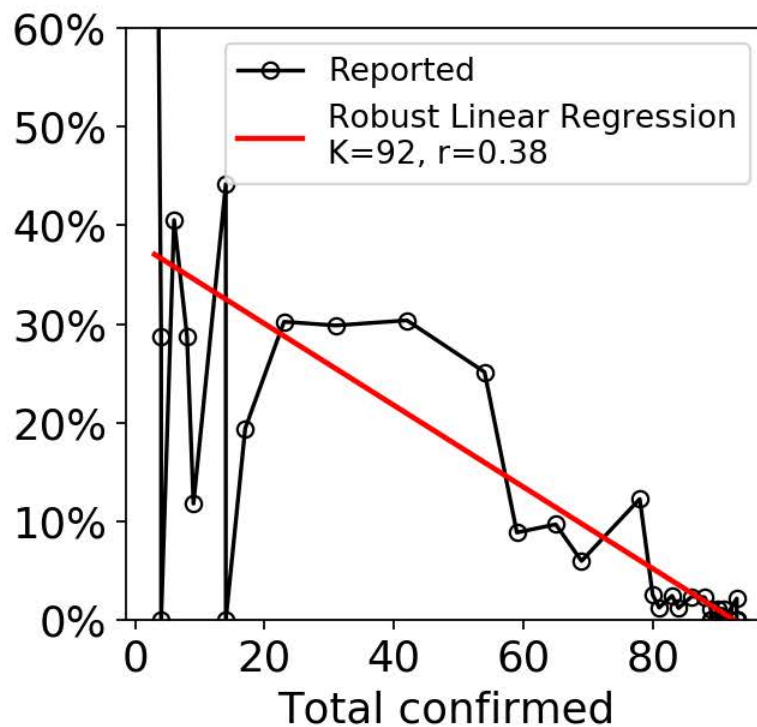

# Xinjiang

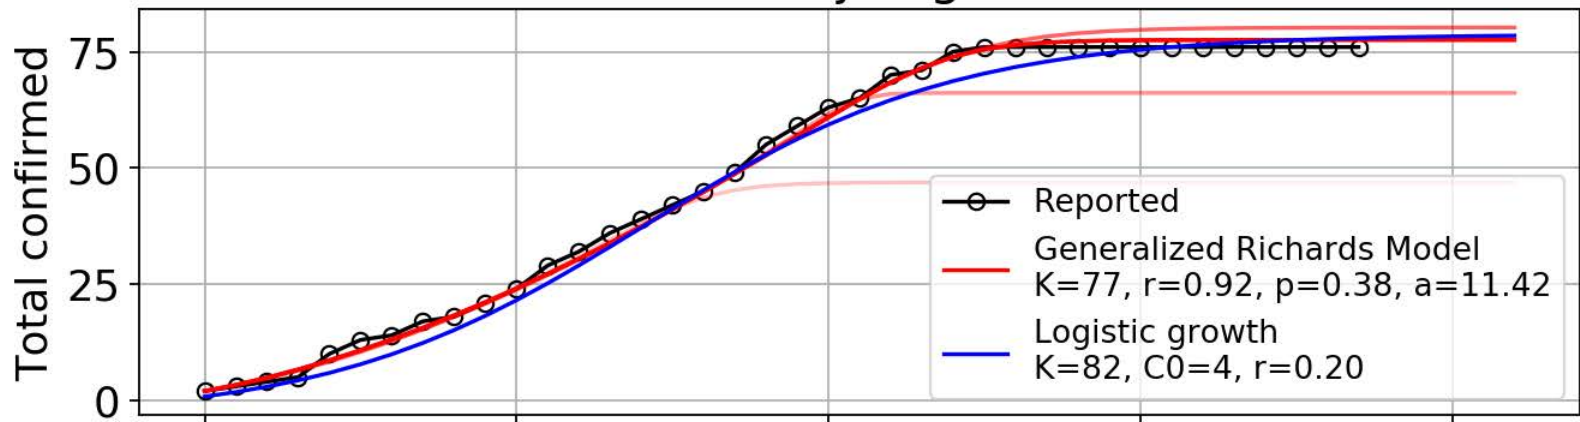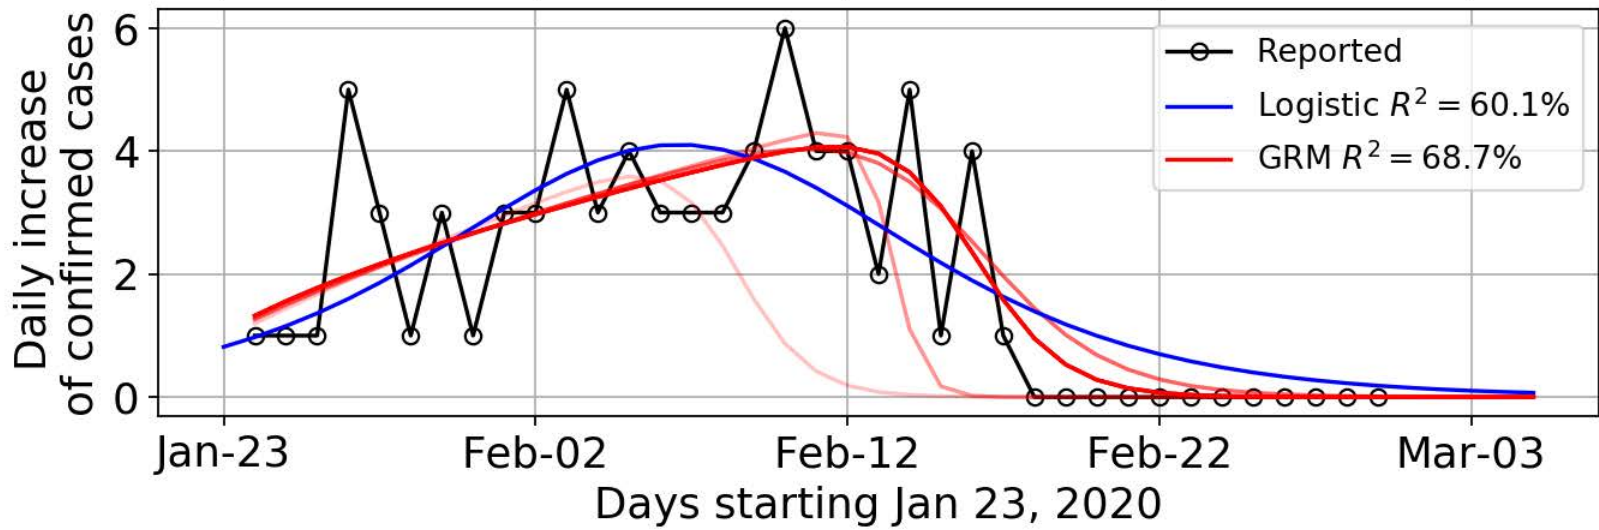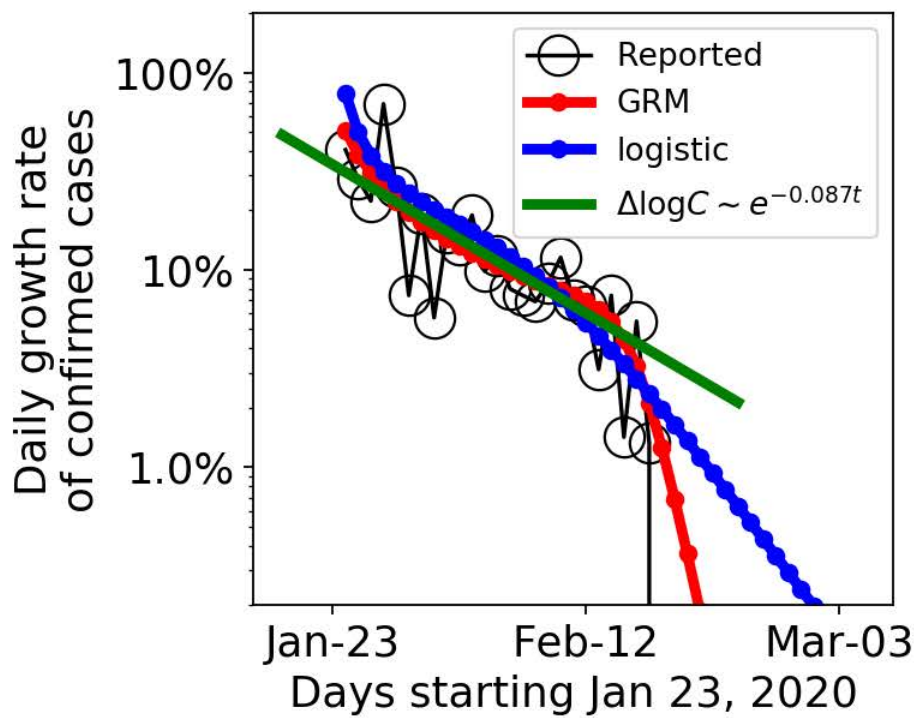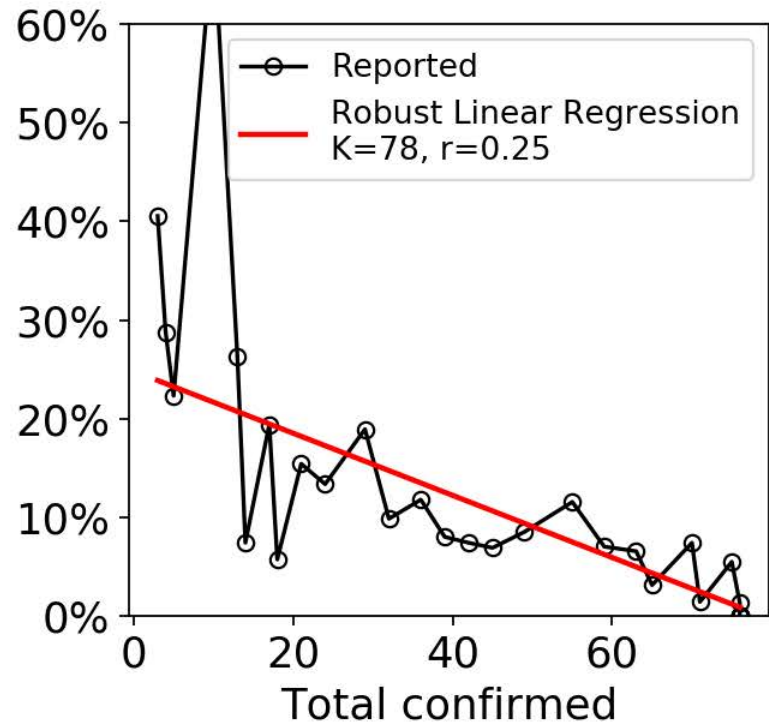

# Neimenggu

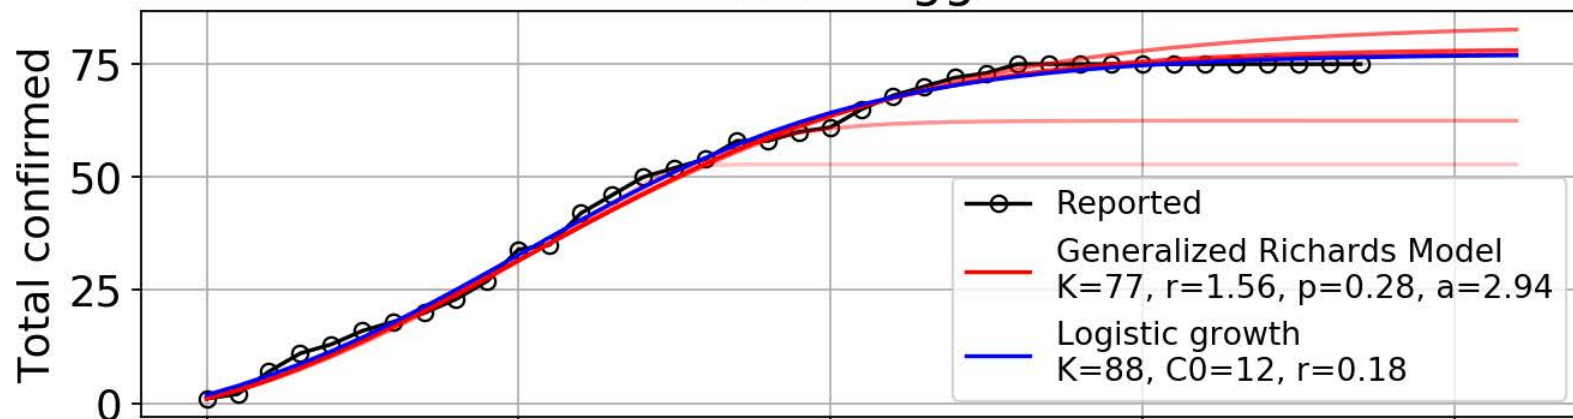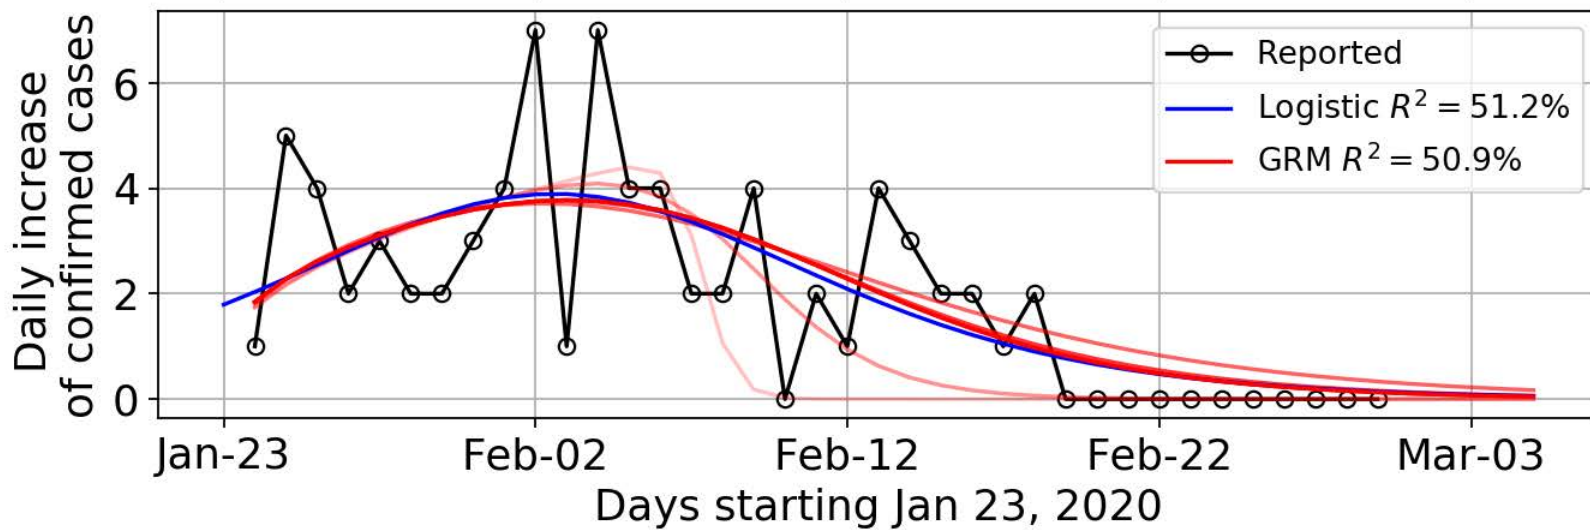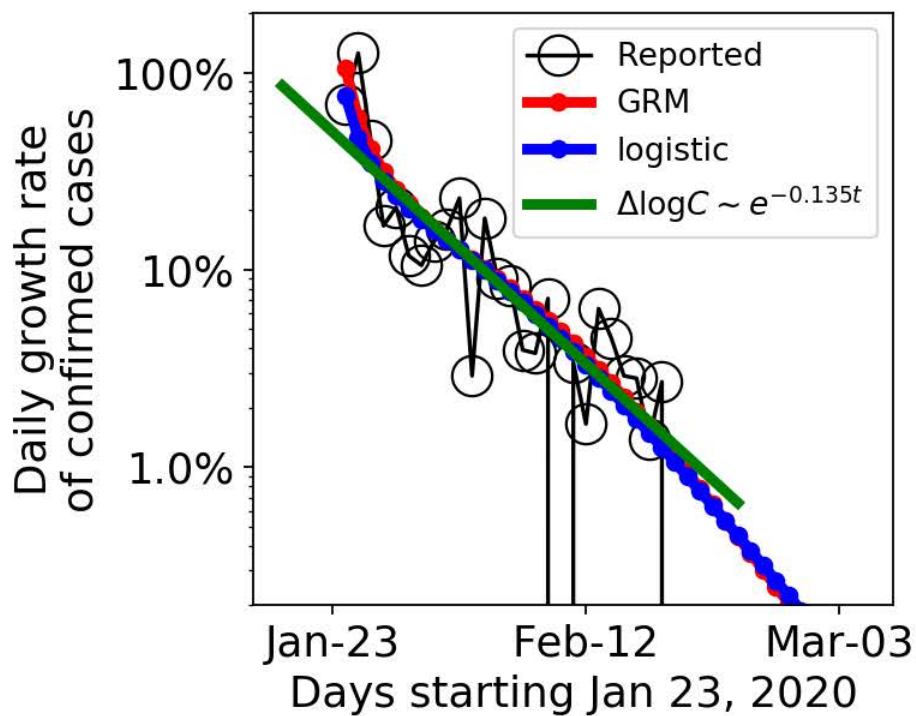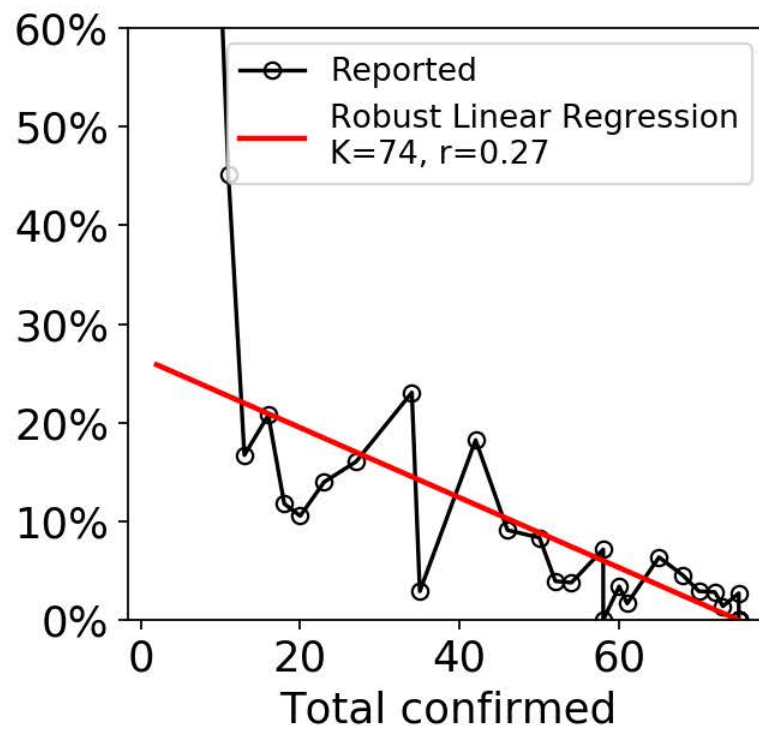

# Ningxia

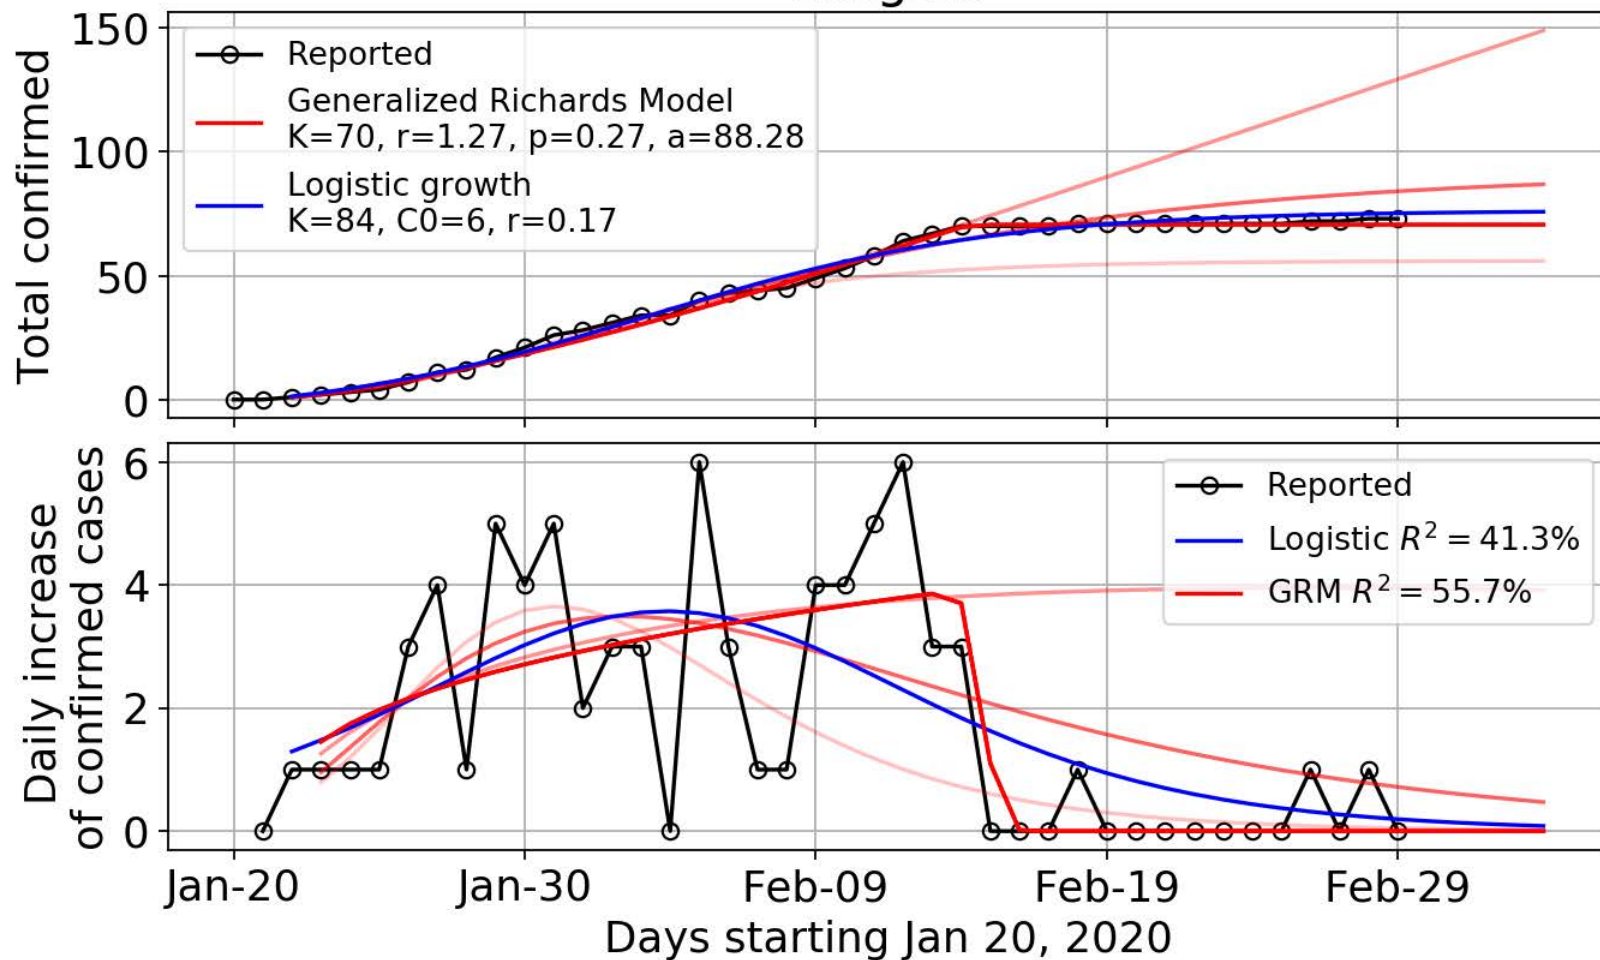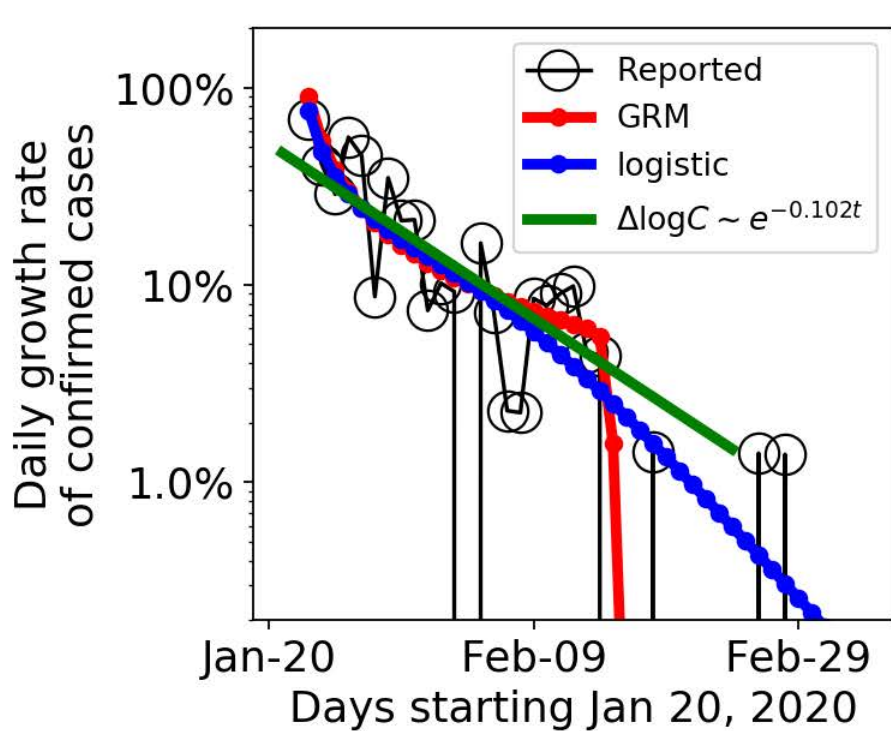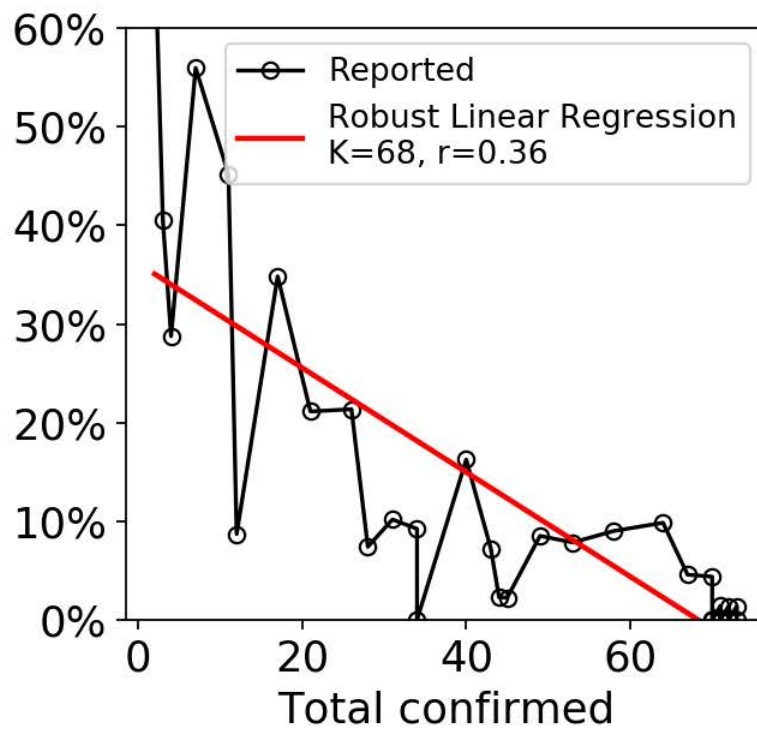

# Qinghai

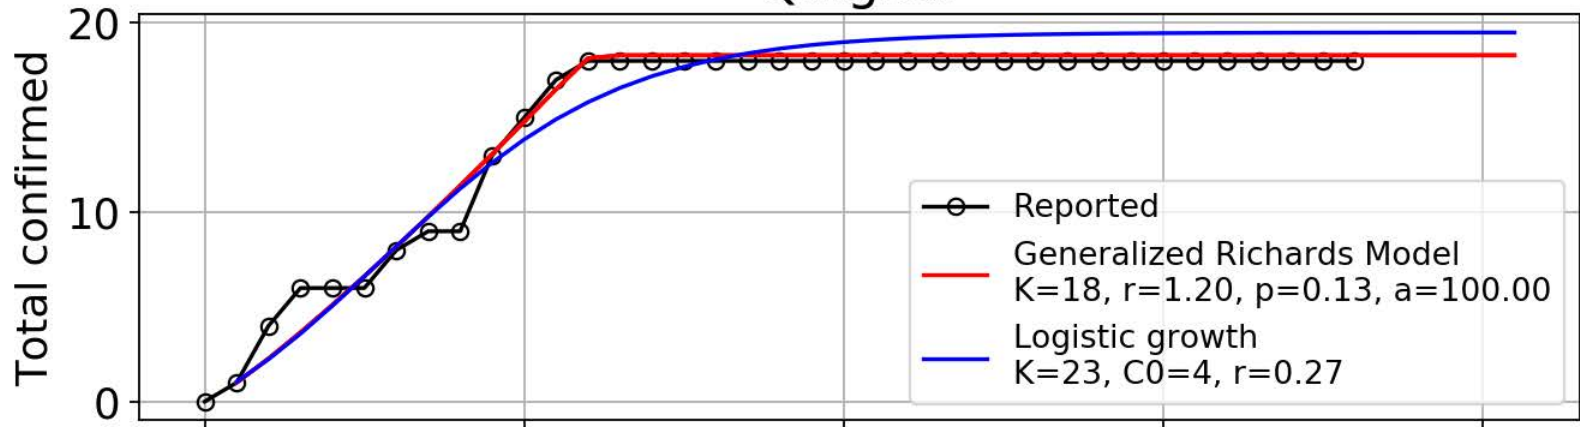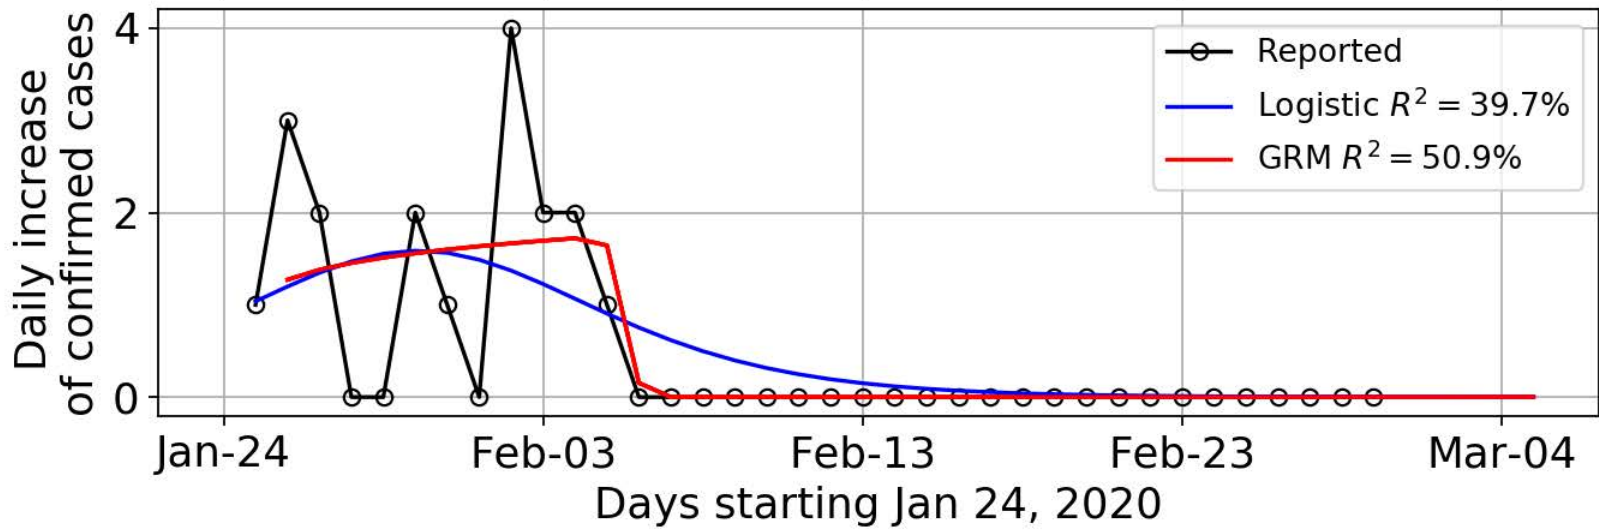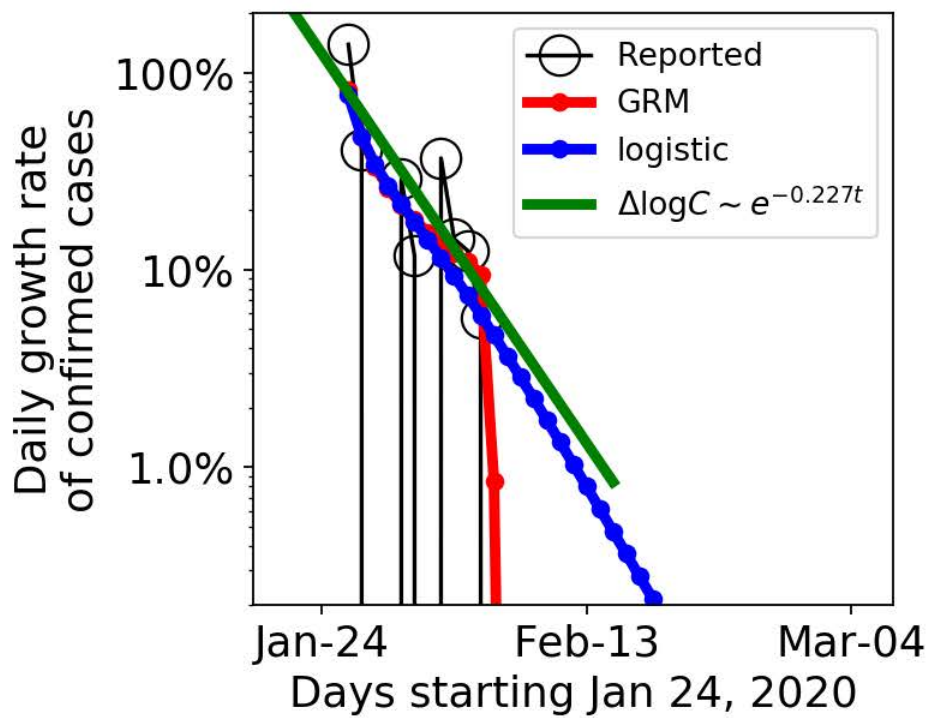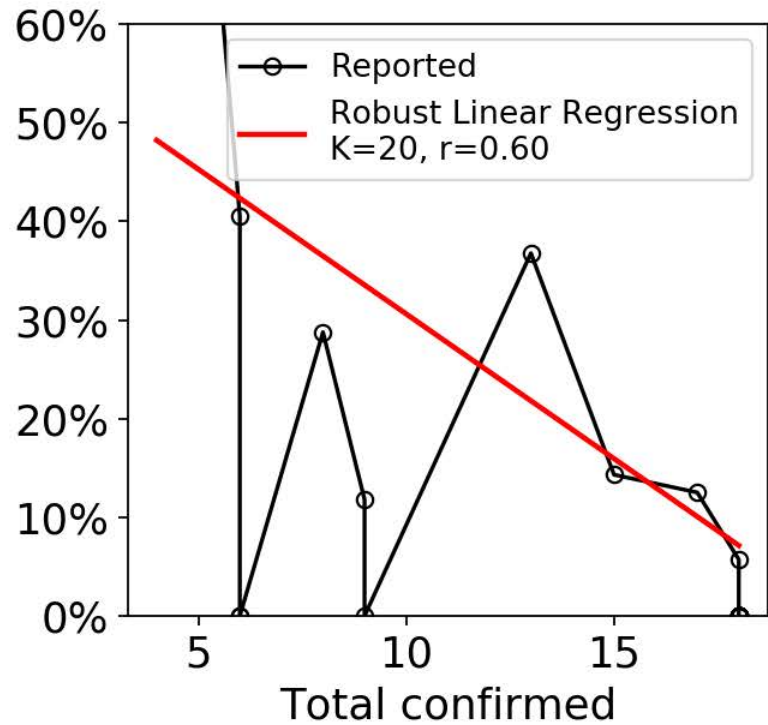

Supplement: Supplementary file [file 2020.03.11.20034363-1.pdf]
